# Supplementary material for: Copper-catalyzed [4+1] cycloannulation of 2-aminochalcones with ethyl diazophenylacetates via ester rearrangement
Source: Royal Society of Chemistry journal article supplement (doi:10.1039/d1nj02424h), 2021-11-30
Supplement: d1nj02424h1.pdf [file d1nj02424h1.pdf]

## Supplementary Information

### Copper-catalyzed [4+1] Cycloannulation of 2-aminochalcones with ethyl diazophenyl via ester rearrangement

An Li <sup>a</sup>, LiPing Hu <sup>a</sup>, Tao Yang <sup>a</sup>, Zan Yang <sup>a</sup>, Yu Liu <sup>a</sup>, LiJun Li <sup>a</sup>, KeWen Tang <sup>a\*</sup> and CongShan Zhou <sup>a\*</sup>

<sup>a</sup> *Province Key Laboratory for Fine Petrochemical Catalysis and Separation, College of Chemistry and Chemical Engineering, Hunan Institute of Science and Technology, Yueyang, Hunan, 414000, P. R. China.*

\* *Corresponding author. Email: [tangkewen@sina.com](mailto:tangkewen@sina.com) and [zhoucongsh@126.com](mailto:zhoucongsh@126.com).*

## 1. Characterization data of products 2aa-2oa

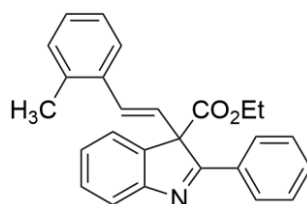

**Ethyl (E)-3-(2-methylstyryl)-2-phenyl-3H-indole-3-carboxylate(3ba).** The reaction mixture was purified by silica gel column chromatography (petroleum ether /EtOAc =100:1-50:1, V/V) to obtain a yellow solid with a yield of 64% (48.7mg), m. p. 115-117°C. <sup>1</sup>H NMR (400 MHz, Chloroform-*d*): δ 8.06 (dd, *J* = 6.5, 3.3 Hz, 2H), 7.75 (d, *J* = 7.7 Hz, 1H), 7.47 – 7.41 (m, 5H), 7.39 – 7.36 (m, 1H), 7.29 (d, *J* = 8.5 Hz, 1H), 7.12 – 7.07 (m, 2H), 7.02 – 6.98 (m, 1H), 6.93 (d, *J* = 16.2 Hz, 1H), 6.32 (d, *J* = 16.2 Hz, 1H), 4.17 – 4.11 (m, 1H), 4.03 – 3.96 (m, 1H), 1.92 (s, 3H), 0.97 (t, *J* = 7.1 Hz, 3H). <sup>13</sup>C{<sup>1</sup>H} NMR (101 MHz, CDCl<sub>3</sub>): δ 176.5, 170.1, 155.2, 140.9, 135.6, 132.2, 131.2, 130.1, 129.9, 129.2, 128.9, 128.7, 127.8, 126.6, 126.5, 126.0, 125.8, 122.3, 121.5, 68.7, 62.1, 19.4, 13.8. HRMS (m/z): [M+H]<sup>+</sup> calcd for C<sub>26</sub>H<sub>24</sub>NO<sub>2</sub>: 382.1802; found: 382.1815.

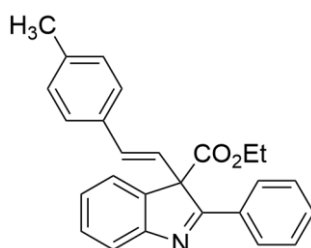

**Ethyl (E)-3-(4-methylstyryl)-2-phenyl-3H-indole-3-carboxylate(3ca).** The reaction mixture was purified by silica gel column chromatography (petroleum ether /EtOAc =100:1-50:1, V/V) to obtain a yellow solid with a yield of 48% (36.7mg), m. p. 126-128°C. <sup>1</sup>H NMR (400 MHz, Chloroform-*d*): δ 8.04 (dd, *J* = 6.6, 3.1 Hz, 2H), 7.74 (d, *J* = 7.4 Hz, 1H), 7.46 – 7.39 (m, 5H), 7.24 (s, 1H), 7.15 (d, *J* = 8.1 Hz, 2H), 7.06 – 7.00 (m, 3H), 6.06 (d, *J* = 16.3 Hz, 1H), 4.13 (ddd, *J* = 11.0, 7.2, 3.8 Hz, 1H), 4.03 – 3.95 (m, 1H), 2.26 (s, 3H), 0.95 (t, *J* = 7.1 Hz, 3H). <sup>13</sup>C{<sup>1</sup>H} NMR (101 MHz, CDCl<sub>3</sub>): δ 176.5, 170.2, 155.3, 140.9, 137.9, 133.6, 132.2, 131.4, 131.1, 129.2, 129.1, 128.9, 128.7, 126.5, 123.8, 122.4, 121.4, 68.5, 62.0, 21.2, 13.7. HRMS (m/z): [M+H]<sup>+</sup> calcd for C<sub>26</sub>H<sub>24</sub>NO<sub>2</sub>: 382.1802; found: 382.1812.

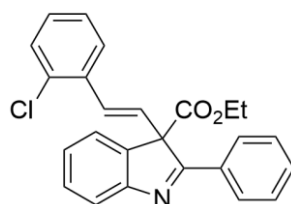

**Ethyl (E)-3-(2-chlorostyryl)-2-phenyl-3H-indole-3-carboxylate(3da).** The reaction mixture was purified by silica gel column chromatography (petroleum ether /EtOAc =100:1-50:1, V/V) to obtain a yellow solid with a yield of 53% (41.5mg), m. p. 111-114°C. <sup>1</sup>H NMR (400 MHz, Chloroform-*d*): δ 8.05 (dd, *J* = 6.6, 3.1 Hz, 2H), 7.76 (d, *J* = 7.6 Hz, 1H), 7.48 – 7.45 (m, 5H), 7.29 (t, *J* = 7.4 Hz, 1H), 7.25 – 7.09 (m, 4H), 6.99 (d, *J* = 16.3 Hz, 1H), 6.56 (d, *J* = 16.3 Hz, 1H), 4.19 – 4.11 (m, 1H), 4.05 – 3.98 (m, 1H), 0.98 (t, *J* = 7.1 Hz, 3H). <sup>13</sup>C{<sup>1</sup>H} NMR (101 MHz, CDCl<sub>3</sub>): δ 176.1, 170.0, 155.3, 140.3, 134.7, 133.3, 132.1, 131.2, 129.6, 129.3, 128.92, 128.87, 128.7, 128.4, 127.8, 127.1, 126.7, 126.6, 122.4, 121.5, 68.6, 62.2, 13.7. HRMS (m/z): [M+H]<sup>+</sup> calcd for C<sub>25</sub>H<sub>21</sub>ClNO<sub>2</sub>: 402.1255; found: 402.1271.

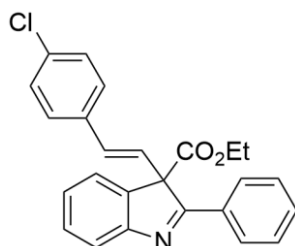

**Ethyl (E)-3-(4-chlorostyryl)-2-phenyl-3H-indole-3-carboxylate(3ea).** The reaction mixture was purified by silica gel column chromatography (petroleum ether /EtOAc =100:1-50:1, V/V) to obtain a yellow liquid with a yield of 43% (33.8mg). <sup>1</sup>H NMR (400 MHz, Chloroform-*d*): δ 8.08 – 7.98 (m, 2H), 7.75 (d, *J* = 7.7 Hz, 1H), 7.48 – 7.40 (m, 5H), 7.33 – 7.26 (m, 1H), 7.18 (d, *J* = 1.6 Hz, 4H), 7.06 (d, *J* = 16.3 Hz, 1H), 6.05 (d, *J* = 16.4 Hz, 1H), 4.17 – 4.11 (m, 1H), 4.04 – 3.95 (m, 1H), 0.96 (t, *J* = 7.1 Hz, 3H). <sup>13</sup>C{<sup>1</sup>H} NMR (101 MHz, CDCl<sub>3</sub>): δ 176.2, 170.1, 155.3, 140.6, 134.8, 133.6, 132.0, 131.3, 130.3, 129.3, 128.8, 128.7, 128.6, 127.8, 126.6, 125.6, 122.3, 121.5, 68.3, 62.2, 13.7. HRMS (m/z): [M+H]<sup>+</sup> calcd for C<sub>25</sub>H<sub>21</sub>ClNO<sub>2</sub>: 402.1255; found: 402.1270.

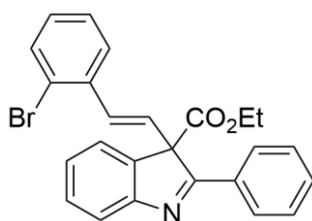

**Ethyl (E)-3-(2-bromostyryl)-2-phenyl-3H-indole-3-carboxylate(3fa).** The reaction mixture was purified by silica gel column chromatography (petroleum ether /EtOAc =100:1-50:1, V/V) to obtain a yellow solid with a yield of 50% (45.4mg), m. p. 125-127°C. <sup>1</sup>H NMR (400 MHz, Chloroform-*d*): δ 8.05 (dd, *J* = 6.8, 3.0 Hz, 2H), 7.76 (d, *J* = 7.7 Hz, 1H), 7.49 – 7.40 (m, 7H), 7.30 (t, *J* = 7.9 Hz, 1H), 7.20 (t, *J* = 7.4 Hz, 1H), 7.05 – 7.00 (m, 1H), 6.92 (d, *J* = 16.2 Hz, 1H), 6.53 (d, *J* = 16.2 Hz, 1H), 4.20 – 4.12 (m, 1H), 4.06 – 3.98 (m, 1H), 0.98 (t, *J* = 7.1 Hz, 3H). <sup>13</sup>C{<sup>1</sup>H} NMR (101 MHz, CDCl<sub>3</sub>): δ 176.0, 170.0, 155.3, 140.3, 136.5, 132.8, 132.1, 131.1, 129.3, 129.2, 128.9,

128.7, 128.0, 127.4, 127.3, 126.6, 123.8, 122.4, 121.5, 68.5, 62.2, 13.8. HRMS (m/z): [M+H]<sup>+</sup> calcd for C<sub>25</sub>H<sub>21</sub>BrNO<sub>2</sub>: 446.0750; found: 446.0767.

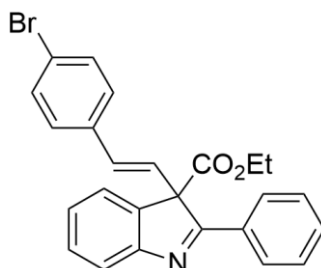

**Ethyl (E)-3-(4-bromostyryl)-2-phenyl-3H-indole-3-carboxylate(3ga).** The reaction mixture was purified by silica gel column chromatography (petroleum ether /EtOAc =100:1-50:1, V/V) to obtain a yellow liquid with a yield of 51% (44.5mg). <sup>1</sup>H NMR (400 MHz, Chloroform-*d*): δ 8.02 (dd, *J* = 7.4, 2.3 Hz, 2H), 7.75 (d, *J* = 7.7 Hz, 1H), 7.48 – 7.40 (m, 5H), 7.34 (d, *J* = 8.5 Hz, 2H), 7.28 (d, *J* = 7.5 Hz, 1H), 7.12 – 7.09 (m, 2H), 7.06 (s, 1H), 6.03 (d, *J* = 16.4 Hz, 1H), 4.18 – 4.10 (m, 1H), 4.04 – 3.95 (m, 1H), 0.96 (t, *J* = 7.1 Hz, 3H). <sup>13</sup>C{<sup>1</sup>H} NMR (101 MHz, CDCl<sub>3</sub>): δ 176.2, 170.0, 155.3, 140.6, 135.3, 132.0, 131.6, 131.3, 130.4, 129.3, 128.78, 128.75, 128.1, 126.7, 125.7, 122.3, 121.8, 121.5, 68.3, 62.2, 13.7. HRMS (m/z): [M+H]<sup>+</sup> calcd for C<sub>25</sub>H<sub>21</sub>BrNO<sub>2</sub>: 446.0750; found: 446.0765.

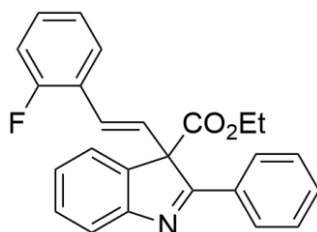

**Ethyl (E)-3-(2-fluorostyryl)-2-phenyl-3H-indole-3-carboxylate(3ha).** The reaction mixture was purified by silica gel column chromatography (petroleum ether /EtOAc =100:1-50:1, V/V) to obtain a yellow solid with a yield of 52% (40mg), m. p. 95-100°C. <sup>1</sup>H NMR (400 MHz, Chloroform-*d*): δ 8.04 (dd, *J* = 6.5, 3.1 Hz, 2H), 7.75 (d, *J* = 7.5 Hz, 1H), 7.48 – 7.41 (m, 5H), 7.38 – 7.34 (m, 1H), 7.28 (t, *J* = 7.5 Hz, 1H), 7.19 – 7.12 (m, 2H), 7.01 (t, *J* = 7.5 Hz, 1H), 6.94 – 6.88 (m, 1H), 6.27 (d, *J* = 16.5 Hz, 1H), 4.15 (dd, *J* = 10.8, 7.1 Hz, 1H), 4.05 – 3.97 (m, 1H), 0.97 (t, *J* = 7.1 Hz, 3H). <sup>13</sup>C{<sup>1</sup>H} NMR (101 MHz, CDCl<sub>3</sub>): δ 176.2, 170.0, 160.2 (d, *J* = 251.5 Hz), 155.3, 140.5, 132.1, 131.2, 129.2 (d, *J* = 8.1 Hz), 128.8, 128.7, 127.7 (d, *J* = 3.0 Hz), 127.6 (d, *J* = 6.1 Hz), 126.6, 124.4 (d, *J* = 3.0 Hz), 124.2 (d, *J* = 12.1 Hz), 124.0 (d, *J* = 3.0 Hz), 122.4, 121.5, 115.7 (d, *J* = 22.2 Hz), 68.7, 62.1, 13.7. <sup>19</sup>F NMR (376MHz, CDCl<sub>3</sub>): δ -117.16. HRMS (m/z): [M+H]<sup>+</sup> calcd for C<sub>25</sub>H<sub>21</sub>FNO<sub>2</sub>: 386.1551; found: 386.1559.

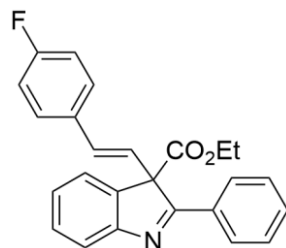

**Ethyl (E)-3-(4-fluorostyryl)-2-phenyl-3H-indole-3-carboxylate(3ia).** The reaction mixture was purified by silica gel column chromatography (petroleum ether /EtOAc =100:1-50:1, V/V) to obtain a yellow liquid with a yield of 43% (33.2mg).  $^1\text{H}$  NMR (400 MHz, Chloroform-*d*):  $\delta$  8.08 – 7.98 (m, 2H), 7.75 (d,  $J$  = 7.7 Hz, 1H), 7.48 – 7.40 (m, 5H), 7.28 (d,  $J$  = 7.5 Hz, 1H), 7.21 (dd,  $J$  = 8.7, 5.4 Hz, 2H), 7.00 (d,  $J$  = 16.3 Hz, 1H), 6.91 (t,  $J$  = 8.7 Hz, 2H), 6.06 (d,  $J$  = 16.4 Hz, 1H), 4.14 (dq,  $J$  = 10.8, 7.1 Hz, 1H), 4.03 – 3.95 (m, 1H), 0.96 (t,  $J$  = 7.1 Hz, 3H).  $^{13}\text{C}\{^1\text{H}\}$  NMR (101 MHz,  $\text{CDCl}_3$ ):  $\delta$  176.3, 170.1, 162.5 (d,  $J$  = 248.5 Hz), 155.3, 140.7, 132.5 (d,  $J$  = 3.0 Hz), 132.1, 131.2, 130.3, 129.2, 128.8, 128.7, 128.1 (d,  $J$  = 8.1 Hz), 126.6, 124.68, 124.65, 122.3, 121.5, 115.4 (d,  $J$  = 22.2 Hz), 68.35, 62.11, 13.72.  $^{19}\text{F}$  NMR (376MHz,  $\text{CDCl}_3$ ):  $\delta$  -113.72. HRMS ( $m/z$ ):  $[\text{M}+\text{H}]^+$  calcd for  $\text{C}_{25}\text{H}_{21}\text{FNO}_2$ : 386.1551; found: 386.1561.

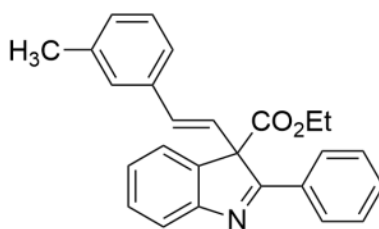

**Ethyl (E)-3-(3-methylstyryl)-2-phenyl-3H-indole-3-carboxylate(3ja).** The reaction mixture was purified by silica gel column chromatography (petroleum ether /EtOAc =100:1-50:1, V/V) to obtain a yellow solid with a yield of 48% (35.7mg), m. p. 106-109°C.  $^1\text{H}$  NMR (400 MHz, Chloroform-*d*):  $\delta$  8.04 (dd,  $J$  = 7.1, 2.6 Hz, 2H), 7.74 (d,  $J$  = 7.6 Hz, 1H), 7.47 – 7.40 (m, 5H), 7.34 – 7.21 (m, 2H), 7.12 – 7.06 (m, 3H), 6.99 (d,  $J$  = 7.3 Hz, 1H), 6.06 (d,  $J$  = 16.4 Hz, 1H), 4.17 – 4.10 (m, 1H), 4.03 – 3.96 (m, 1H), 2.26 (s, 3H), 0.96 (t,  $J$  = 7.1 Hz, 3H).  $^{13}\text{C}\{^1\text{H}\}$  NMR (101 MHz,  $\text{CDCl}_3$ ):  $\delta$  176.5, 170.2, 155.3, 141.0, 138.1, 136.3, 132.1, 131.6, 131.2, 129.1, 128.9, 128.74, 128.68, 128.4, 127.2, 126.6, 124.7, 123.7, 122.4, 121.4, 68.4, 62.1, 21.3, 13.7. HRMS ( $m/z$ ):  $[\text{M}+\text{H}]^+$  calcd for  $\text{C}_{26}\text{H}_{24}\text{NO}_2$ : 382.1802; found: 382.1810.

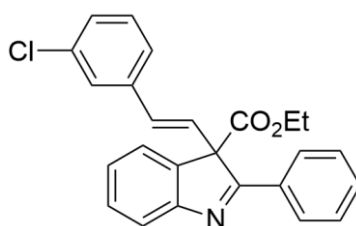

**Ethyl (E)-3-(3-chlorostyryl)-2-phenyl-3H-indole-3-carboxylate(3ka).** The reaction mixture was purified by silica gel column chromatography (petroleum ether /EtOAc =100:1-50:1, V/V) to obtain a yellow solid with a yield of 38% (29.9mg), m. p. 117-120°C. <sup>1</sup>H NMR (400 MHz, Chloroform-*d*): δ 8.02 (dd, *J* = 7.3, 2.4 Hz, 2H), 7.75 (d, *J* = 7.7 Hz, 1H), 7.48 – 7.40 (m, 5H), 7.35 – 7.19 (m, 3H), 7.15 – 7.12 (m, 2H), 7.09 (s, 1H), 6.04 (d, *J* = 16.4 Hz, 1H), 4.15 (dq, *J* = 10.8, 7.1 Hz, 1H), 4.04 – 3.96 (m, 1H), 0.96 (t, *J* = 7.1 Hz, 3H). <sup>13</sup>C{<sup>1</sup>H} NMR (101 MHz, CDCl<sub>3</sub>): δ 176.1, 170.0, 155.3, 140.6, 138.2, 134.5, 132.0, 131.3, 130.2, 129.7, 129.3, 128.8, 127.9, 126.7, 126.5, 126.4, 124.8, 122.3, 121.5, 68.3, 62.2, 13.7. HRMS (m/z): [M+H]<sup>+</sup> calcd for C<sub>25</sub>H<sub>21</sub>ClNO<sub>2</sub>: 402.1255; found: 402.1270.

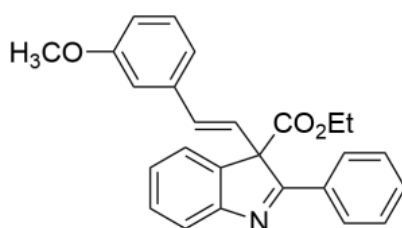

**Ethyl (E)-3-(3-methoxystyryl)-2-phenyl-3H-indole-3-carboxylate(3la).** The reaction mixture was purified by silica gel column chromatography (petroleum ether /EtOAc =100:1-50:1, V/V) to obtain a yellow solid with a yield of 31% (24.7mg), m. p. 105-110°C. <sup>1</sup>H NMR (400 MHz, Chloroform-*d*): δ 8.09 – 7.98 (m, 2H), 7.75 (d, *J* = 7.6 Hz, 1H), 7.48 – 7.39 (m, 5H), 7.27 – 7.25 (m, 1H), 7.16 – 7.06 (m, 2H), 6.85 (d, *J* = 7.7 Hz, 1H), 6.78 (s, 1H), 6.73 (dd, *J* = 7.9, 2.2 Hz, 1H), 6.07 (d, *J* = 16.3 Hz, 1H), 4.15 (dq, *J* = 10.8, 7.1 Hz, 1H), 4.04 – 3.96 (m, 1H), 3.74 (s, 3H), 0.96 (t, *J* = 7.1 Hz, 3H). <sup>13</sup>C{<sup>1</sup>H} NMR (101 MHz, CDCl<sub>3</sub>): δ 176.4, 170.1, 159.7, 155.3, 140.9, 137.8, 132.1, 131.4, 131.2, 129.5, 129.2, 128.8, 128.7, 126.6, 125.2, 122.4, 121.4, 119.2, 113.7, 111.8, 68.4, 62.1, 55.2, 13.7. HRMS (m/z): [M+H]<sup>+</sup> calcd for C<sub>26</sub>H<sub>24</sub>NO<sub>3</sub>: 398.1751; found: 398.1760.

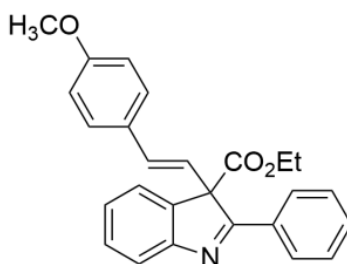

**Ethyl (E)-3-(4-methoxystyryl)-2-phenyl-3H-indole-3-carboxylate(3ma).** The reaction mixture was purified by silica gel column chromatography (petroleum ether /EtOAc =100:1-50:1, V/V) to obtain a yellow liquid with a yield of 39% (30.4mg). <sup>1</sup>H NMR (400 MHz, Chloroform-*d*): δ 8.04 (dd, *J* = 6.6, 3.2 Hz, 2H), 7.74 (d, *J* = 7.3 Hz, 1H), 7.46 – 7.41 (m, 5H), 7.25 (s, 1H), 7.18 (d, *J* = 8.7 Hz, 2H), 6.94 (d, *J* = 16.3 Hz, 1H), 6.76 (d, *J* = 8.8 Hz, 2H), 6.03 (d, *J* = 16.3 Hz, 1H), 4.14 (ddd, *J* = 10.8, 7.2, 3.6 Hz, 1H), 3.99 (dq, *J* = 10.8, 7.1 Hz, 1H), 3.74 (s, 3H), 0.96 (t, *J* = 7.1 Hz, 3H). <sup>13</sup>C{<sup>1</sup>H} NMR (101 MHz, CDCl<sub>3</sub>): δ 176.6, 170.3, 159.5, 155.3, 141.0, 132.2, 131.1, 130.9,

129.12, 129.08, 128.8, 128.7, 128.6, 127.8, 126.54, 126.52, 122.4, 121.4, 113.9, 68.5, 62.0, 55.3, 13.7. HRMS (m/z): [M+H]<sup>+</sup> calcd for C<sub>26</sub>H<sub>24</sub>NO<sub>3</sub>: 398.1751; found: 398.1761.

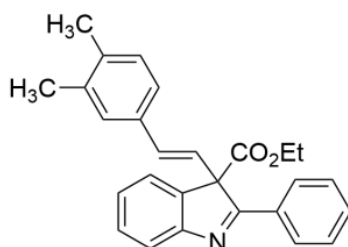

**Ethyl (E)-3-(3,4-dimethylstyryl)-2-phenyl-3H-indole-3-carboxylate(3na).** The reaction mixture was purified by silica gel column chromatography (petroleum ether /EtOAc =100:1-50:1, V/V) to obtain a yellow solid with a yield of 51% (40.2mg), m. p. 115-120°C. <sup>1</sup>H NMR (400 MHz, Chloroform-*d*): δ 8.05 – 8.02 (m, 2H), 7.74 (d, *J* = 8.4 Hz, 1H), 7.50 (t, *J* = 7.7 Hz, 1H), 7.45 – 7.39 (m, 5H), 7.24 (d, *J* = 2.1 Hz, 1H), 7.05 (d, *J* = 4.1 Hz, 1H), 6.98 (s, 2H), 6.04 (d, *J* = 16.4 Hz, 1H), 4.16 – 4.10 (m, 1H), 4.03 – 3.95 (m, 1H), 2.17 (s, 6H), 0.95 (t, *J* = 7.1 Hz, 3H). <sup>13</sup>C{<sup>1</sup>H} NMR (101 MHz, CDCl<sub>3</sub>): δ 176.6, 170.3, 155.3, 141.1, 136.61, 136.57, 134.9, 134.0, 132.2, 131.5, 131.1, 130.1, 129.7, 129.1, 128.91, 128.86, 128.7, 127.7, 126.5, 124.0, 123.6, 122.4, 121.4, 68.5, 62.4, 62.0, 19.7, 19.5, 14.2, 13.7. HRMS (m/z): [M+H]<sup>+</sup> calcd for C<sub>27</sub>H<sub>26</sub>NO<sub>2</sub>: 396.1958; found: 396.1971.

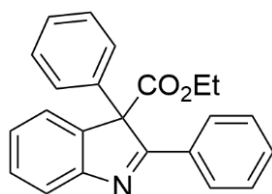

**Ethyl 2,3-diphenyl-3H-indole-3-carboxylate(3oa).** The reaction mixture was purified by silica gel column chromatography (petroleum ether /EtOAc =100:1-50:1, V/V) to obtain a yellow solid with a yield of 31% (21.8mg), m. p. 105-110°C. <sup>1</sup>H NMR (400 MHz, Chloroform-*d*): δ 7.92 (d, *J* = 7.1 Hz, 2H), 7.73 (d, *J* = 7.7 Hz, 1H), 7.41 – 7.36 (m, 3H), 7.34 (d, *J* = 7.7 Hz, 3H), 7.26 – 7.18 (m, 5H), 4.20 – 4.14 (m, 1H), 4.08 – 4.00 (m, 1H), 0.99 (t, *J* = 7.1 Hz, 3H). <sup>13</sup>C{<sup>1</sup>H} NMR (101 MHz, CDCl<sub>3</sub>): δ 177.2, 169.3, 154.7, 142.4, 136.7, 132.6, 130.9, 129.2, 129.1, 128.8, 128.3, 127.7, 127.4, 126.7, 123.3, 121.2, 71.6, 62.0, 13.7. HRMS (m/z): [M+H]<sup>+</sup> calcd for C<sub>23</sub>H<sub>20</sub>NO<sub>2</sub>: 342.1489; found: 342.1498.

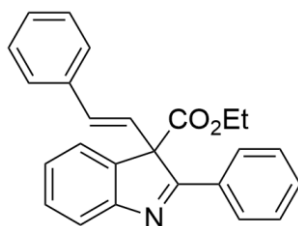

**Ethyl (E)-2-phenyl-3-styryl-3H-indole-3-carboxylate(3aa).** The reaction mixture was purified by silica gel column chromatography (petroleum ether /EtOAc =100:1-50:1, V/V) to obtain a yellow solid with a yield of 92% (67.3mg), m. p. 90-95°C. <sup>1</sup>H NMR (400 MHz, Chloroform-*d*): δ 8.04 (dd, *J* = 6.5, 3.3 Hz, 2H), 7.77 – 7.72 (m, 1H), 7.47 – 7.40 (m, 5H), 7.28 – 7.16 (m, 6H), 7.10 (d, *J* = 16.4 Hz, 1H), 6.10 (d, *J* = 16.4 Hz, 1H), 4.14 (dq, *J* = 10.8, 7.1 Hz, 1H), 3.99 (dq, *J* = 10.8, 7.1 Hz, 1H), 0.95 (t, *J* = 7.1 Hz, 3H). <sup>13</sup>C{<sup>1</sup>H} NMR (101 MHz, CDCl<sub>3</sub>): δ 176.4, 170.2, 155.3, 140.9, 136.3, 132.1, 131.5, 131.2, 129.2, 128.9, 128.7, 128.5, 128.0, 126.62, 126.56, 124.9, 122.4, 121.5, 68.4, 62.1, 13.8. HRMS (*m/z*): [M+H]<sup>+</sup> calcd for C<sub>25</sub>H<sub>22</sub>NO<sub>2</sub>: 368.1645; found: 368.1656.

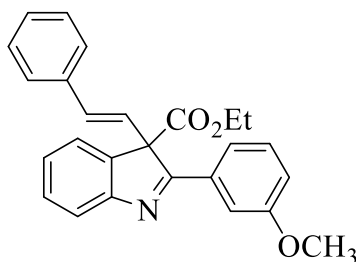

**Ethyl (E)-2-(3-methoxyphenyl)-3-styryl-3H-indole-3-carboxylate(3ab).** The reaction mixture was purified by silica gel column chromatography (petroleum ether /EtOAc =100:1-50:1, V/V) to obtain a yellow liquid with a yield of 66% (51.8mg). <sup>1</sup>H NMR (400 MHz, Chloroform-*d*): δ 7.78 – 7.70 (m, 2H), 7.50 (d, *J* = 7.8 Hz, 1H), 7.43 (t, *J* = 8.1 Hz, 2H), 7.33 (t, *J* = 8.0 Hz, 1H), 7.30 – 7.23 (m, 4H), 7.21 (d, *J* = 7.7 Hz, 1H), 7.19 – 7.14 (m, 1H), 7.09 (d, *J* = 16.4 Hz, 1H), 7.01 (dd, *J* = 7.9, 2.9 Hz, 1H), 6.10 (d, *J* = 16.4 Hz, 1H), 4.14 (dq, *J* = 10.8, 7.1 Hz, 1H), 4.00 (dq, *J* = 10.8, 7.1 Hz, 1H), 3.86 (s, 3H), 0.97 (t, *J* = 7.1 Hz, 3H). <sup>13</sup>C{<sup>1</sup>H} NMR (101 MHz, CDCl<sub>3</sub>): δ 176.4, 170.2, 159.8, 155.3, 140.9, 136.4, 133.5, 131.5, 129.6, 129.2, 128.5, 128.0, 126.64, 126.55, 125.0, 122.4, 121.7, 121.5, 118.0, 112.8, 68.5, 62.1, 55.4, 13.8. HRMS (*m/z*): [M+H]<sup>+</sup> calcd for C<sub>26</sub>H<sub>24</sub>NO<sub>3</sub>: 398.1751; found: 398.1761.

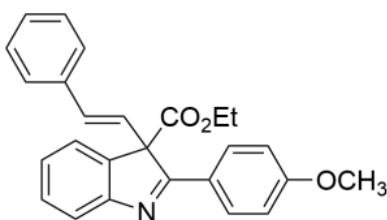

**Ethyl (E)-2-(4-methoxyphenyl)-3-styryl-3H-indole-3-carboxylate(3ac).** The reaction mixture was purified by silica gel column chromatography (petroleum ether /EtOAc =100:1-50:1, V/V) to obtain a yellow solid with a yield of 56% (44.5mg), m. p. 90-95°C. <sup>1</sup>H NMR (400 MHz, Chloroform-*d*): δ 7.99 (d, *J* = 8.9 Hz, 2H), 7.70 (d, *J* = 7.5 Hz, 1H), 7.40 (d, *J* = 7.5 Hz, 2H), 7.22 (dq, *J* = 10.8, 7.4 Hz, 6H), 7.09 (d, *J* = 16.4 Hz, 1H), 6.95 (d, *J* = 8.9 Hz, 2H), 6.09 (d, *J* = 16.4 Hz, 1H), 4.17 – 4.10 (m, 1H), 4.03 – 3.96 (m, 1H), 3.83 (s, 3H), 0.97 (t, *J* = 7.1 Hz, 3H). <sup>13</sup>C{<sup>1</sup>H} NMR (101 MHz, CDCl<sub>3</sub>): δ 175.9, 170.3, 162.1, 155.5, 140.8, 136.4, 131.5, 130.7, 129.1, 128.5, 127.9,



126.5, 126.0, 125.3, 124.9, 122.3, 121.0, 114.1, 68.3, 62.0, 55.4, 13.8. HRMS (m/z): [M+H]<sup>+</sup> calcd for C<sub>26</sub>H<sub>24</sub>NO<sub>3</sub>: 398.1751; found: 398.1765.

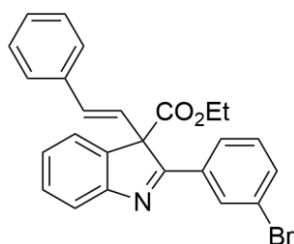

**Ethyl (E)-2-(3-bromophenyl)-3-styryl-3H-indole-3-carboxylate(3ad).** The reaction mixture was purified by silica gel column chromatography (petroleum ether /EtOAc =100:1-50:1, V/V) to obtain a yellow solid with a yield of 70% (62.3mg), m. p. 136-138°C. <sup>1</sup>H NMR (400 MHz, Chloroform-*d*): δ 8.35 (t, *J* = 1.8 Hz, 1H), 7.82 (d, *J* = 7.9 Hz, 1H), 7.78 – 7.73 (m, 1H), 7.57 (d, *J* = 7.0 Hz, 1H), 7.44 (t, *J* = 7.2 Hz, 2H), 7.29 (t, *J* = 7.5 Hz, 2H), 7.26 – 7.15 (m, 5H), 7.04 (d, *J* = 16.4 Hz, 1H), 6.09 (d, *J* = 16.4 Hz, 1H), 4.17 (dq, *J* = 10.8, 7.1 Hz, 1H), 4.00 (dq, *J* = 10.8, 7.1 Hz, 1H), 0.99 (t, *J* = 7.1 Hz, 3H). <sup>13</sup>C{<sup>1</sup>H} NMR (101 MHz, CDCl<sub>3</sub>): δ 174.9, 169.8, 154.9, 140.9, 136.2, 134.2, 134.0, 131.8, 131.4, 130.1, 129.3, 128.5, 128.1, 127.5, 127.0, 126.6, 124.4, 123.0, 122.5, 121.7, 68.5, 62.2, 13.8. HRMS (m/z): [M+H]<sup>+</sup> calcd for C<sub>25</sub>H<sub>21</sub>BrNO<sub>2</sub>: 446.0750; found: 446.0765.

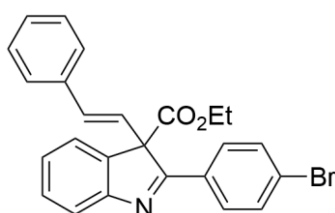

**Ethyl (E)-2-(4-bromophenyl)-3-styryl-3H-indole-3-carboxylate(3ae).** The reaction mixture was purified by silica gel column chromatography (petroleum ether /EtOAc =100:1-50:1, V/V) to obtain a yellow liquid with a yield of 65% (58.4mg). <sup>1</sup>H NMR (400 MHz, Chloroform-*d*): δ 7.91 (d, *J* = 8.6 Hz, 2H), 7.74 (d, *J* = 7.4 Hz, 1H), 7.58 (d, *J* = 8.6 Hz, 2H), 7.43 (t, *J* = 7.1 Hz, 2H), 7.29 – 7.17 (m, 6H), 7.05 (d, *J* = 16.4 Hz, 1H), 6.08 (d, *J* = 16.4 Hz, 1H), 4.14 (dq, *J* = 10.8, 7.1 Hz, 1H), 4.00 (dq, *J* = 10.8, 7.1 Hz, 1H), 0.98 (t, *J* = 7.1 Hz, 3H). <sup>13</sup>C{<sup>1</sup>H} NMR (101 MHz, CDCl<sub>3</sub>): δ 175.3, 169.9, 155.0, 140.9, 136.1, 132.0, 131.7, 131.1, 130.2, 129.3, 128.5, 128.1, 126.9, 126.5, 125.9, 124.5, 122.4, 121.6, 68.4, 62.2, 13.8. HRMS (m/z): [M+H]<sup>+</sup> calcd for C<sub>25</sub>H<sub>21</sub>BrNO<sub>2</sub>: 446.0750; found: 446.0766.

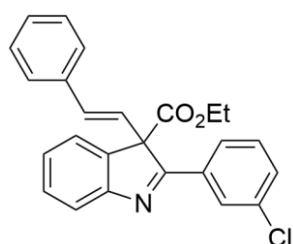

**Ethyl (E)-2-(3-chlorophenyl)-3-styryl-3H-indole-3-carboxylate(3af).** The reaction mixture was purified by silica gel column chromatography (petroleum ether /EtOAc =100:1-50:1, V/V) to obtain a yellow solid with a yield of 33% (26.1mg), m. p. 130-133°C. <sup>1</sup>H NMR (400 MHz, Chloroform-*d*): δ 8.16 (s, 1H), 7.77 (dd, *J* = 14.9, 7.7 Hz, 2H), 7.48 – 7.41 (m, 3H), 7.36 (t, *J* = 7.9 Hz, 1H), 7.30 (d, *J* = 6.7 Hz, 1H), 7.26 – 7.18 (m, 5H), 7.04 (d, *J* = 16.4 Hz, 1H), 6.09 (d, *J* = 16.4 Hz, 1H), 4.17 (dq, *J* = 10.8, 7.1 Hz, 1H), 4.01 (dq, *J* = 10.8, 7.1 Hz, 1H), 1.00 (t, *J* = 7.1 Hz, 3H). <sup>13</sup>C{<sup>1</sup>H} NMR (101 MHz, CDCl<sub>3</sub>): δ 175.0, 169.8, 154.9, 140.9, 136.2, 134.9, 133.9, 131.7, 131.1, 129.9, 129.3, 128.5, 128.3, 127.0, 126.6, 124.4, 122.5, 121.7, 68.5, 62.2, 13.8. HRMS (m/z): [M+H]<sup>+</sup> calcd for C<sub>25</sub>H<sub>21</sub>ClNO<sub>2</sub>: 402.1255; found: 402.1269.

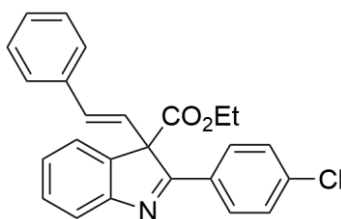

**Ethyl (E)-2-(4-chlorophenyl)-3-styryl-3H-indole-3-carboxylate(3ag).** The reaction mixture was purified by silica gel column chromatography (petroleum ether /EtOAc =100:1-50:1, V/V) to obtain a yellow solid with a yield of 64% (52.1mg), m. p. 105-110°C. <sup>1</sup>H NMR (400 MHz, Chloroform-*d*): δ 8.01 – 7.96 (m, 2H), 7.77 – 7.70 (m, 1H), 7.42 (dd, *J* = 8.0, 3.3 Hz, 4H), 7.28 (d, *J* = 6.6 Hz, 1H), 7.25 – 7.17 (m, 5H), 7.06 (d, *J* = 16.4 Hz, 1H), 6.09 (d, *J* = 16.4 Hz, 1H), 4.18 – 4.10 (m, 1H), 4.00 (dq, *J* = 10.8, 7.1 Hz, 1H), 0.98 (t, *J* = 7.1 Hz, 3H). <sup>13</sup>C{<sup>1</sup>H} NMR (101 MHz, CDCl<sub>3</sub>): δ 175.2, 169.9, 155.0, 140.9, 137.4, 136.2, 131.7, 130.7, 130.1, 129.3, 129.0, 128.5, 128.1, 126.8, 126.5, 124.6, 122.4, 121.5, 68.4, 62.2, 13.8; HRMS (m/z): [M+H]<sup>+</sup> calcd for C<sub>25</sub>H<sub>21</sub>ClNO<sub>2</sub>: 402.1255; found: 402.1270.

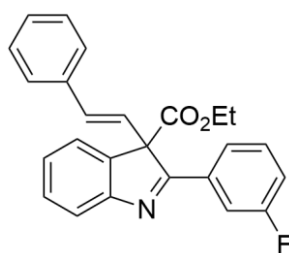

**Ethyl (E)-2-(3-fluorophenyl)-3-styryl-3H-indole-3-carboxylate(3ah).** The reaction mixture was purified by silica gel column chromatography (petroleum ether /EtOAc =100:1-50:1, V/V) to obtain a yellow solid with a yield of 79% (62.9mg), m. p. 90-95°C. <sup>1</sup>H NMR (400 MHz, Chloroform-*d*): δ 7.84 (d, *J* = 10.1 Hz, 1H), 7.74 (t, *J* = 7.1 Hz, 2H), 7.46 – 7.37 (m, 3H), 7.30 – 7.27 (m, 1H), 7.25 – 7.12 (m, 6H), 7.06 (d, *J* = 16.4 Hz, 1H), 6.10 (d, *J* = 16.4 Hz, 1H), 4.16 (dq, *J* = 10.8, 7.1 Hz, 1H), 4.01 (dq, *J* = 10.8, 7.1 Hz, 1H), 0.98 (t, *J* = 7.1 Hz, 3H). <sup>13</sup>C{<sup>1</sup>H} NMR (101 MHz, CDCl<sub>3</sub>): δ 175.2, 169.8, 162.9 (d, *J* = 247.5 Hz), 154.9, 140.9, 136.2, 134.4 (d, *J* = 8.1 Hz), 131.7, 130.2 (d, *J* = 8.1 Hz), 129.3, 128.5, 128.1, 127.0, 126.6, 124.6 (d, *J* = 2.0 Hz),

124.5, 122.5, 121.7, 118.1 (d,  $J = 21.2$  Hz), 115.3 (d,  $J = 23.2$  Hz), 68.5, 62.2, 13.8.  $^{19}\text{F}$  NMR (367 MHz,  $\text{CDCl}_3$ ):  $\delta$  -111.97. HRMS (m/z):  $[\text{M}+\text{H}]^+$  calcd for  $\text{C}_{25}\text{H}_{21}\text{FNO}_2$ : 386.1551; found: 386.1556.

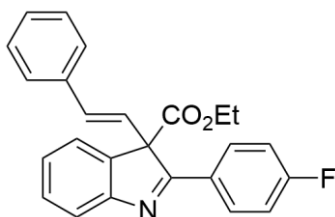

**Ethyl (E)-2-(4-fluorophenyl)-3-styryl-3H-indole-3-carboxylate(3ai).** The reaction mixture was purified by silica gel column chromatography (petroleum ether /EtOAc =100:1-50:1, V/V) to obtain a yellow liquid with a yield of 35% (26.7mg).  $^1\text{H}$  NMR (400 MHz, Chloroform- $d$ ):  $\delta$  8.08 – 8.01 (m, 2H), 7.73 (d,  $J = 7.6$  Hz, 1H), 7.43 (t,  $J = 7.6$  Hz, 2H), 7.26 (q,  $J = 7.3$  Hz, 5H), 7.21 – 7.18 (m, 1H), 7.16 – 7.10 (m, 2H), 7.07 (d,  $J = 16.4$  Hz, 1H), 6.09 (d,  $J = 16.4$  Hz, 1H), 4.15 (dq,  $J = 10.8, 7.1$  Hz, 1H), 4.00 (dq,  $J = 10.8, 7.1$  Hz, 1H), 0.98 (t,  $J = 7.1$  Hz, 3H).  $^{13}\text{C}\{^1\text{H}\}$  NMR (101 MHz,  $\text{CDCl}_3$ ):  $\delta$  175.1, 170.0, 164.5 (d,  $J = 253.5$  Hz), 155.1, 140.9, 136.2, 131.7, 131.0 (d,  $J = 9.1$  Hz), 129.2, 128.5, 128.1, 126.6 (d,  $J = 9.1$  Hz), 124.7, 122.4, 121.4, 115.9 (d,  $J = 21.2$  Hz), 68.4, 62.2, 13.8.  $^{19}\text{F}$  NMR (367 MHz,  $\text{CDCl}_3$ ):  $\delta$  -108.04. HRMS (m/z):  $[\text{M}+\text{H}]^+$  calcd for  $\text{C}_{25}\text{H}_{21}\text{FNO}_2$ : 386.1551; found: 386.1559.

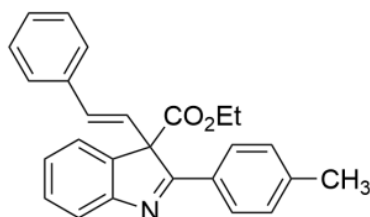

**Ethyl (E)-3-styryl-2-(p-tolyl)-3H-indole-3-carboxylate(3aj).** The reaction mixture was purified by silica gel column chromatography (petroleum ether /EtOAc =100:1-50:1, V/V) to obtain a yellow solid with a yield of 79% (59.8mg), m. p. 100-104°C.  $^1\text{H}$  NMR (400 MHz, Chloroform- $d$ ):  $\delta$  7.93 (d,  $J = 8.2$  Hz, 2H), 7.73 (d,  $J = 8.4$  Hz, 1H), 7.44 – 7.39 (m, 2H), 7.29 – 7.21 (m, 6H), 7.21 – 7.15 (m, 2H), 7.09 (d,  $J = 16.3$  Hz, 1H), 6.08 (d,  $J = 16.4$  Hz, 1H), 4.13 (dq,  $J = 10.8, 7.1$  Hz, 1H), 3.99 (dq,  $J = 10.8, 7.1$  Hz, 1H), 2.38 (s, 3H), 0.96 (t,  $J = 7.1$  Hz, 3H).  $^{13}\text{C}\{^1\text{H}\}$  NMR (101 MHz,  $\text{CDCl}_3$ ):  $\delta$  176.5, 170.3, 155.5, 141.7, 140.8, 136.4, 131.5, 129.5, 129.4, 129.1, 128.9, 128.5, 127.9, 126.5, 126.3, 125.1, 122.4, 121.2, 68.4, 62.0, 21.6, 13.80. HRMS (m/z):  $[\text{M}+\text{H}]^+$  calcd for  $\text{C}_{26}\text{H}_{24}\text{NO}_2$ : 382.1802; found: 382.1812.

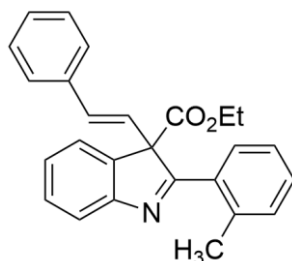

**Ethyl (E)-3-styryl-2-(o-tolyl)-3H-indole-3-carboxylate(3ak).** The reaction mixture was purified by silica gel column chromatography (petroleum ether /EtOAc =100:1-50:1, V/V) to obtain a yellow solid with a yield of 27% (20.2mg), m. p. 125-128°C. <sup>1</sup>H NMR (400 MHz, Chloroform-*d*): δ 7.75 (d, *J* = 7.7 Hz, 1H), 7.50 – 7.41 (m, 3H), 7.33 – 7.28 (m, 3H), 7.25 – 7.19 (m, 6H), 6.89 (d, *J* = 16.3 Hz, 1H), 6.15 (d, *J* = 16.3 Hz, 1H), 4.14 (dq, *J* = 10.8, 7.1 Hz, 1H), 4.05 (dq, *J* = 10.8, 7.1 Hz, 1H), 2.65 (s, 3H), 1.02 (t, *J* = 7.1 Hz, 3H). <sup>13</sup>C{<sup>1</sup>H} NMR (101 MHz, CDCl<sub>3</sub>): δ 177.1, 170.0, 156.2, 139.7, 136.4, 132.1, 132.0, 131.3, 129.7, 129.6, 129.1, 128.5, 127.9, 126.6, 126.5, 125.5, 124.5, 122.9, 121.6, 71.1, 62.0, 22.6, 13.8. HRMS (m/z): [M+H]<sup>+</sup> calcd for C<sub>26</sub>H<sub>24</sub>NO<sub>2</sub>: 382.1802; found: 382.1813.

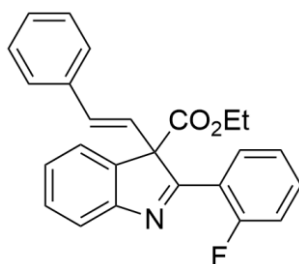

**Ethyl (E)-2-(2-fluorophenyl)-3-styryl-3H-indole-3-carboxylate(3ao).** The reaction mixture was purified by silica gel column chromatography (petroleum ether /EtOAc =100:1-50:1, V/V) to obtain a yellow liquid with a yield of 38% (28.7mg). <sup>1</sup>H NMR (400 MHz, Chloroform-*d*): δ 8.47 (td, *J* = 7.8, 1.8 Hz, 1H), 7.75 (d, *J* = 7.7 Hz, 1H), 7.49 – 7.42 (m, 3H), 7.34 – 7.26 (m, 2H), 7.23 (dd, *J* = 8.6, 7.2 Hz, 4H), 7.19 – 7.11 (m, 2H), 7.05 (dd, *J* = 16.4, 2.0 Hz, 1H), 6.04 (d, *J* = 16.4 Hz, 1H), 4.23 – 4.15 (m, 1H), 4.01 (dq, *J* = 10.7, 7.1 Hz, 1H), 1.04 (t, *J* = 7.1 Hz, 3H). <sup>13</sup>C{<sup>1</sup>H} NMR (101 MHz, CDCl<sub>3</sub>): δ 173.4, 169.5, 160.8 (d, *J* = 254.5 Hz), 154.2, 140.0, 136.5, 133.1 (d, *J* = 10.1 Hz), 130.8 (d, *J* = 3.0 Hz), 130.6 (d, *J* = 2.0 Hz), 129.2, 128.4, 127.8, 126.9, 126.5, 124.7 (d, *J* = 3.0 Hz), 124.1 (d, *J* = 4.0 Hz), 122.8, 121.5, 120.4 (d, *J* = 10.1 Hz), 116.6 (d, *J* = 24.2 Hz), 70.1, 61.9, 13.8. <sup>19</sup>F NMR (367 MHz, CDCl<sub>3</sub>): δ -110.24. HRMS (m/z): [M+H]<sup>+</sup> calcd for C<sub>25</sub>H<sub>21</sub>FNO<sub>2</sub>: 386.1551; found: 386.1562.

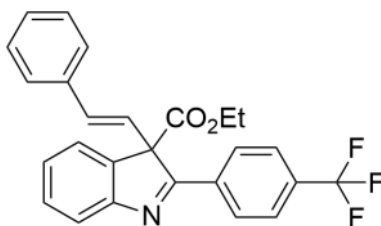

**Ethyl (E)-3-styryl-2-(4-(trifluoromethyl)phenyl)-3H-indole-3-carboxylate(3ap).**

The reaction mixture was purified by silica gel column chromatography (petroleum ether /EtOAc =100:1-50:1, V/V) to obtain a yellow liquid with a yield of 65% (56.1mg). <sup>1</sup>H NMR (400 MHz, Chloroform-*d*) δ: 8.17 (d, *J* = 8.3 Hz, 2H), 7.78 (d, *J* = 8.1 Hz, 1H), 7.70 (d, *J* = 8.4 Hz, 2H), 7.46 (dt, *J* = 6.9, 3.5 Hz, 2H), 7.31 (t, *J* = 7.5 Hz, 1H), 7.28 – 7.22 (m, 4H), 7.21 – 7.18 (m, 1H), 7.07 (d, *J* = 17.2 Hz, 1H), 6.10 (d, *J* = 16.4 Hz, 1H), 4.15 (dq, *J* = 10.8, 7.1 Hz, 1H), 4.02 (dq, *J* = 10.8, 7.1 Hz, 1H), 0.98 (t, *J* = 7.1 Hz, 3H). <sup>13</sup>C{<sup>1</sup>H} NMR (101 MHz, CDCl<sub>3</sub>): δ 174.9, 169.7, 154.8, 141.0, 136.0, 135.4, 132.6, 132.3, 131.8, 129.4, 129.0, 128.6, 128.2, 127.3, 126.5, 125.6(q, *J* = 4 Hz), 124.2, 122.5, 121.9, 68.5, 62.3, 13.8. <sup>19</sup>F NMR (376 MHz, CDCl<sub>3</sub>): δ -62.91. HRMS (m/z): [M+H]<sup>+</sup> calcd for C<sub>26</sub>H<sub>21</sub>F<sub>3</sub>NO<sub>2</sub>: 436.1519; found: 436.1531.

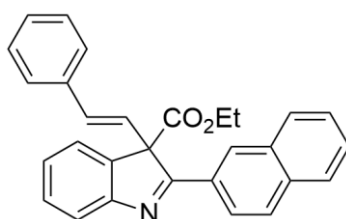

**Ethyl (E)-2-(naphthalen-2-yl)-3-styryl-3H-indole-3-carboxylate(3aq).** The reaction mixture was purified by silica gel column chromatography (petroleum ether /EtOAc =100:1-50:1, V/V) to obtain a yellow solid with a yield of 67% (56.6mg), m. p. 75-80°C. <sup>1</sup>H NMR (400 MHz, Chloroform-*d*): δ 8.41 (s, 1H), 8.27 (dd, *J* = 8.7, 1.7 Hz, 1H), 7.94 – 7.88 (m, 2H), 7.81 (dd, *J* = 16.1, 7.6 Hz, 2H), 7.48 (dt, *J* = 20.4, 7.2 Hz, 4H), 7.31 – 7.26 (m, 1H), 7.25 – 7.20 (m, 3H), 7.19 – 7.16 (m, 2H), 7.14 (dt, *J* = 5.9, 2.3 Hz, 1H), 6.14 (d, *J* = 16.4 Hz, 1H), 4.14 (dq, *J* = 10.8, 7.1 Hz, 1H), 4.04 – 3.96 (m, 1H), 0.93 (t, *J* = 7.1 Hz, 3H). <sup>13</sup>C{<sup>1</sup>H} NMR (101 MHz, CDCl<sub>3</sub>): δ 176.4, 170.3, 155.3, 141.0, 136.3, 134.7, 133.0, 131.6, 129.7, 129.6, 129.2, 128.5, 128.0, 127.8, 126.7, 126.6, 126.6, 125.3, 125.1, 122.4, 121.5, 68.5, 62.2, 13.8. HRMS (m/z): [M+H]<sup>+</sup> calcd for C<sub>29</sub>H<sub>24</sub>NO<sub>2</sub>: 418.1802; found: 418.1810.

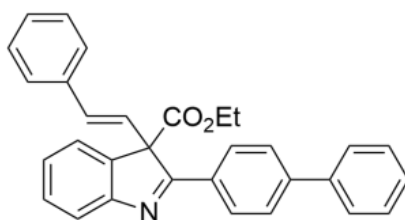

**Ethyl (E)-2-([1,1'-biphenyl]-4-yl)-3-styryl-3H-indole-3-carboxylate(3ar).** The reaction mixture was purified by silica gel column chromatography (petroleum ether /EtOAc =100:1-50:1, V/V) to obtain a yellow solid with a yield of 65% (56.3mg), m. p. 80-85°C. <sup>1</sup>H NMR (400 MHz, Chloroform-*d*): δ 8.12 (d, *J* = 8.6 Hz, 2H), 7.76 (d, *J* = 8.3 Hz, 1H), 7.68 (d, *J* = 8.6 Hz, 2H), 7.65 – 7.61 (m, 2H), 7.47 – 7.41 (m, 4H), 7.36 (t, *J* = 7.3 Hz, 1H), 7.31 – 7.25 (m, 3H), 7.25 – 7.21 (m, 2H), 7.19 (d, *J* = 8.0 Hz, 1H), 7.13 (d, *J* = 16.3 Hz, 1H), 6.14 (d, *J* = 16.4 Hz, 1H), 4.16 (dq, *J* = 10.8, 7.1 Hz, 1H), 4.07 – 3.99 (m, 1H), 0.99 (t, *J* = 7.1 Hz, 3H). <sup>13</sup>C{<sup>1</sup>H} NMR (101 MHz, CDCl<sub>3</sub>):

$\delta$  176.1, 170.2, 155.4, 143.8, 140.9, 140.0, 136.4, 131.6, 131.0, 129.4, 129.2, 128.9, 128.5, 128.0, 127.3, 127.1, 126.6, 125.0, 122.4, 121.4, 68.5, 62.2, 13.8. HRMS (m/z): [M+H]<sup>+</sup> calcd for C<sub>31</sub>H<sub>26</sub>NO<sub>2</sub>: 444.1958; found: 444.1972.

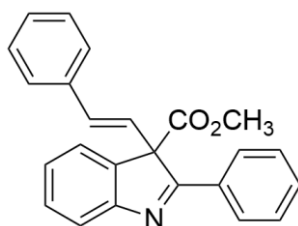

**Methyl (E)-2-phenyl-3-styryl-3H-indole-3-carboxylate(3as).** The reaction mixture was purified by silica gel column chromatography (petroleum ether /EtOAc =100:1-50:1, V/V) to obtain a yellow solid with a yield of 42% (30.9mg), m. p. 135-140°C. <sup>1</sup>H NMR (400 MHz, Chloroform-*d*):  $\delta$  8.03 (dd, *J* = 7.3, 2.5 Hz, 2H), 7.76 (d, *J* = 7.7 Hz, 1H), 7.47 – 7.41 (m, 5H), 7.29 (d, *J* = 6.6 Hz, 1H), 7.25 – 7.18 (m, 5H), 7.09 (d, *J* = 16.4 Hz, 1H), 6.09 (d, *J* = 16.4 Hz, 1H), 3.58 (s, 3H). <sup>13</sup>C{<sup>1</sup>H} NMR (101 MHz, CDCl<sub>3</sub>):  $\delta$  176.3, 170.8, 155.3, 140.7, 136.3, 132.0, 131.6, 131.3, 129.7, 129.3, 128.8, 128.8, 128.5, 128.0, 126.7, 126.6, 124.7, 122.5, 121.5, 68.2, 53.3. HRMS (m/z): [M+H]<sup>+</sup> calcd for C<sub>24</sub>H<sub>20</sub>NO<sub>2</sub>: 354.1313; found: 354.1316.

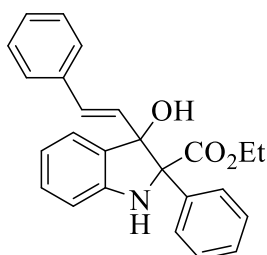

**Ethyl (E)-3-hydroxy-2-phenyl-3-styrylindoline-2-carboxylate(4).** The reaction mixture was purified by silica gel column chromatography (petroleum ether /EtOAc =100:1-50:1, V/V) to obtain a yellow solid with a yield of 61% (237mg), m. p. 125-130°C. <sup>1</sup>H NMR (400 MHz, Chloroform-*d*):  $\delta$  7.60 (d, *J* = 6.9 Hz, 2H), 7.28 (dd, *J* = 10.8, 7.3 Hz, 3H), 7.22 – 7.06 (m, 6H), 7.02 (d, *J* = 6.9 Hz, 2H), 6.89 – 6.79 (m, 2H), 6.45 (d, *J* = 15.9 Hz, 1H), 5.75 (d, *J* = 15.9 Hz, 1H), 5.29 (s, 1H), 4.16 – 4.09 (m, 2H), 1.13 (t, *J* = 7.1 Hz, 3H). <sup>13</sup>C NMR (101 MHz, CDCl<sub>3</sub>):  $\delta$  174.3, 147.7, 137.0, 136.7, 132.0, 130.1, 129.6, 128.9, 128.4, 128.3, 128.3, 127.3, 126.6, 126.3, 124.3, 120.6, 110.3, 85.9, 79.5, 62.2, 13.9. HRMS (m/z): [M+H]<sup>+</sup> calcd for C<sub>25</sub>H<sub>23</sub>NO<sub>3</sub>: 386.1577; found: 386.1581.

## 2. $^1\text{H}$ and $^{13}\text{C}$ NMR spectra for all products

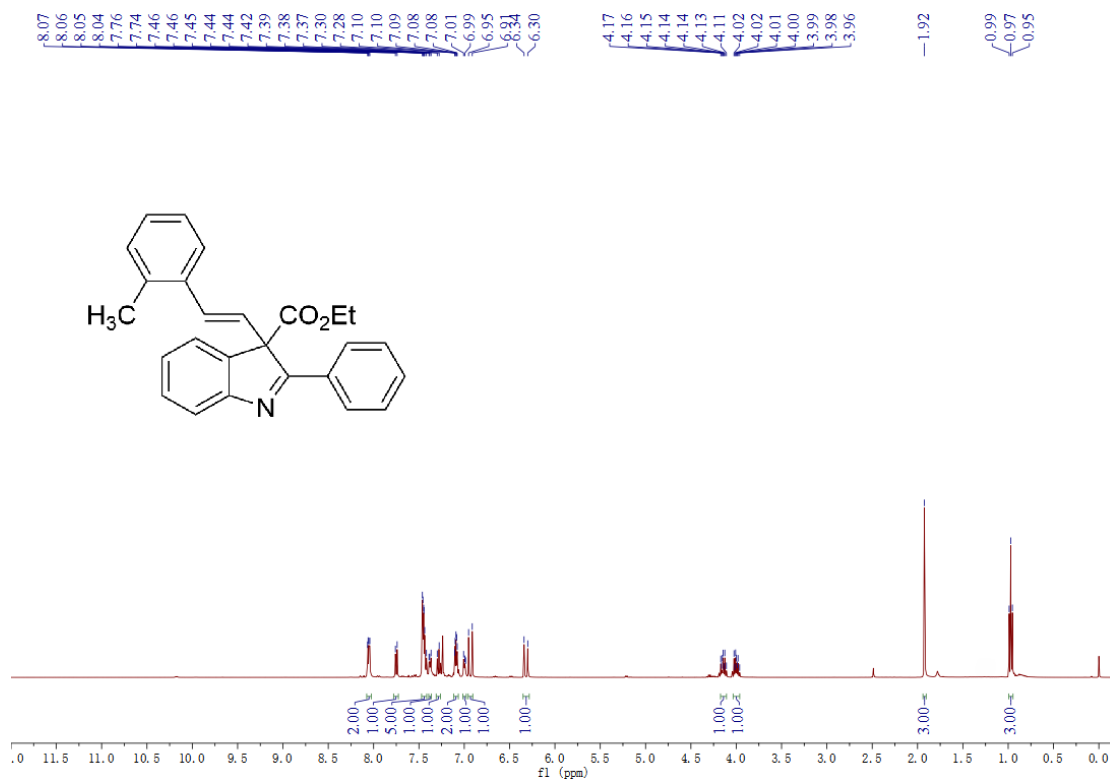

Figure S1  $^1\text{H}$  NMR (400 MHz,  $\text{CDCl}_3$ ) spectra of **3ba**

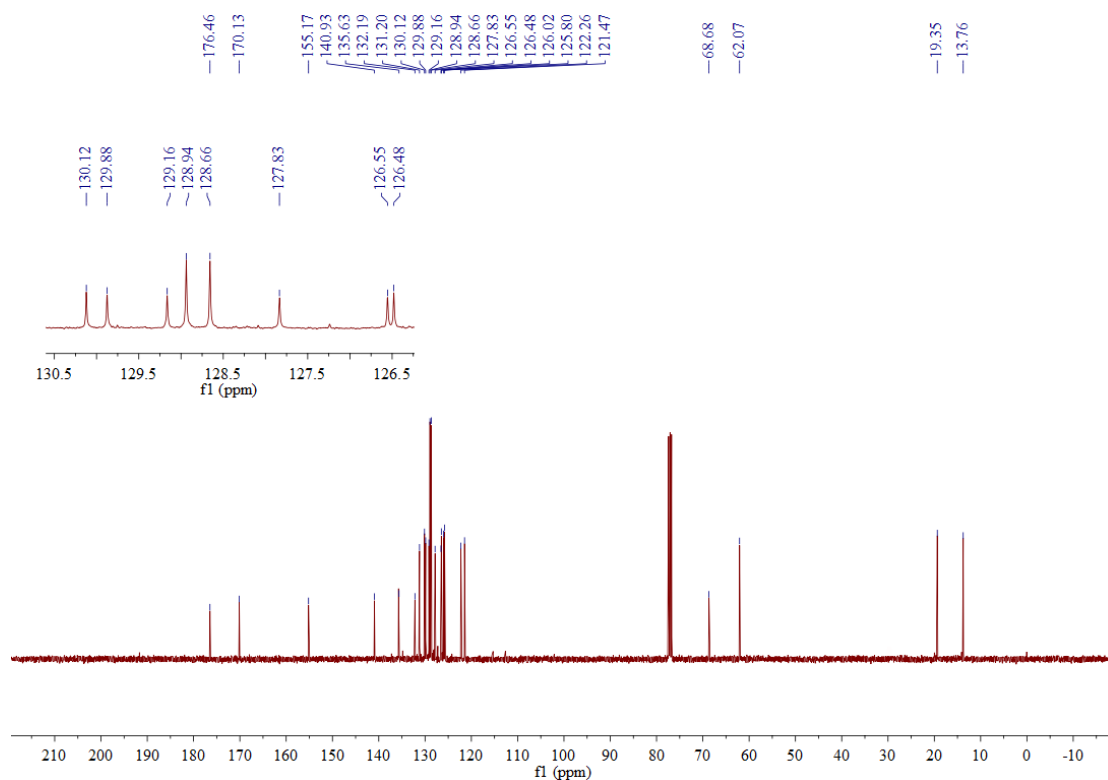

Figure S2  $^{13}\text{C}$  NMR (101 MHz,  $\text{CDCl}_3$ ) spectra of **3ba**

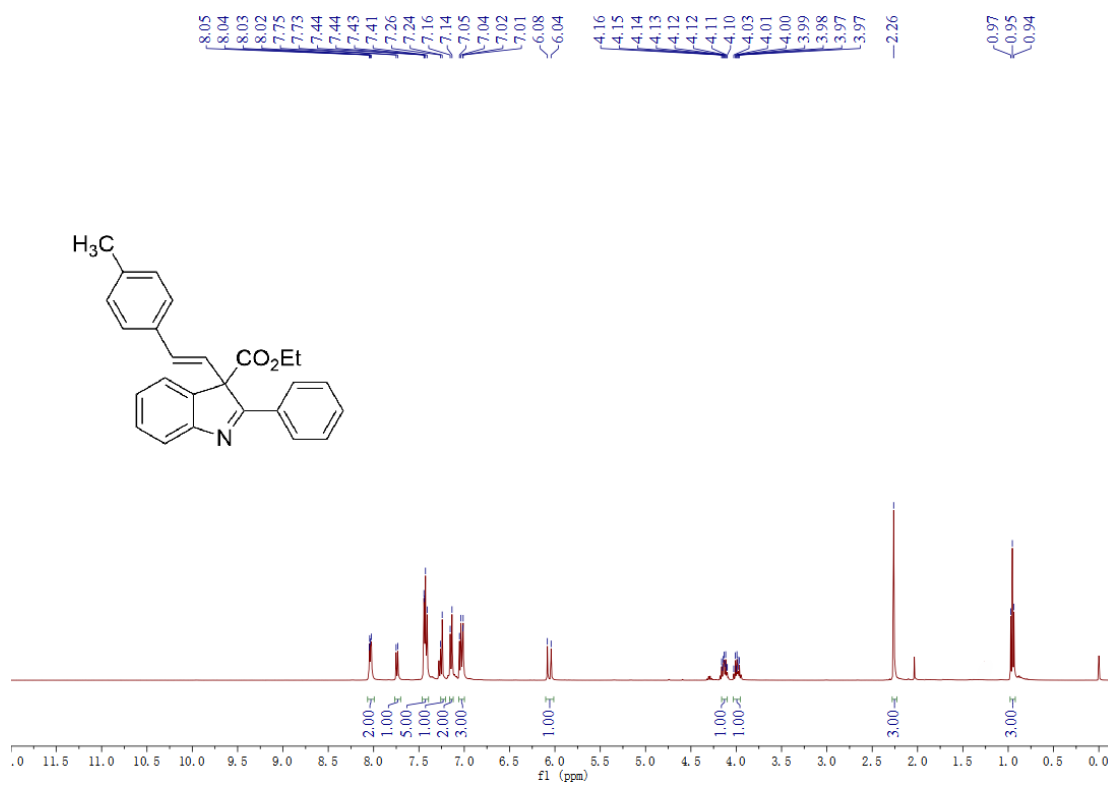

Figure S3  $^1\text{H}$  NMR (400 MHz,  $\text{CDCl}_3$ ) spectra of **3ca**



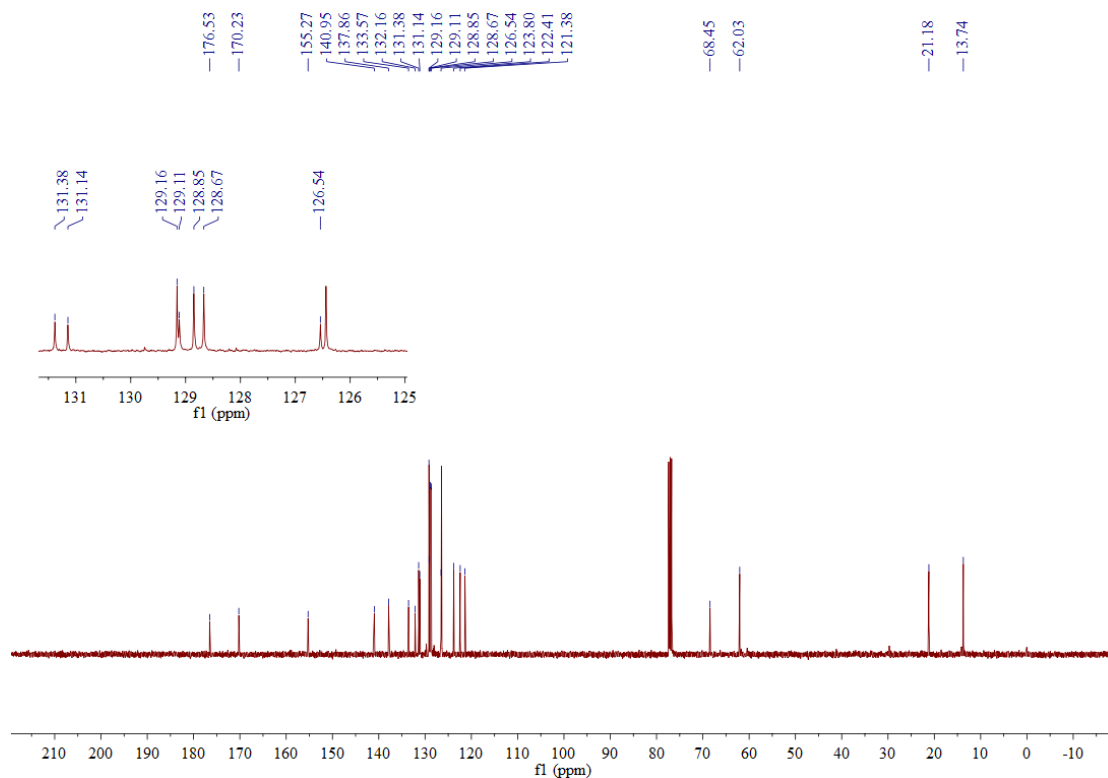

Figure S4 <sup>13</sup>C NMR (101 MHz, CDCl<sub>3</sub>) spectra of **3ca**

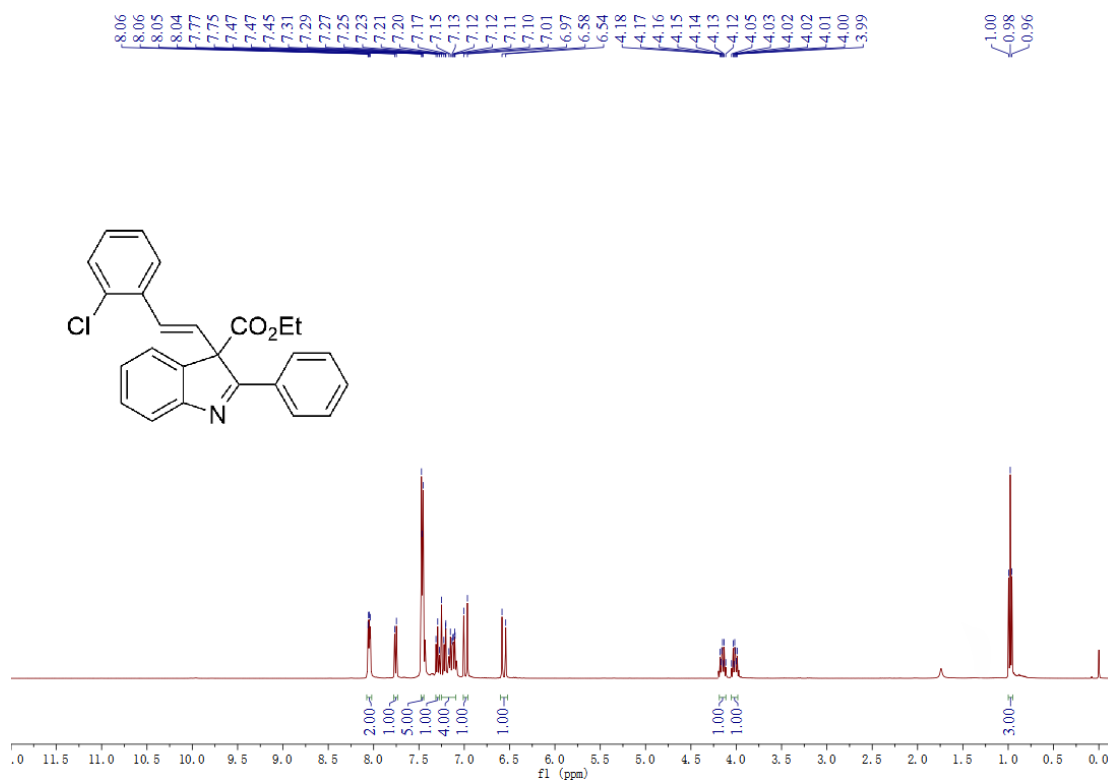

Figure S5 <sup>1</sup>H NMR (400 MHz, CDCl<sub>3</sub>) spectra of **3da**

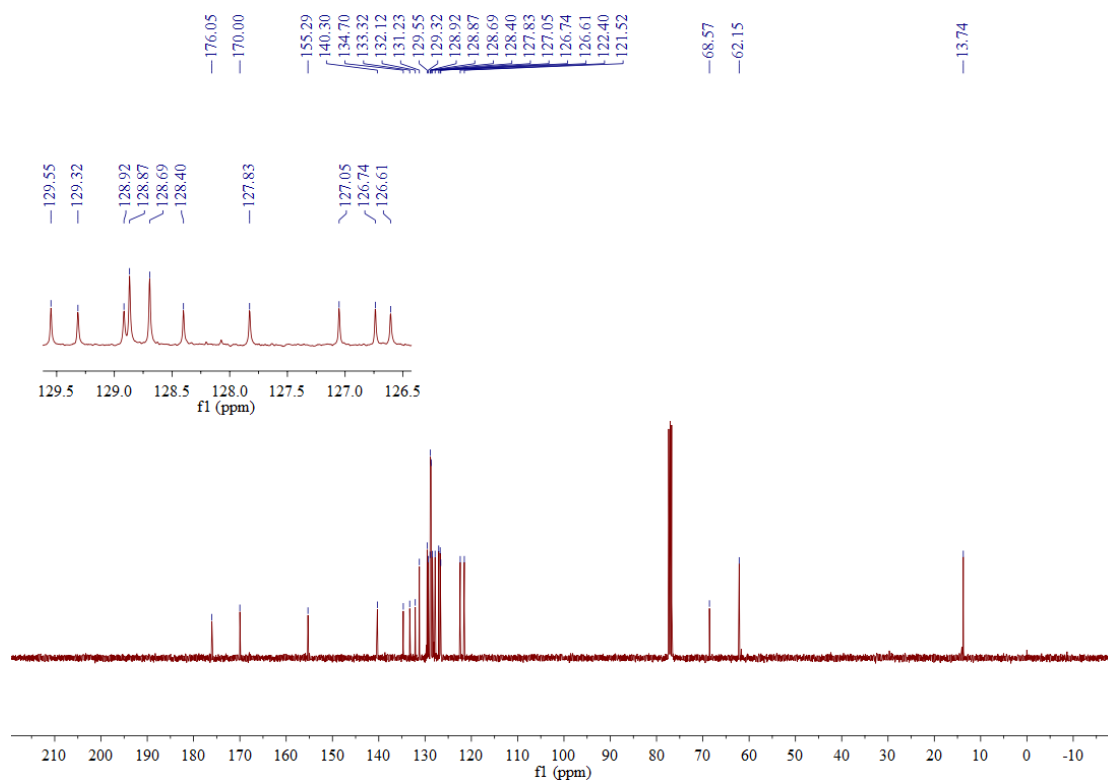

Figure S6  $^{13}\text{C}$  NMR (101 MHz,  $\text{CDCl}_3$ ) spectra of **3da**

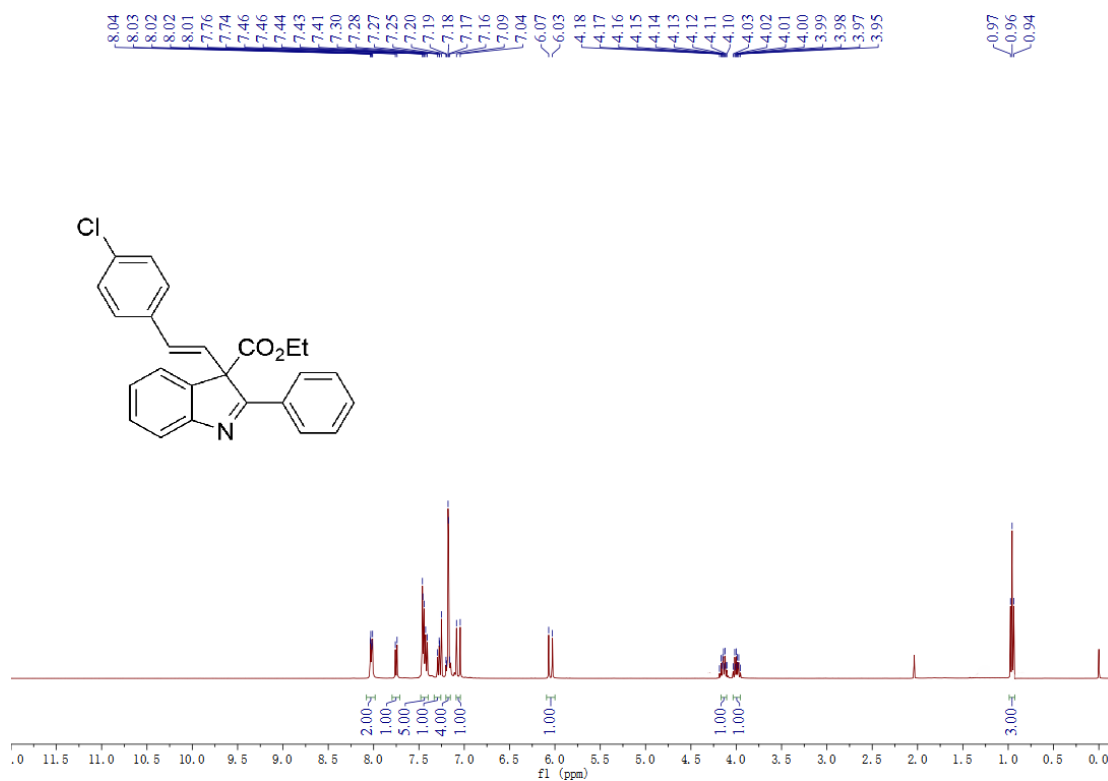

Figure S7  $^1\text{H}$  NMR (400 MHz,  $\text{CDCl}_3$ ) spectra of **3ea**

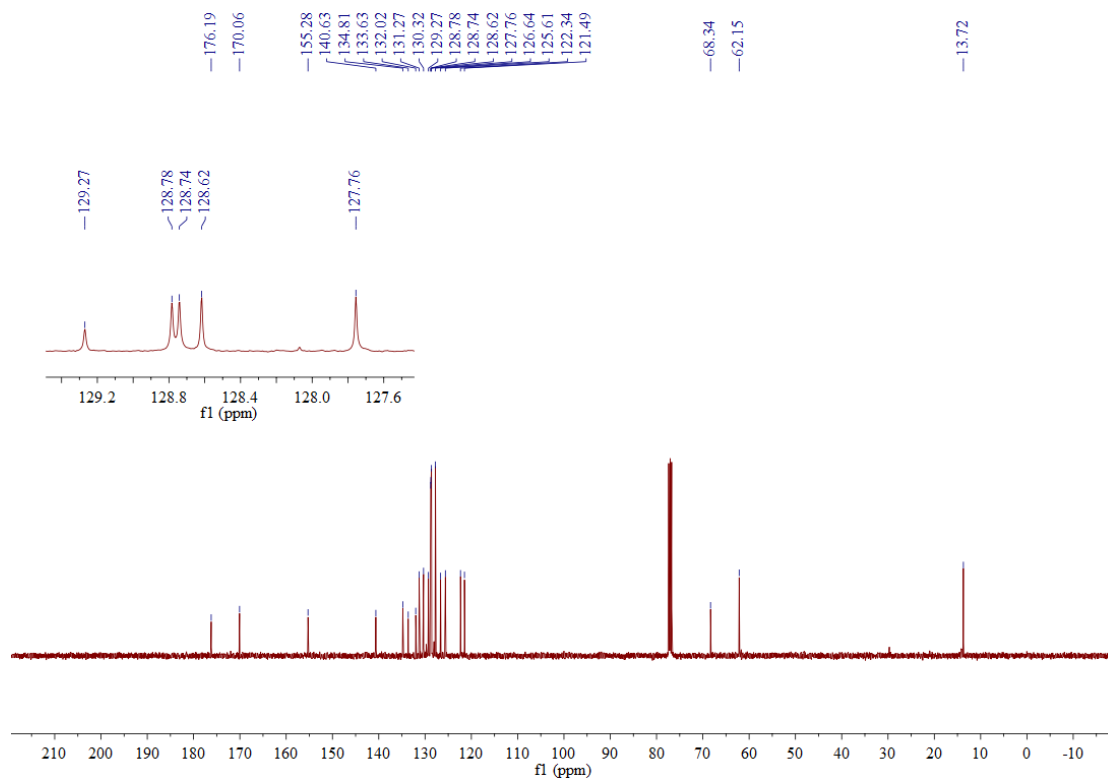

Figure S8  $^{13}\text{C}$  NMR (101 MHz,  $\text{CDCl}_3$ ) spectra of **3ea**

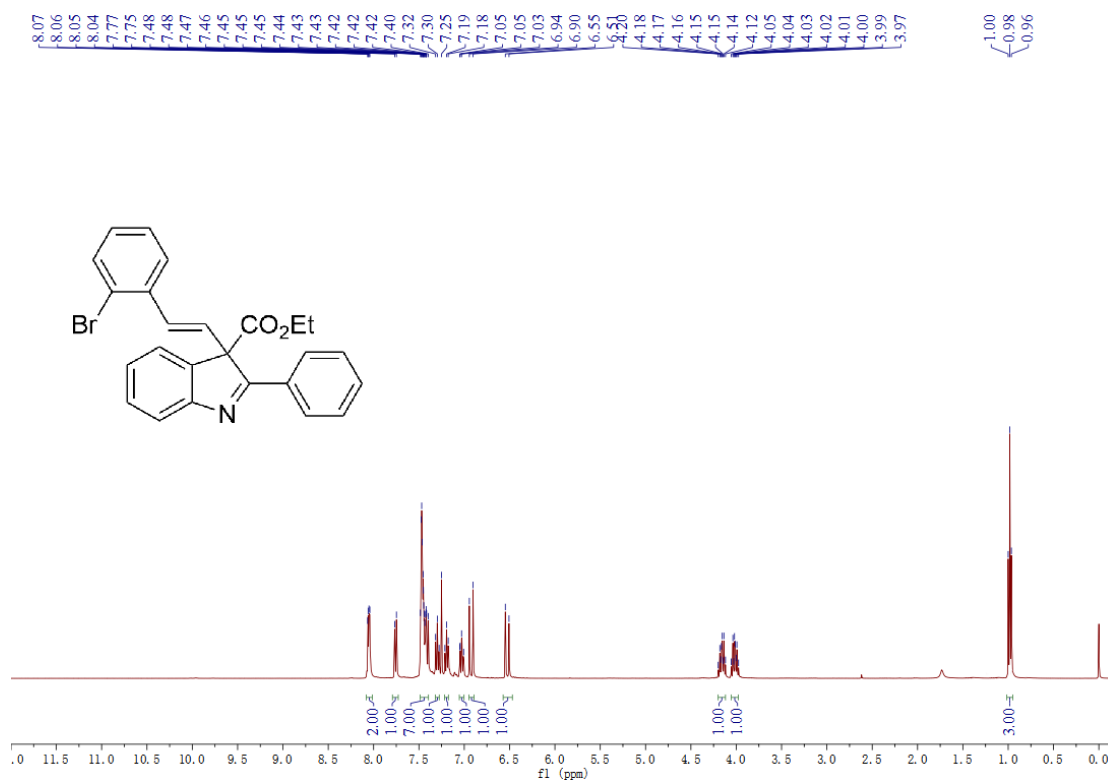

Figure S9  $^1\text{H}$  NMR (400 MHz,  $\text{CDCl}_3$ ) spectra of **3fa**

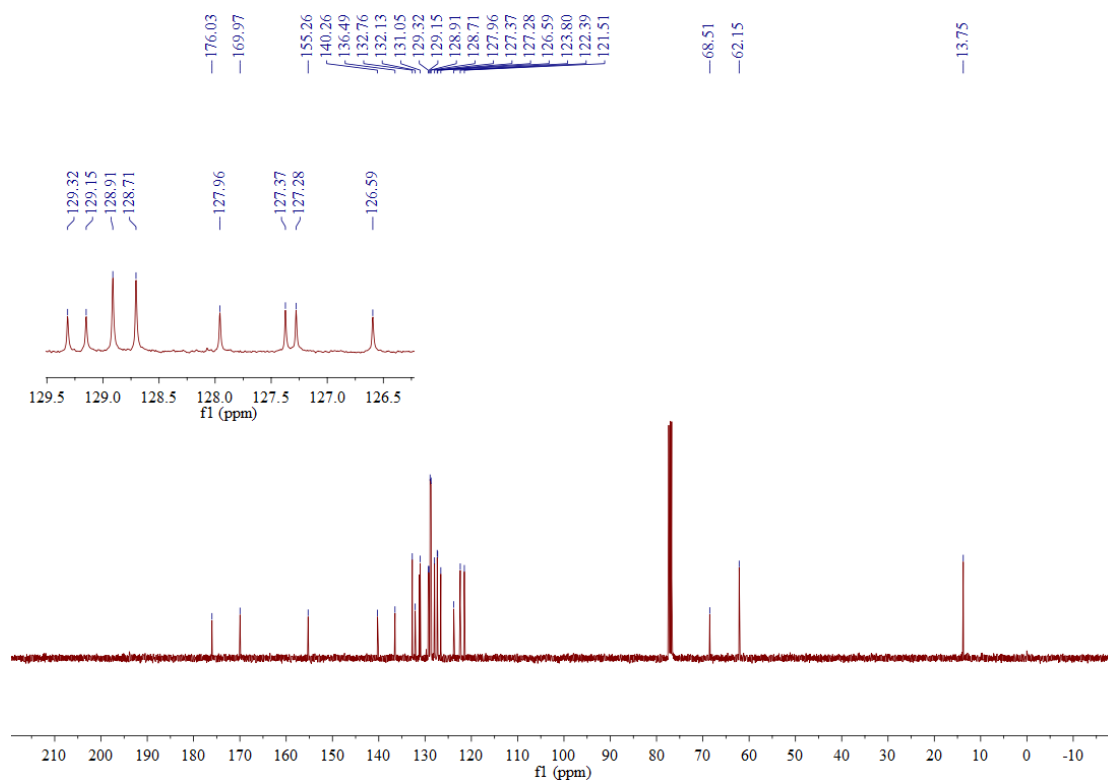

Figure S10  $^{13}\text{C}$  NMR (101 MHz,  $\text{CDCl}_3$ ) spectra of **3fa**

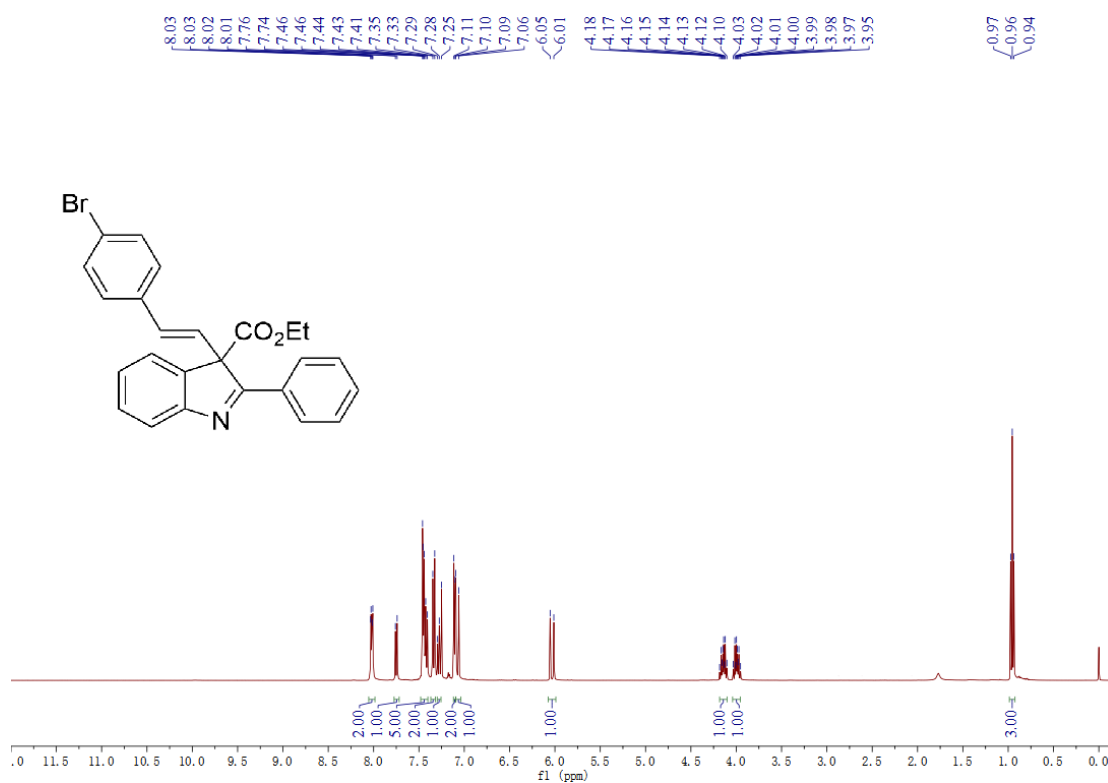

Figure S11  $^1\text{H}$  NMR (400 MHz,  $\text{CDCl}_3$ ) spectra of **3ga**



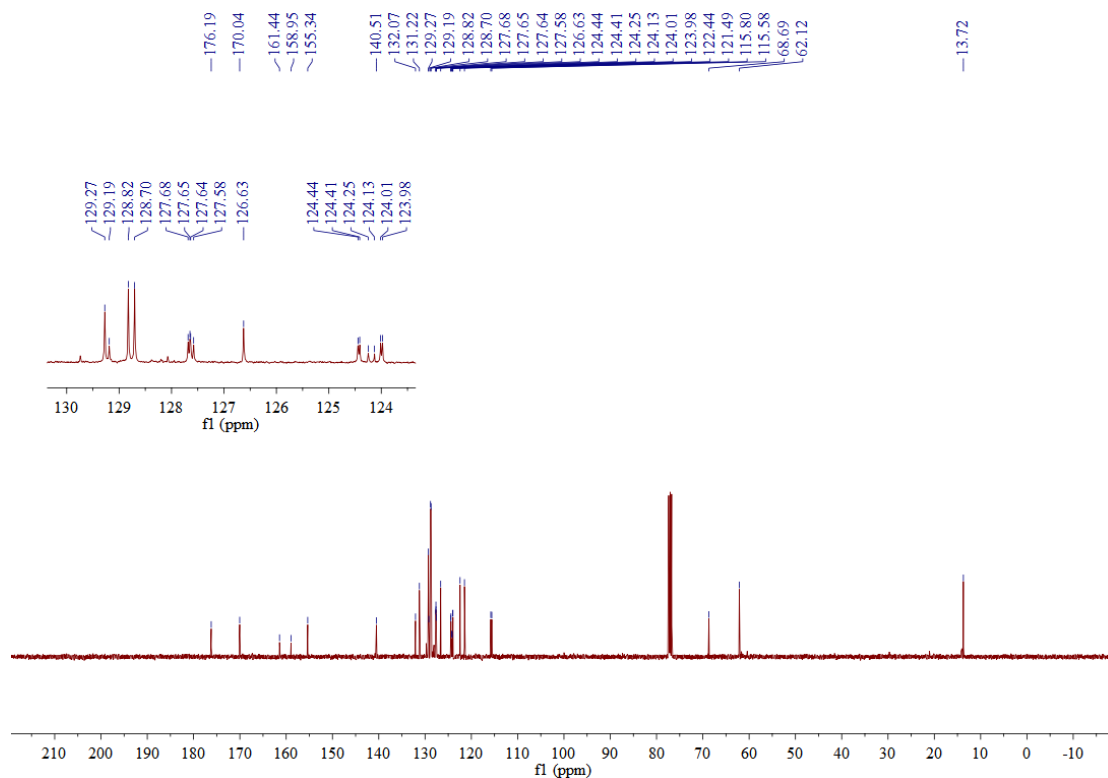

Figure S14  $^{13}\text{C}$  NMR (101 MHz,  $\text{CDCl}_3$ ) spectra of **3ha**

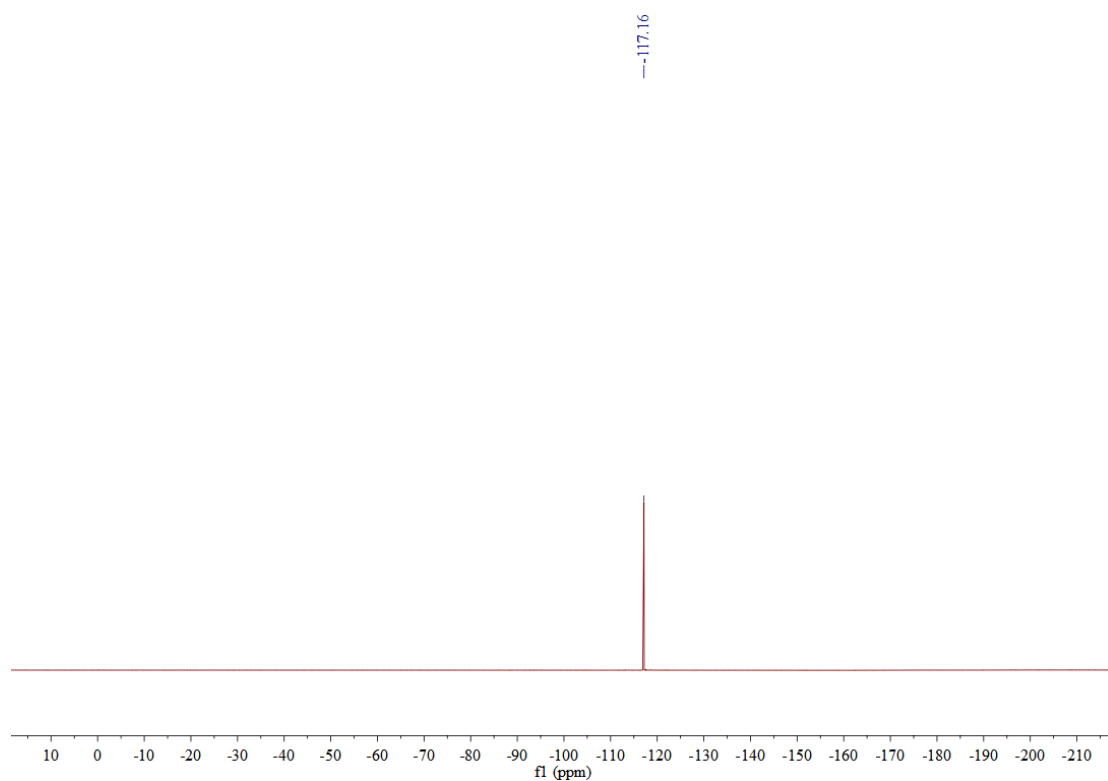

Figure S15  $^{19}\text{F}$  NMR (376 MHz,  $\text{CDCl}_3$ ) spectra of **3ha**

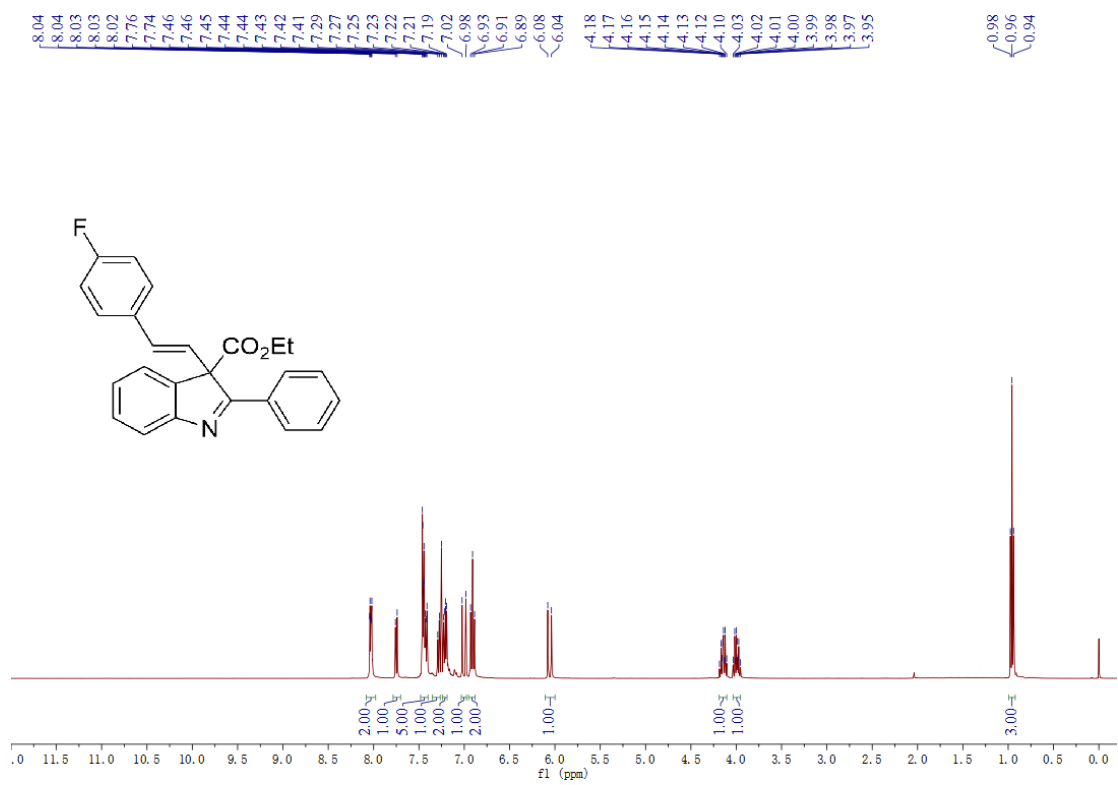

Figure S16 <sup>1</sup>H NMR (400 MHz, CDCl<sub>3</sub>) spectra of **3ia**

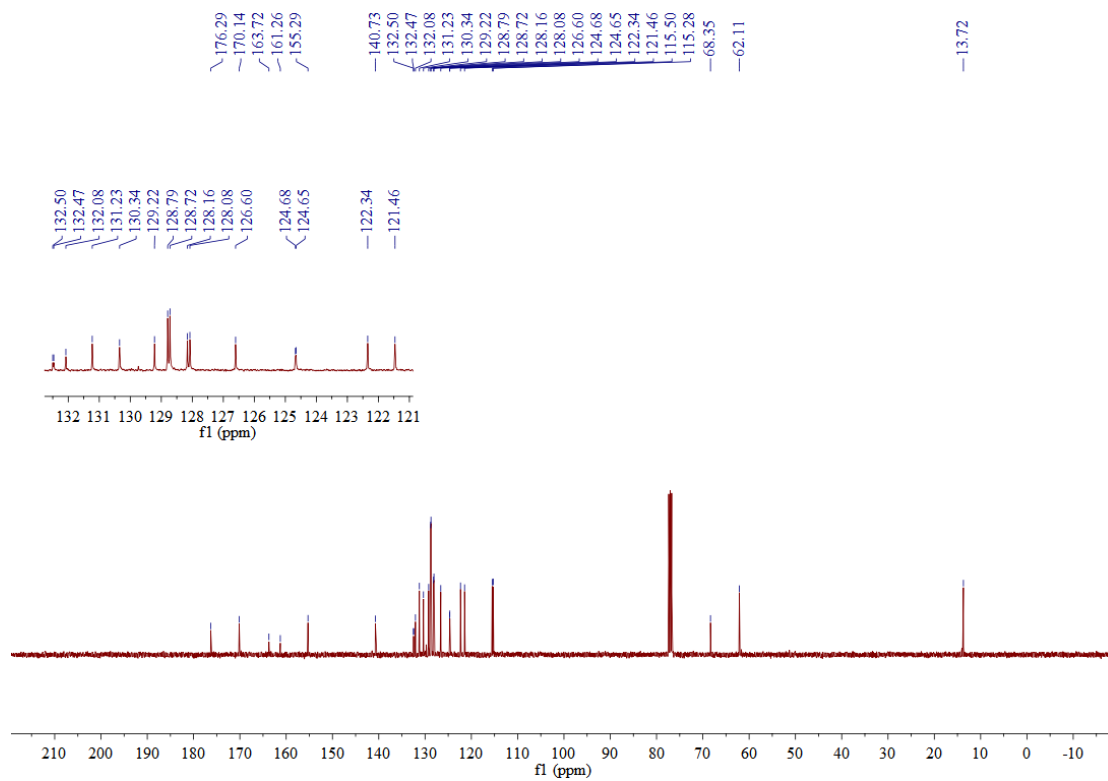

Figure S17  $^{13}\text{C}$  NMR (101 MHz,  $\text{CDCl}_3$ ) spectra of **3ia**

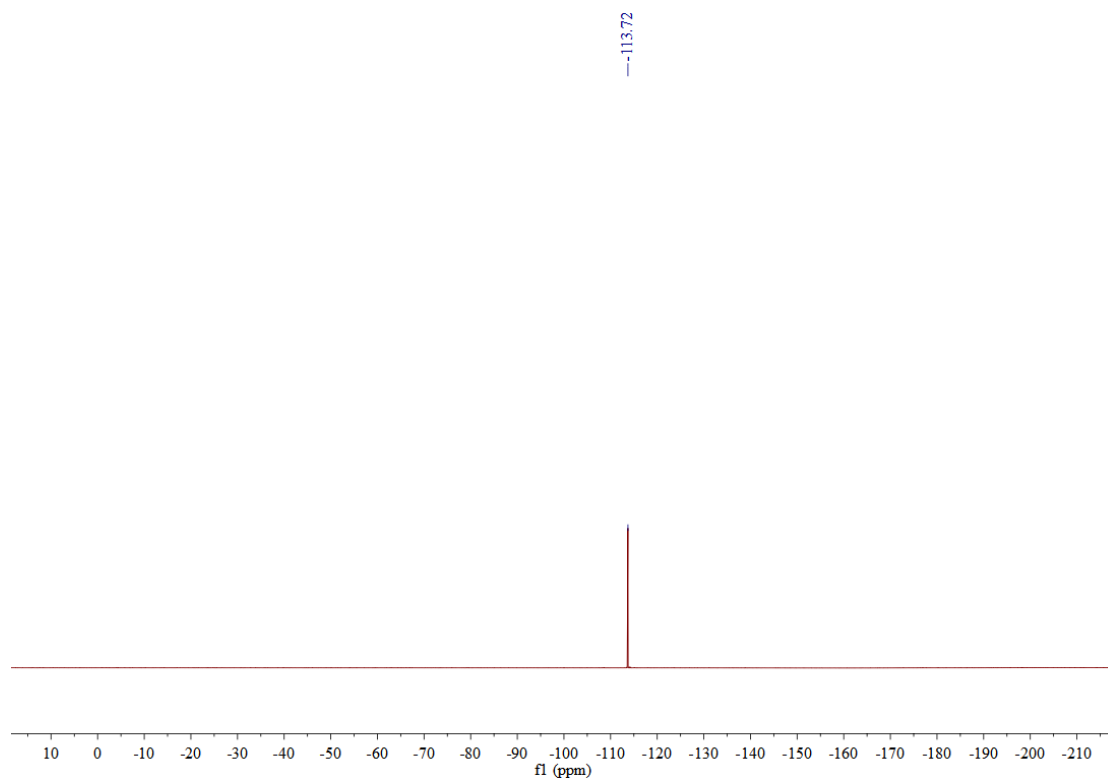

Figure S18  $^{19}\text{F}$  NMR (376 MHz,  $\text{CDCl}_3$ ) spectra of **3ia**



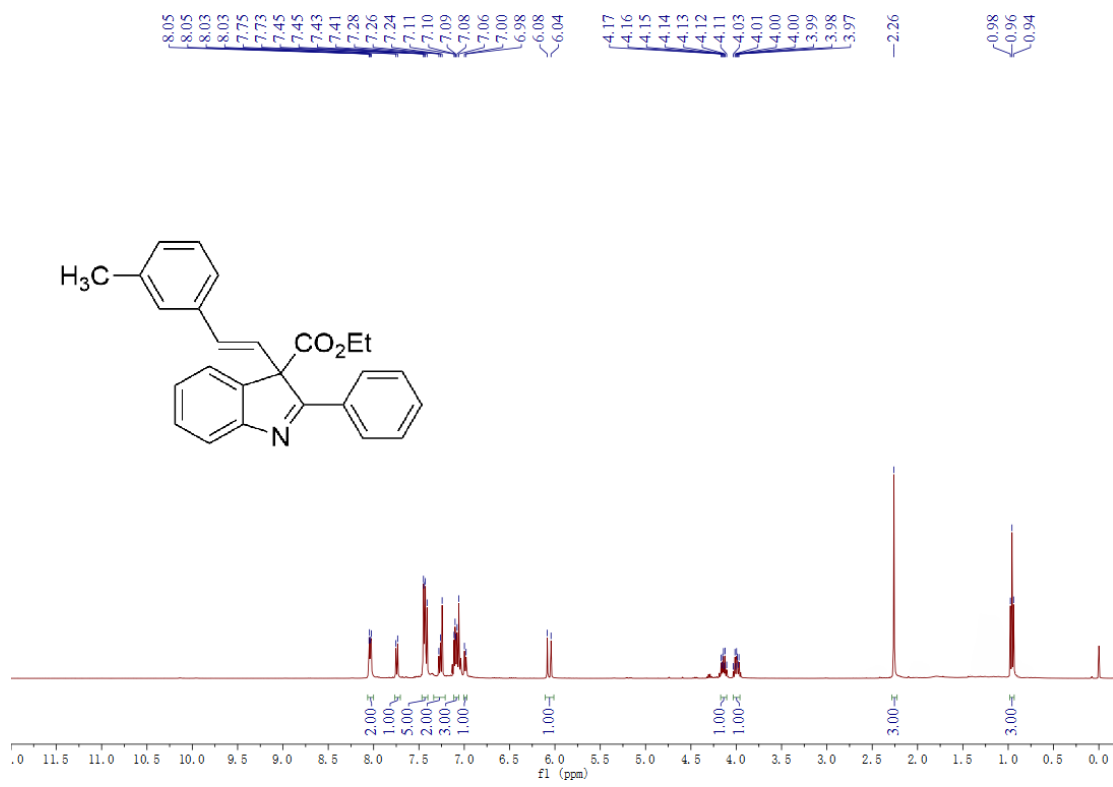

Figure S19 <sup>1</sup>H NMR (400 MHz, CDCl<sub>3</sub>) spectra of **3ja**

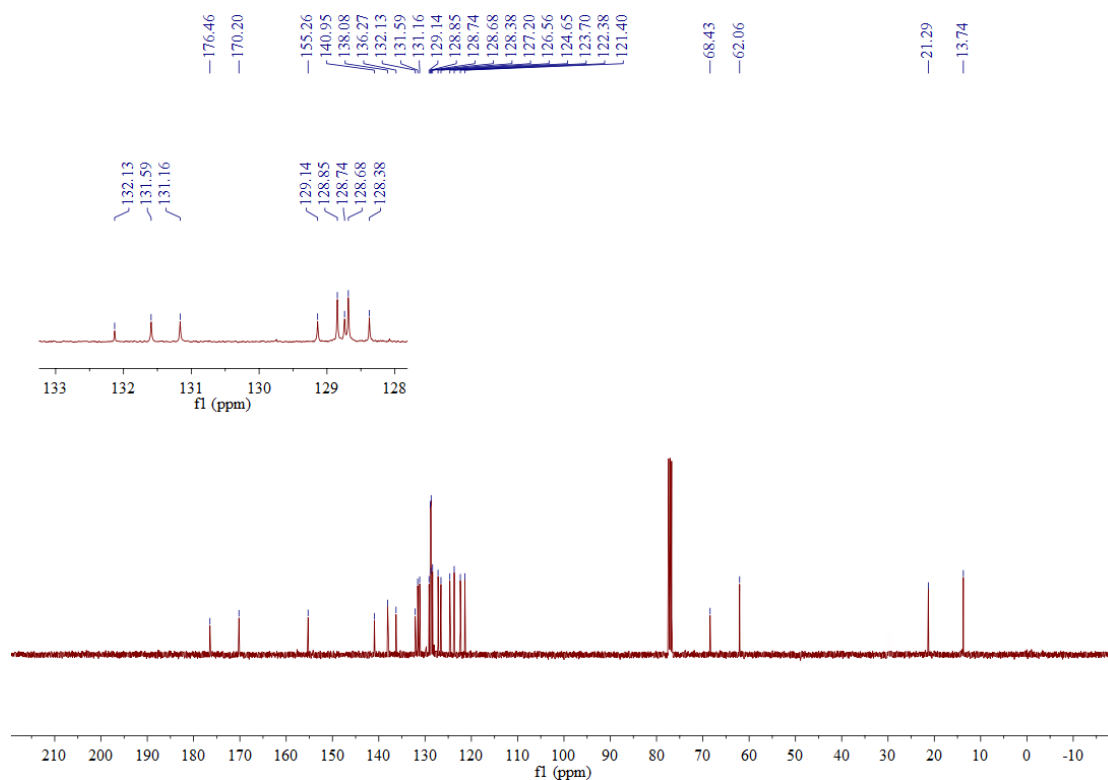

Figure S20  $^{13}\text{C}$  NMR (101 MHz,  $\text{CDCl}_3$ ) spectra of **3ja**

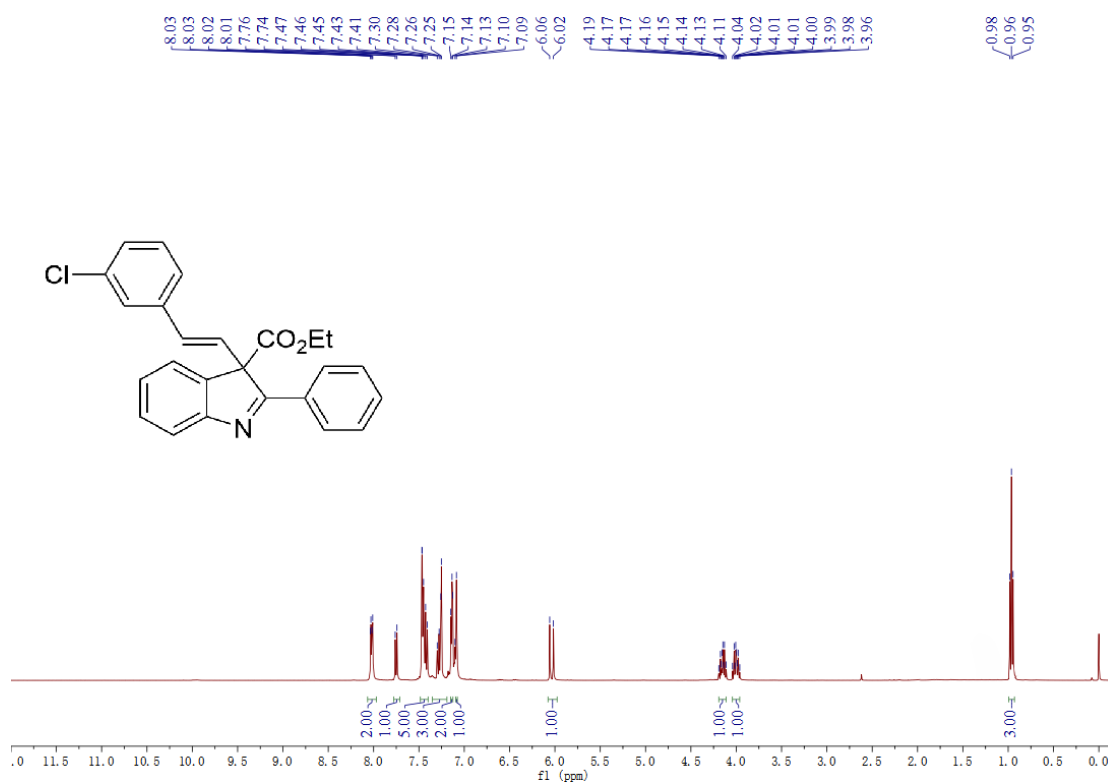

Figure S21  $^1\text{H}$  NMR (400 MHz,  $\text{CDCl}_3$ ) spectra of **3ka**

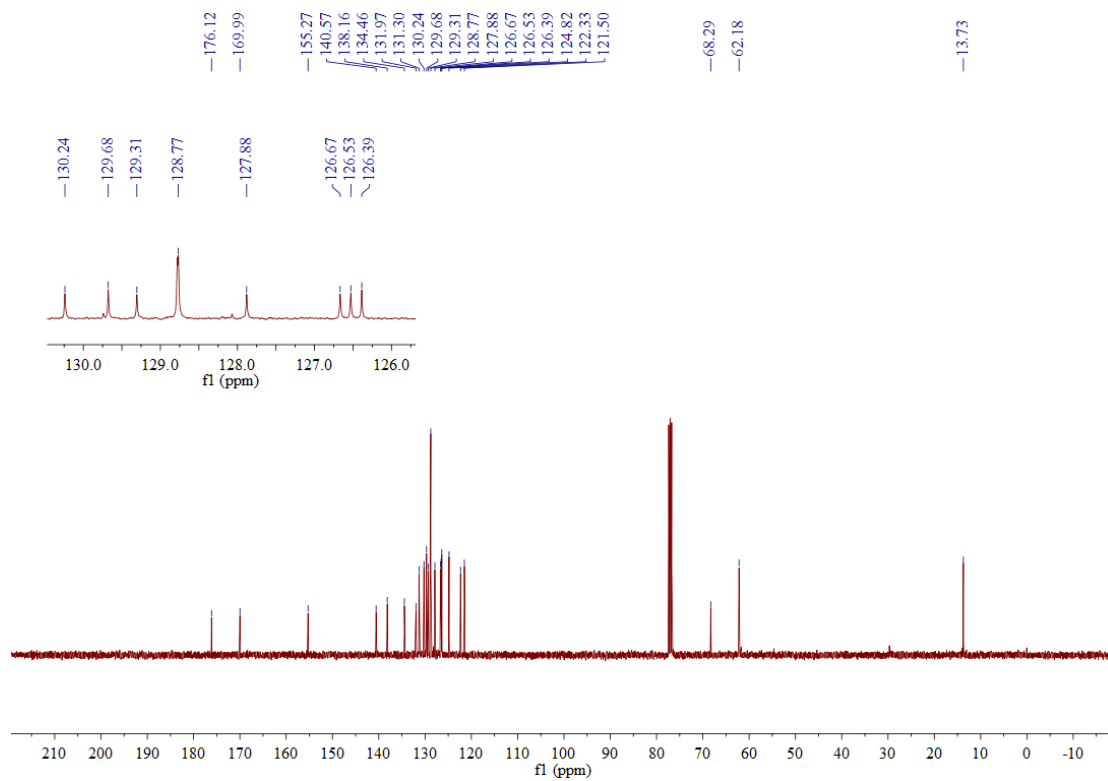

Figure S22  $^{13}\text{C}$  NMR (101 MHz,  $\text{CDCl}_3$ ) spectra of **3ka**

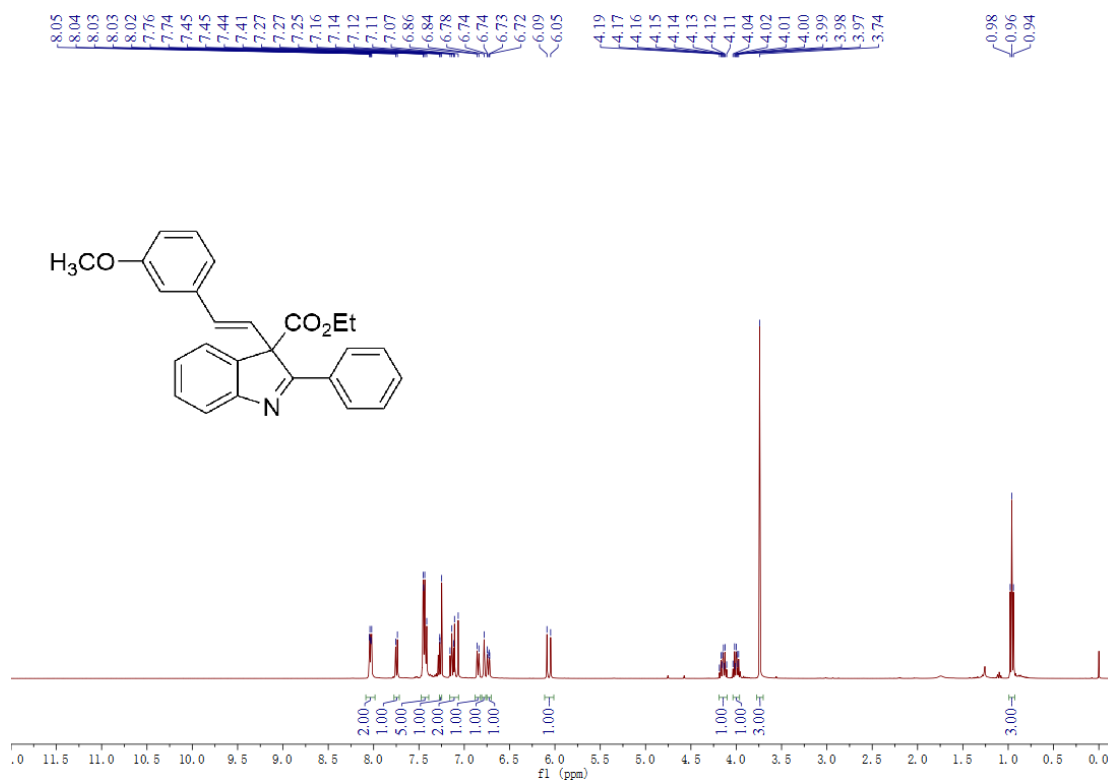

Figure S23  $^1\text{H}$  NMR (400 MHz,  $\text{CDCl}_3$ ) spectra of **3la**

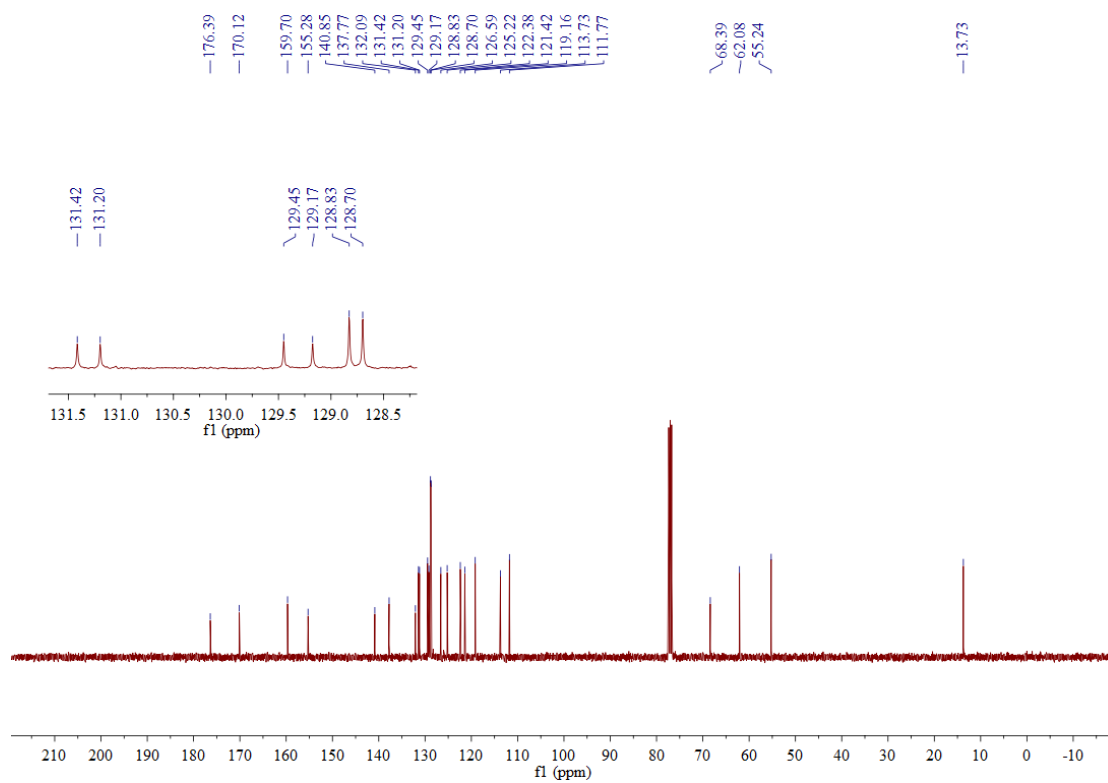

Figure S24  $^{13}\text{C}$  NMR (101 MHz,  $\text{CDCl}_3$ ) spectra of **3la**

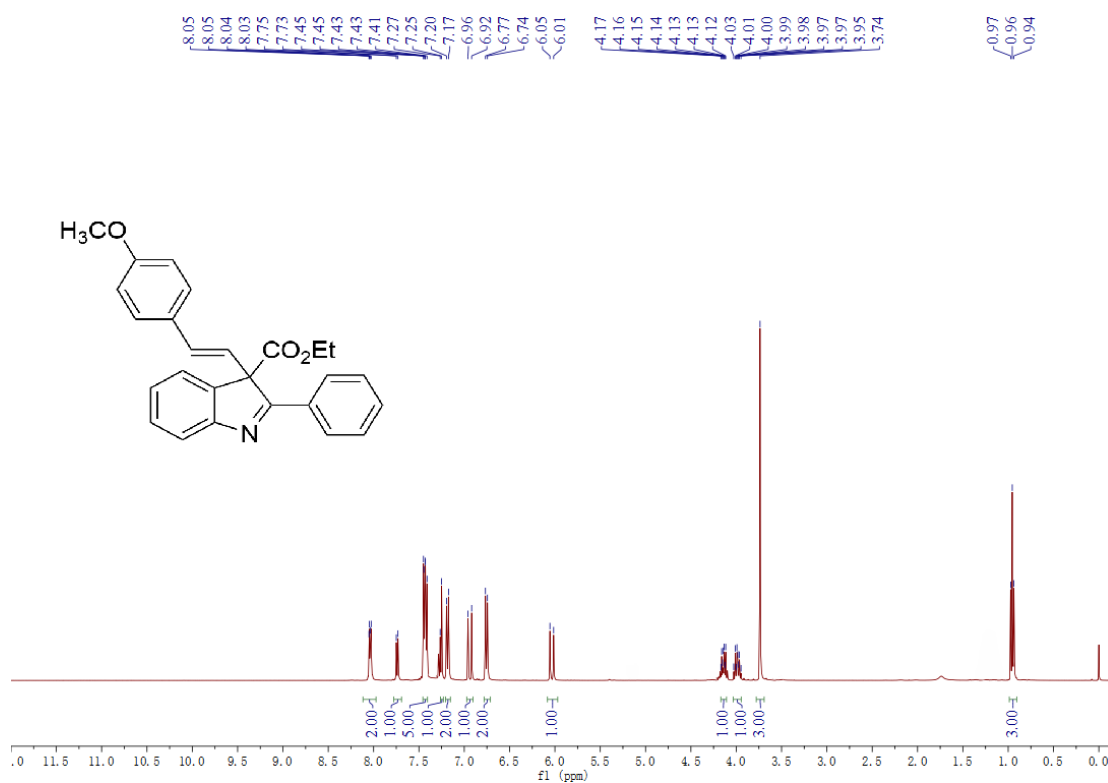

Figure S25  $^1\text{H}$  NMR (400 MHz,  $\text{CDCl}_3$ ) spectra of **3ma**

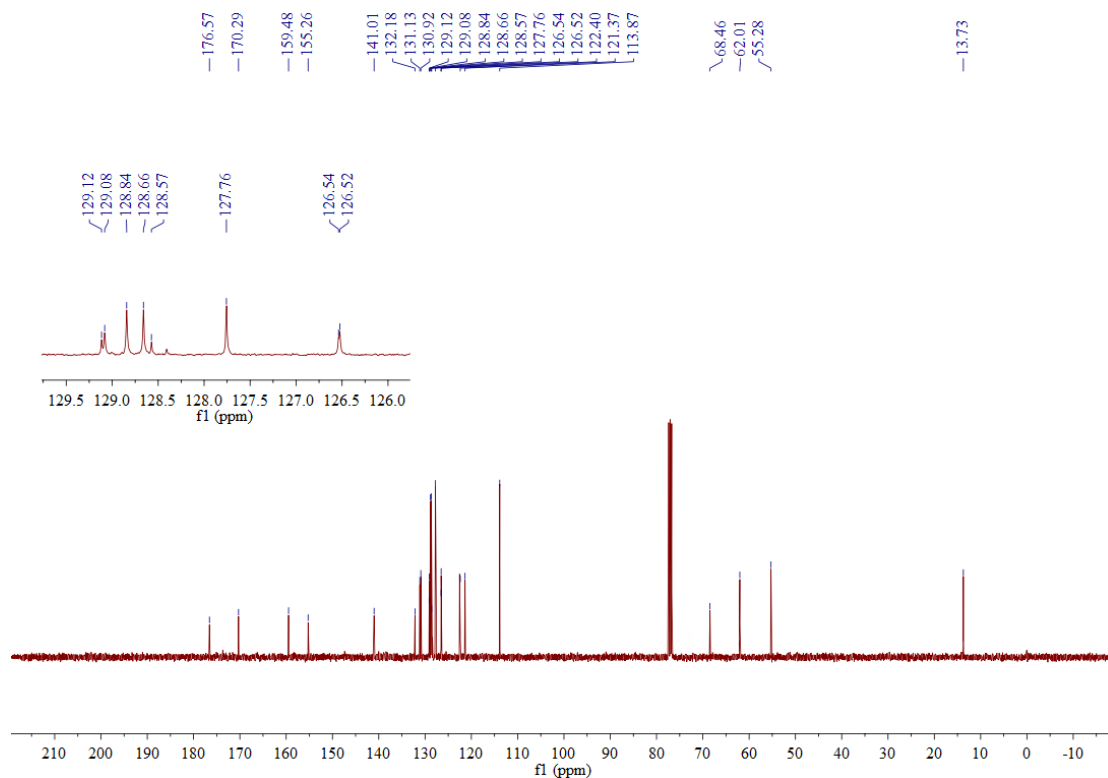

Figure S26  $^{13}\text{C}$  NMR (101 MHz,  $\text{CDCl}_3$ ) spectra of **3ma**

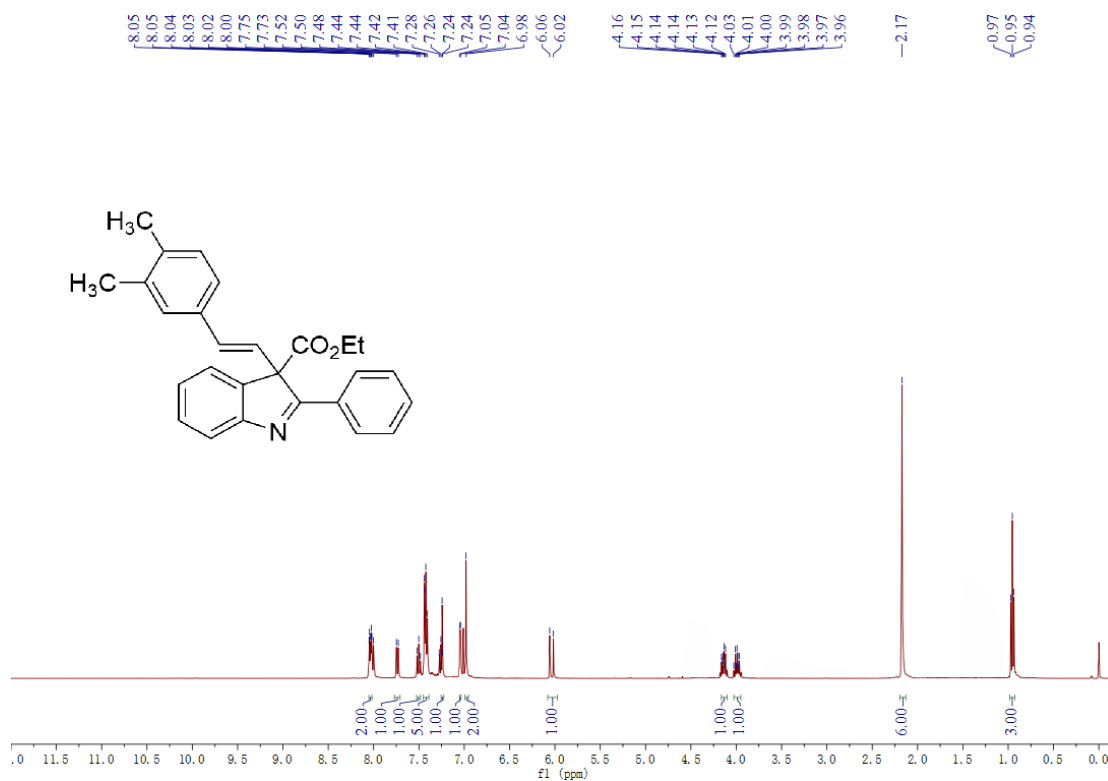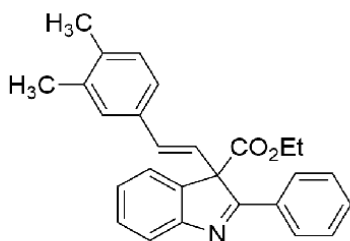

Figure S27  $^1\text{H}$  NMR (400 MHz,  $\text{CDCl}_3$ ) spectra of **3na**

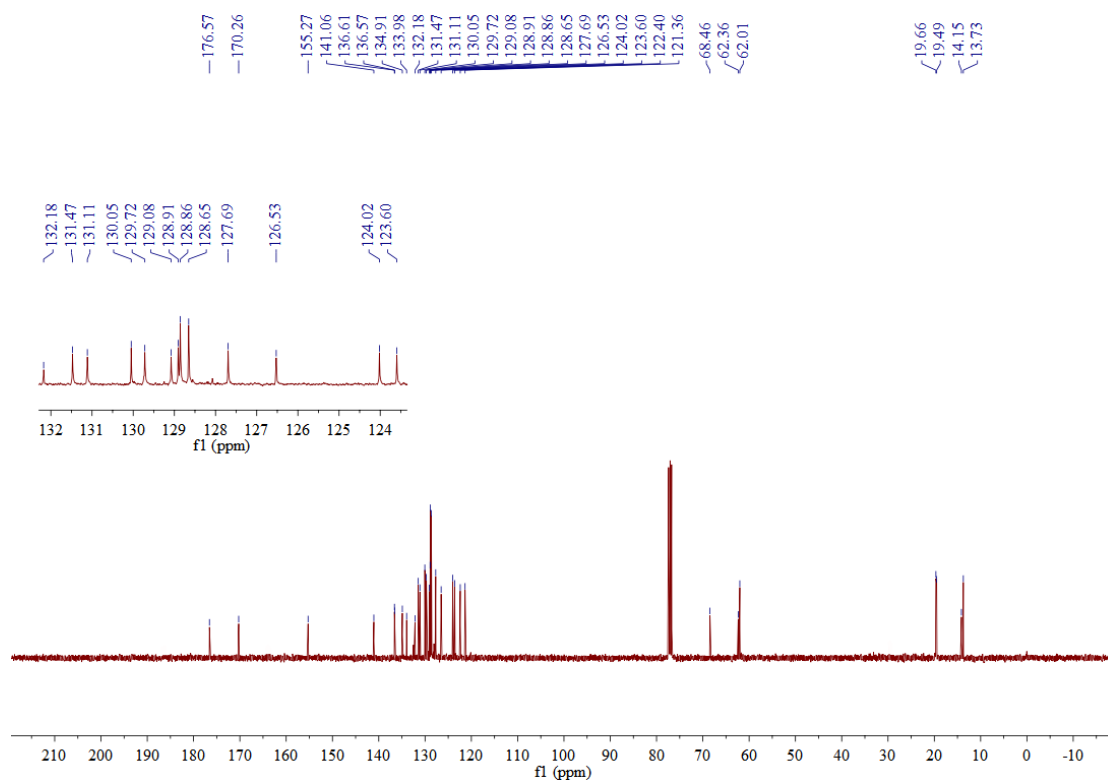

Figure S28 <sup>13</sup>C NMR (101 MHz, CDCl<sub>3</sub>) spectra of **3na**

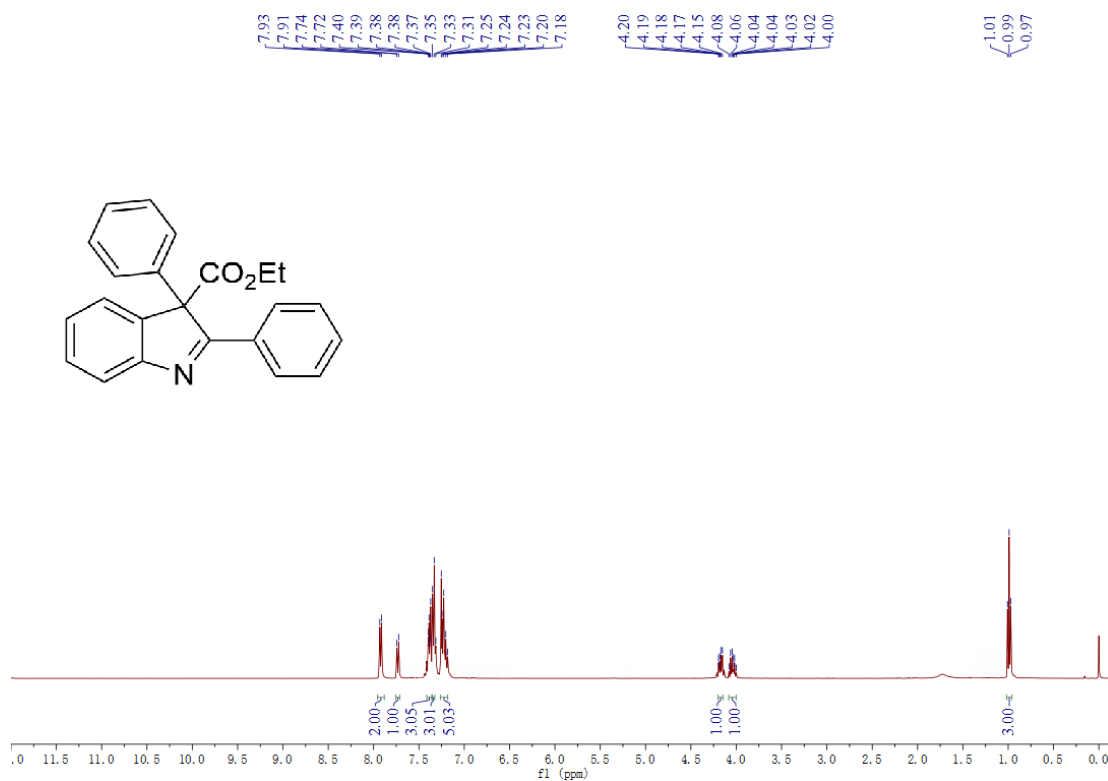

Figure S29 <sup>1</sup>H NMR (400 MHz, CDCl<sub>3</sub>) spectra of **3na**

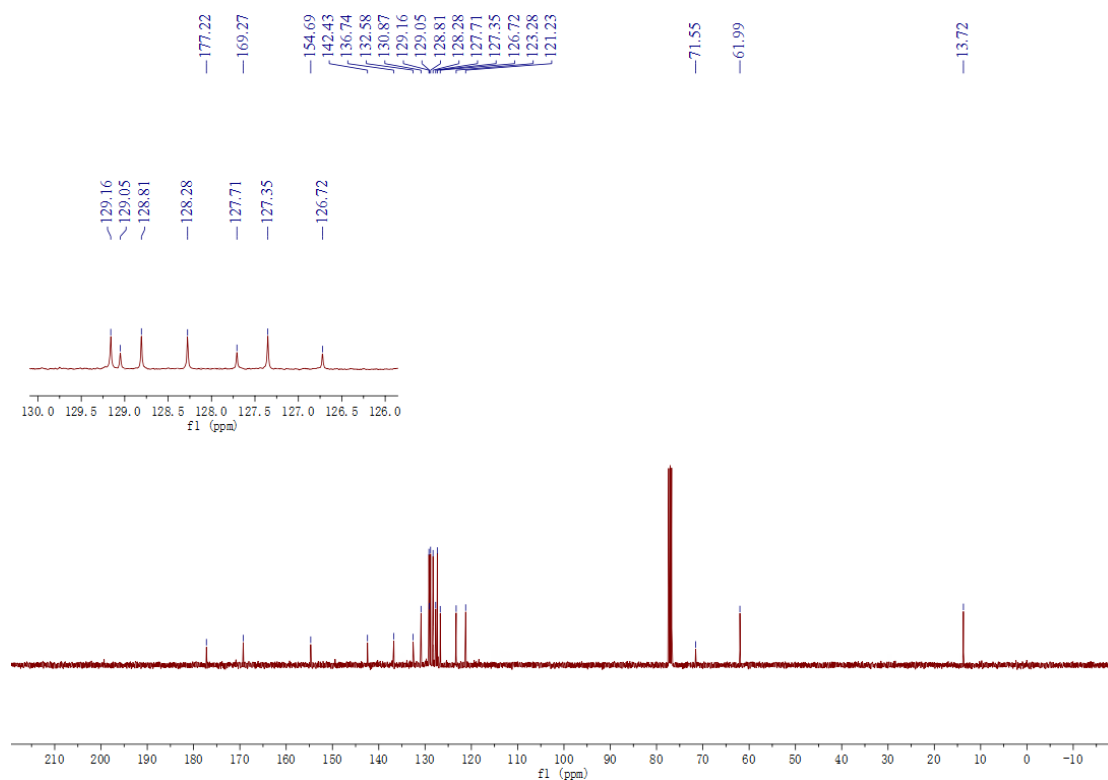

Figure S30 <sup>13</sup>C NMR (101 MHz, CDCl<sub>3</sub>) spectra of **30a**

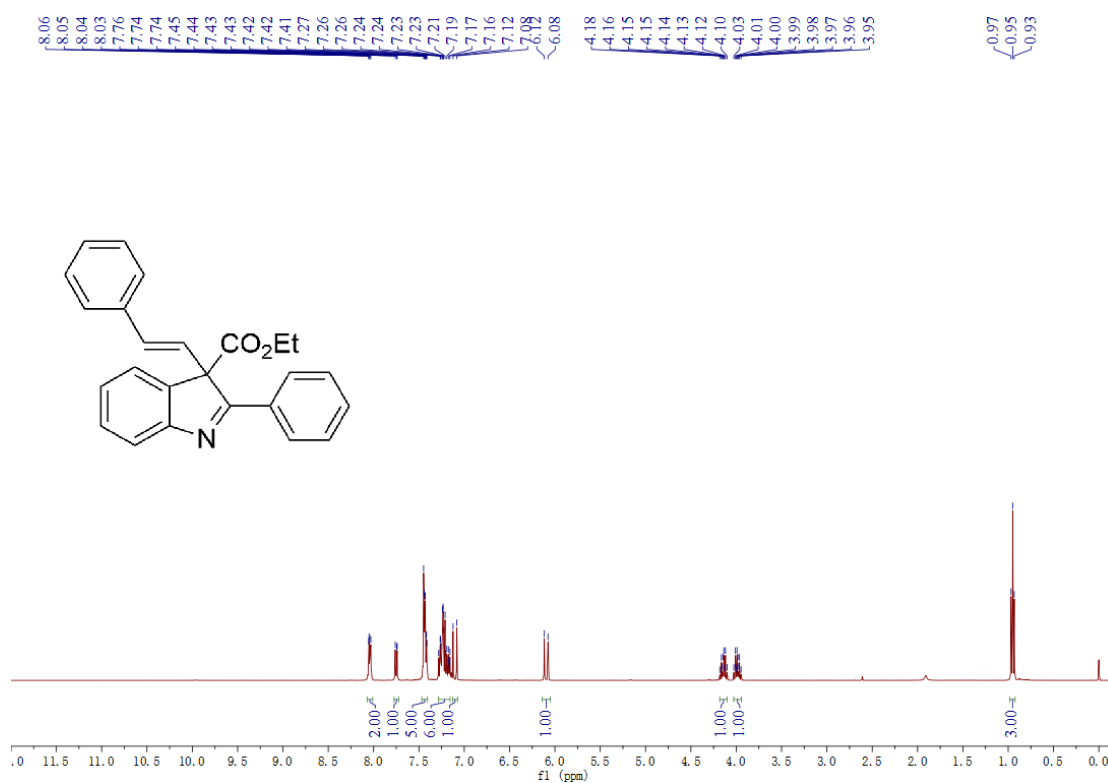

Figure S31 <sup>1</sup>H NMR (400 MHz, CDCl<sub>3</sub>) spectra of **30a**

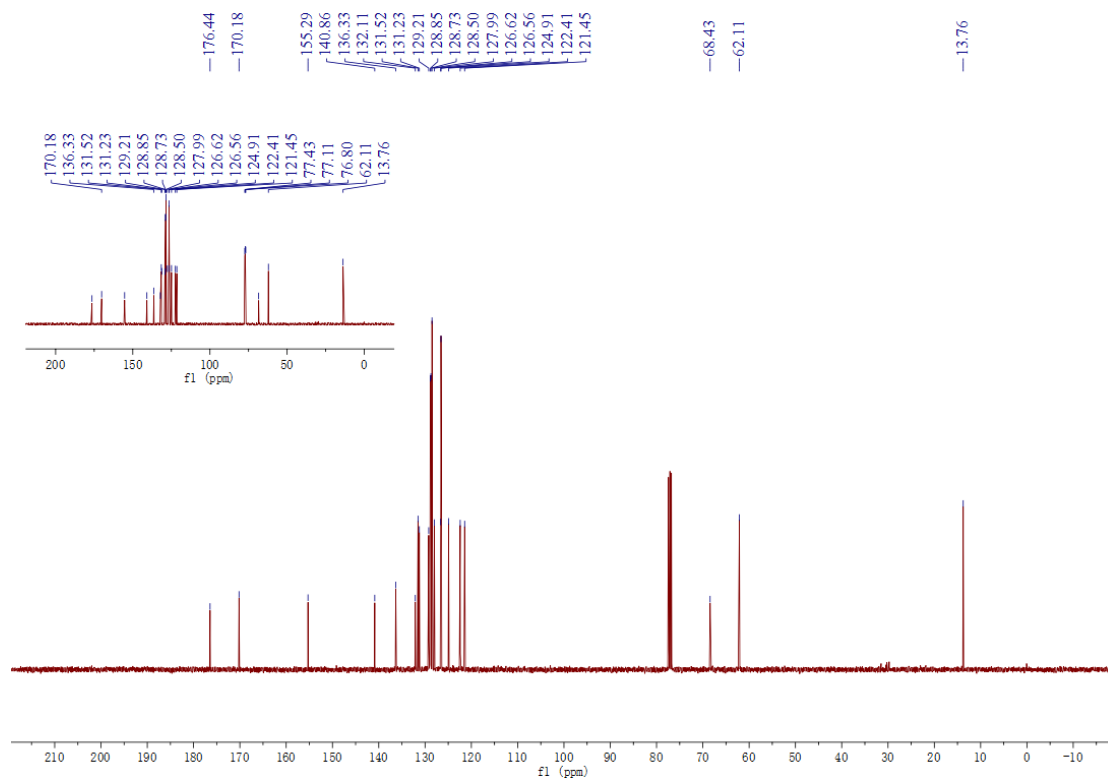

Figure S32 <sup>13</sup>C NMR (101 MHz, CDCl<sub>3</sub>) spectra of **3aa**

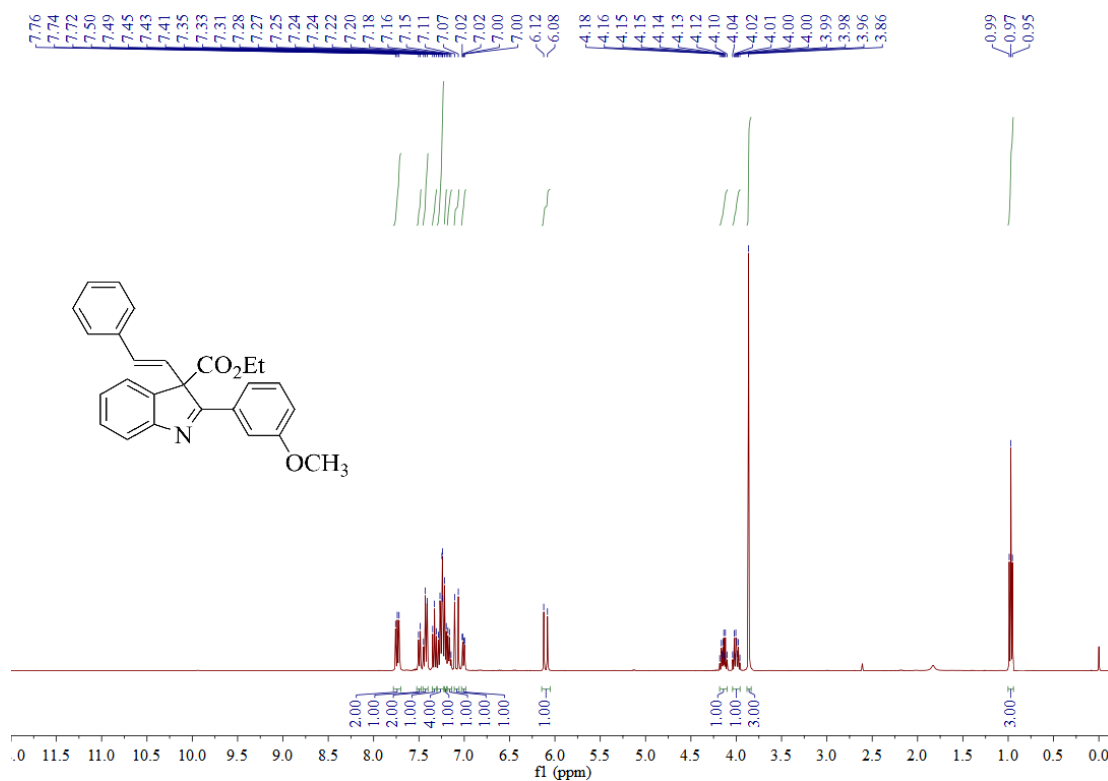

Figure S33 <sup>1</sup>H NMR (400 MHz, CDCl<sub>3</sub>) spectra of **3ab**



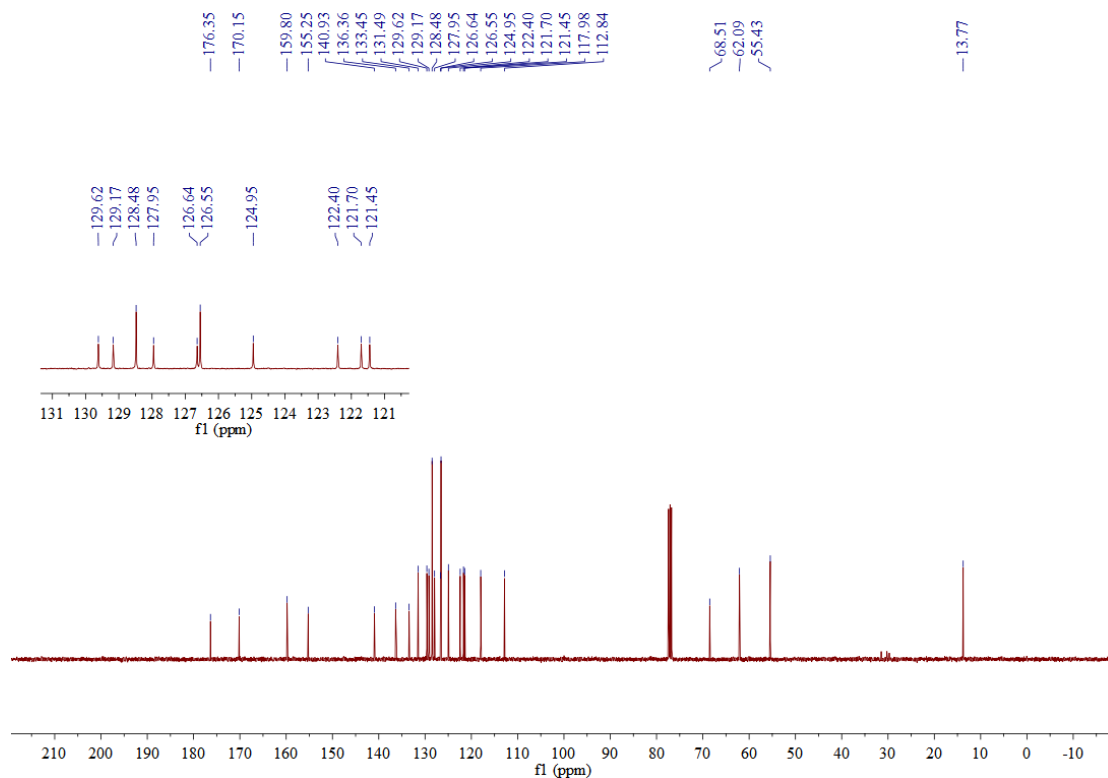

Figure S34  $^{13}\text{C}$  NMR (101 MHz,  $\text{CDCl}_3$ ) spectra of **3ab**

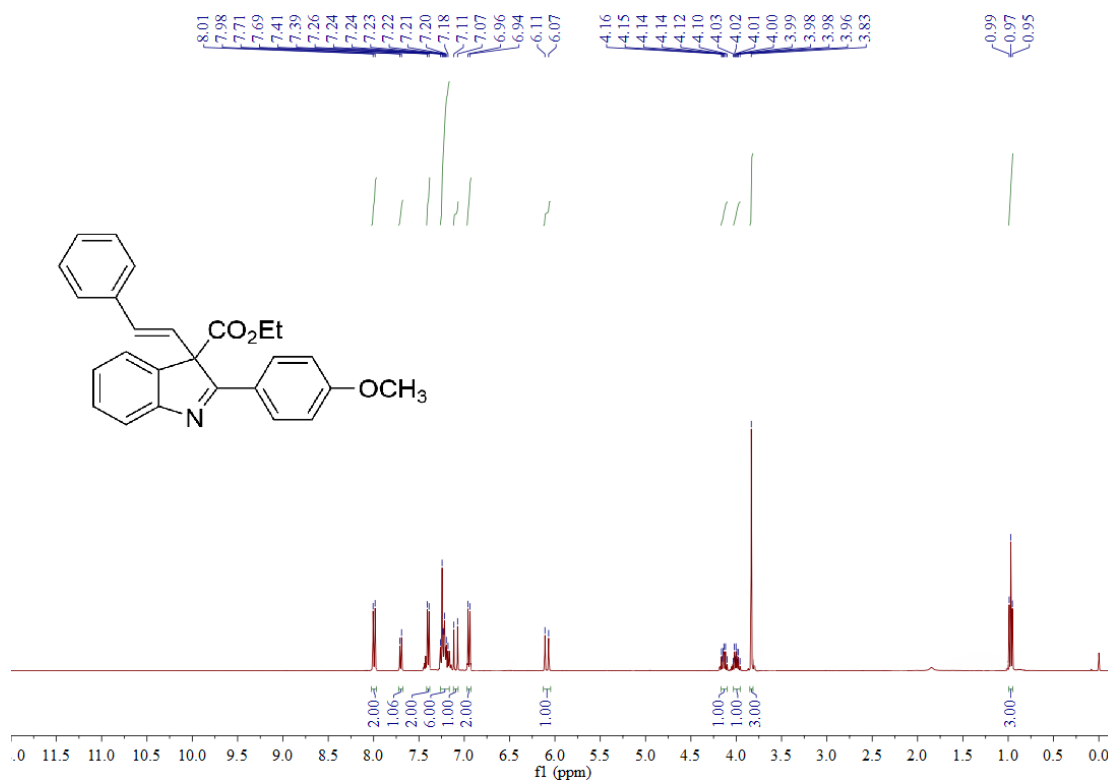

Figure S35  $^1\text{H}$  NMR (400 MHz,  $\text{CDCl}_3$ ) spectra of **3ac**

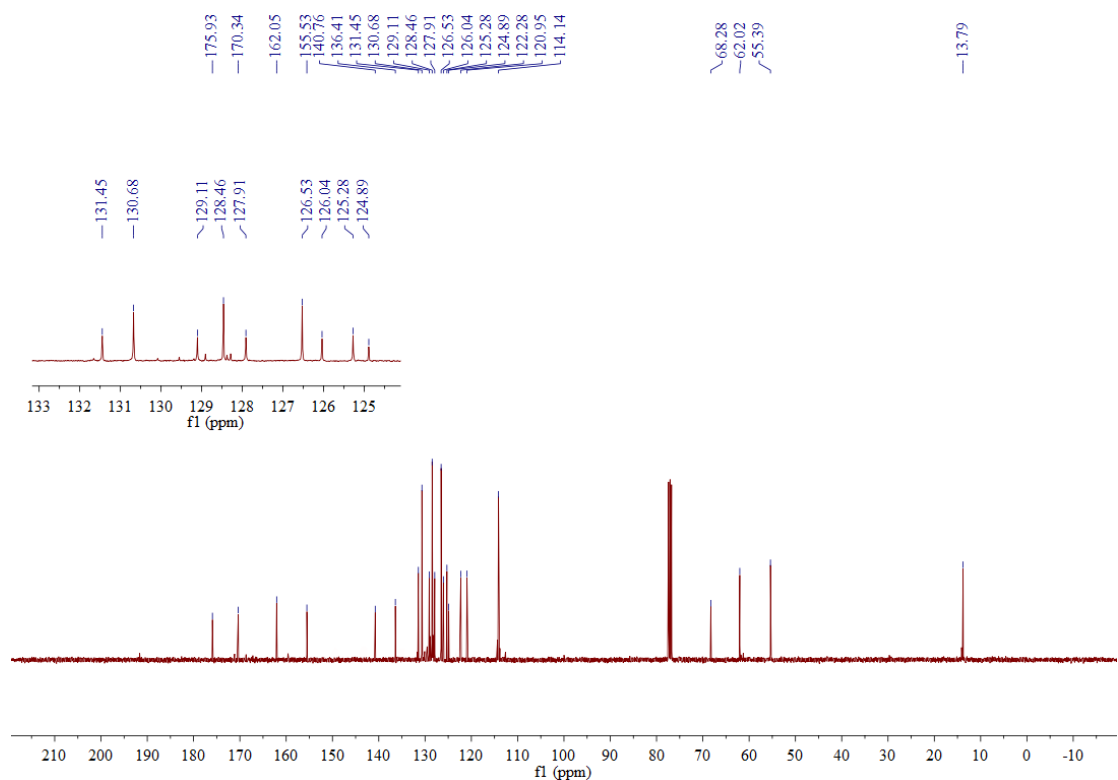

Figure S36  $^{13}\text{C}$  NMR (101 MHz,  $\text{CDCl}_3$ ) spectra of **3ac**

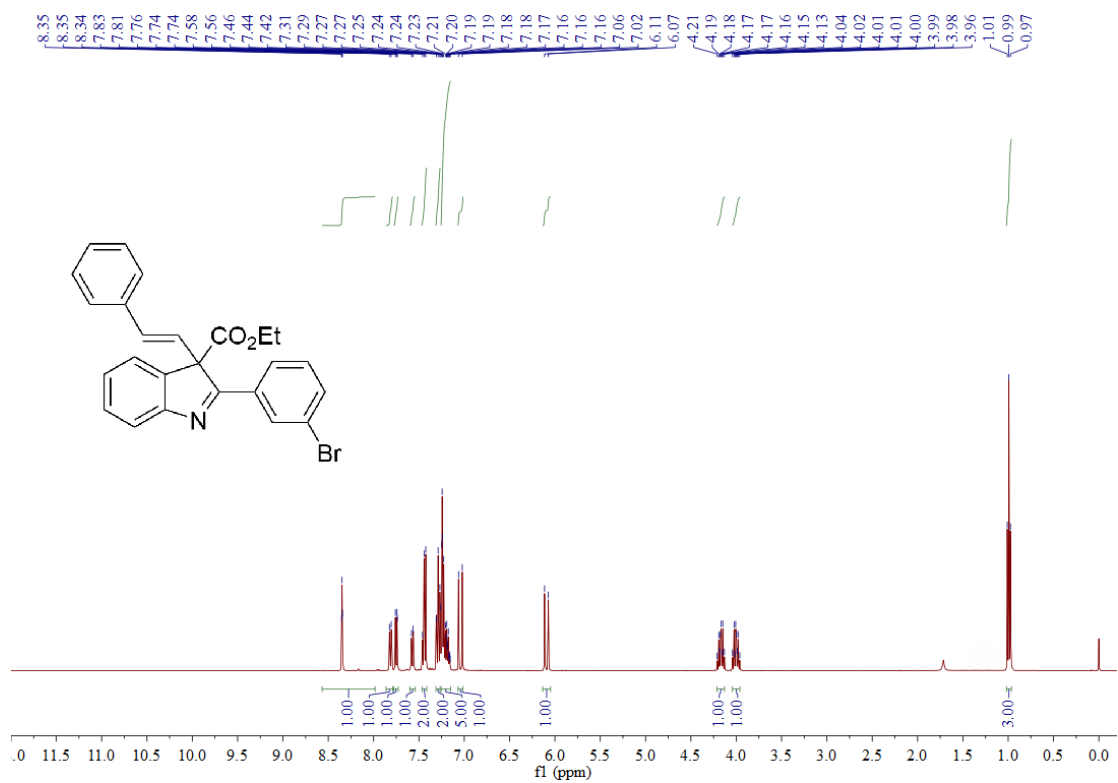

Figure S37  $^1\text{H}$  NMR (400 MHz,  $\text{CDCl}_3$ ) spectra of **3ad**

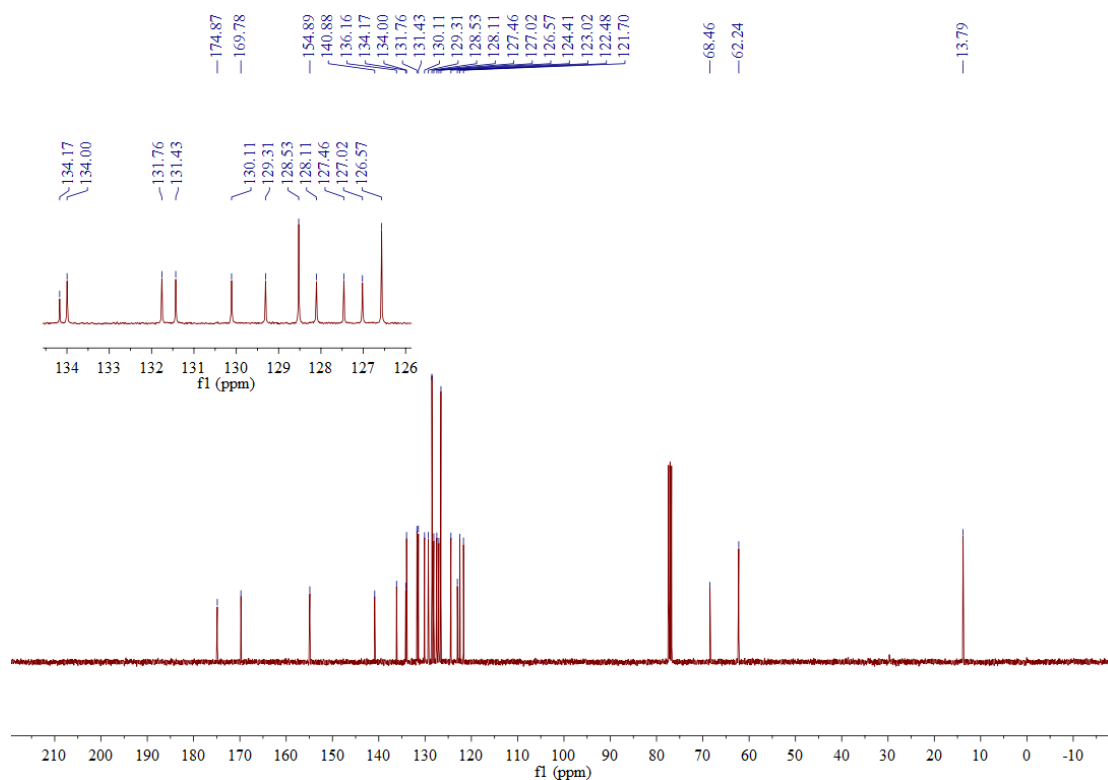

Figure S38 <sup>13</sup>C NMR (101 MHz, CDCl<sub>3</sub>) spectra of **3ad**

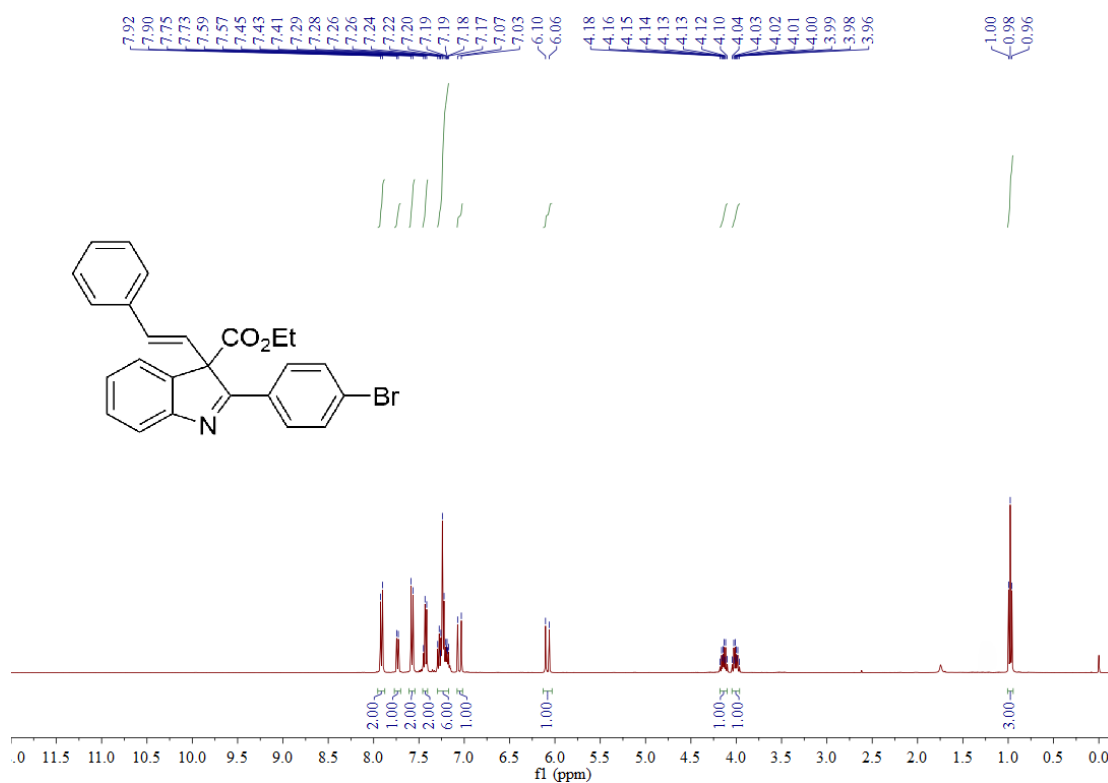

Figure S39 <sup>1</sup>H NMR (400 MHz, CDCl<sub>3</sub>) spectra of **3ae**

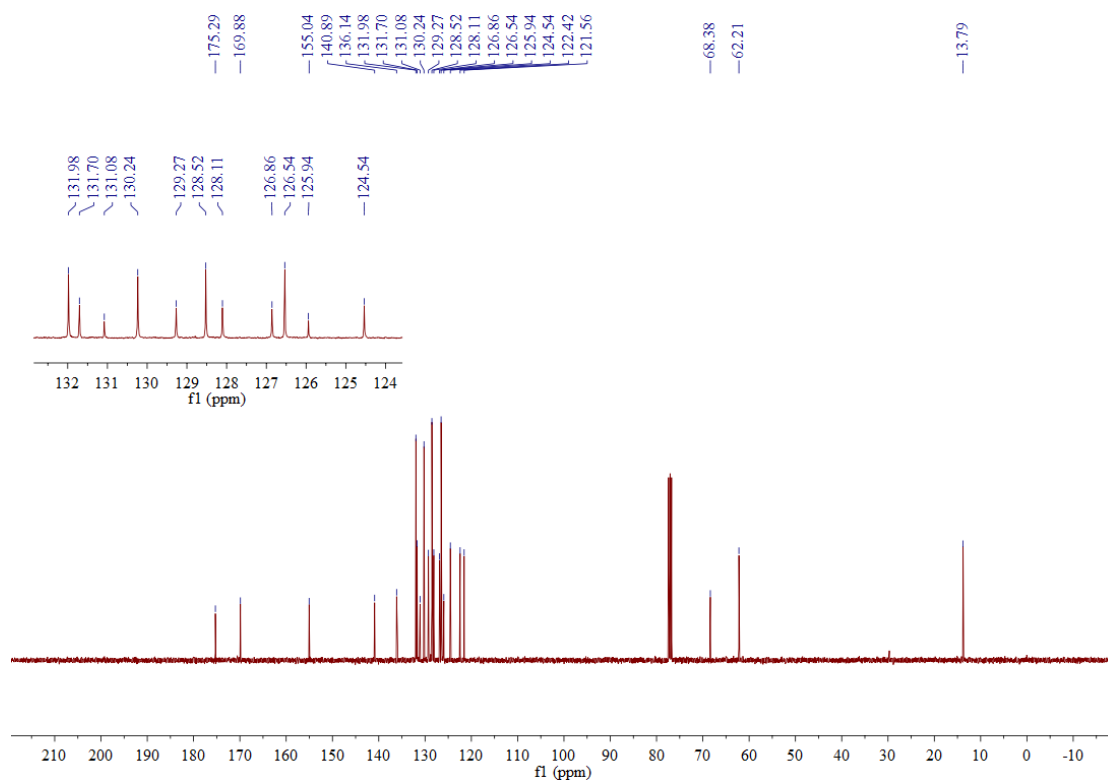

Figure S40 <sup>13</sup>C NMR (101 MHz, CDCl<sub>3</sub>) spectra of **3ae**

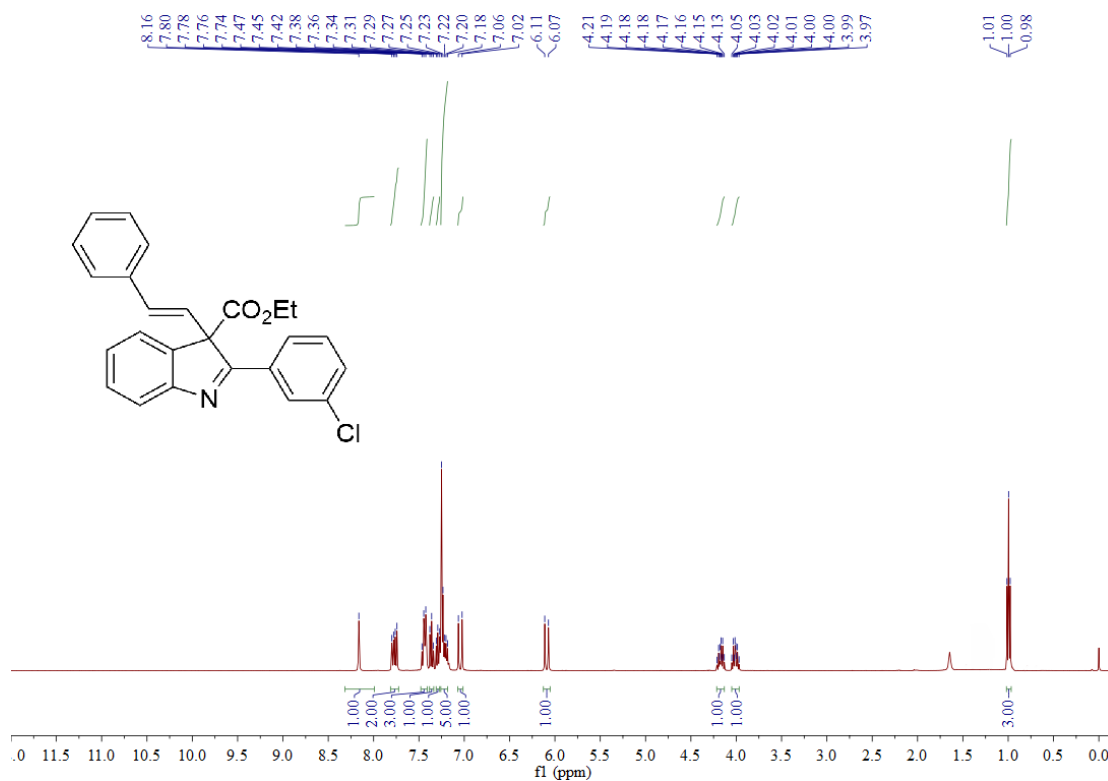

Figure S41 <sup>1</sup>H NMR (400 MHz, CDCl<sub>3</sub>) spectra of **3af**

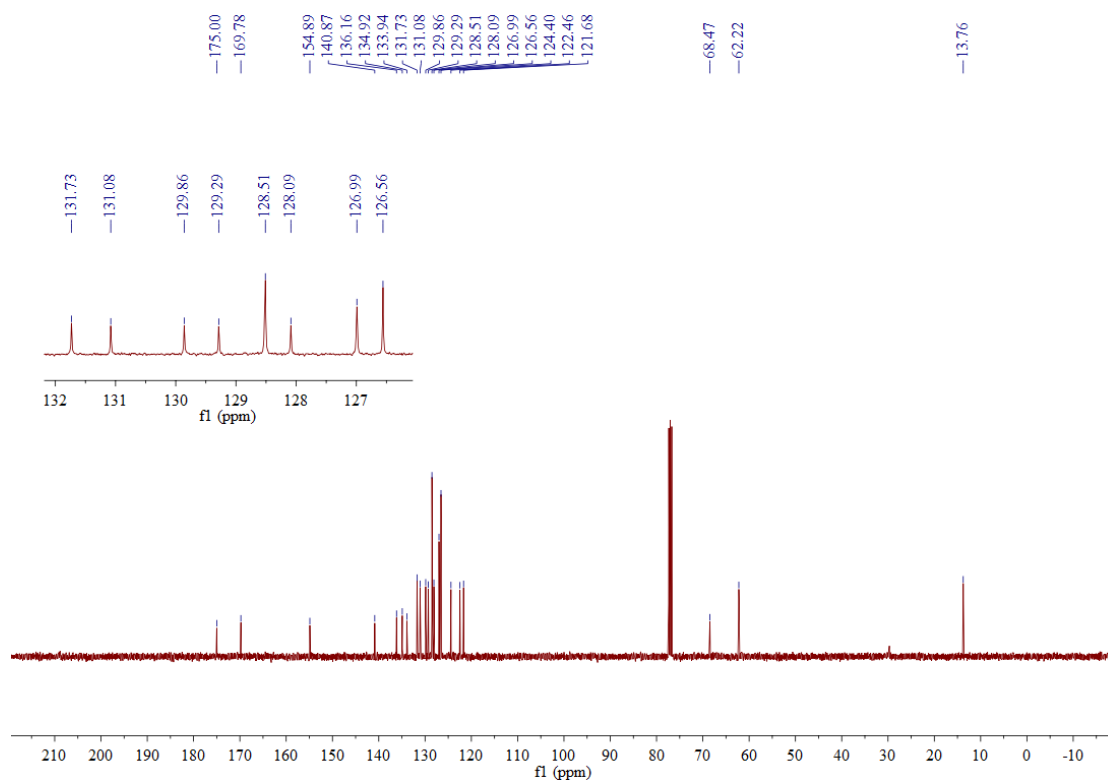

Figure S42  $^{13}\text{C}$  NMR (101 MHz,  $\text{CDCl}_3$ ) spectra of **3af**

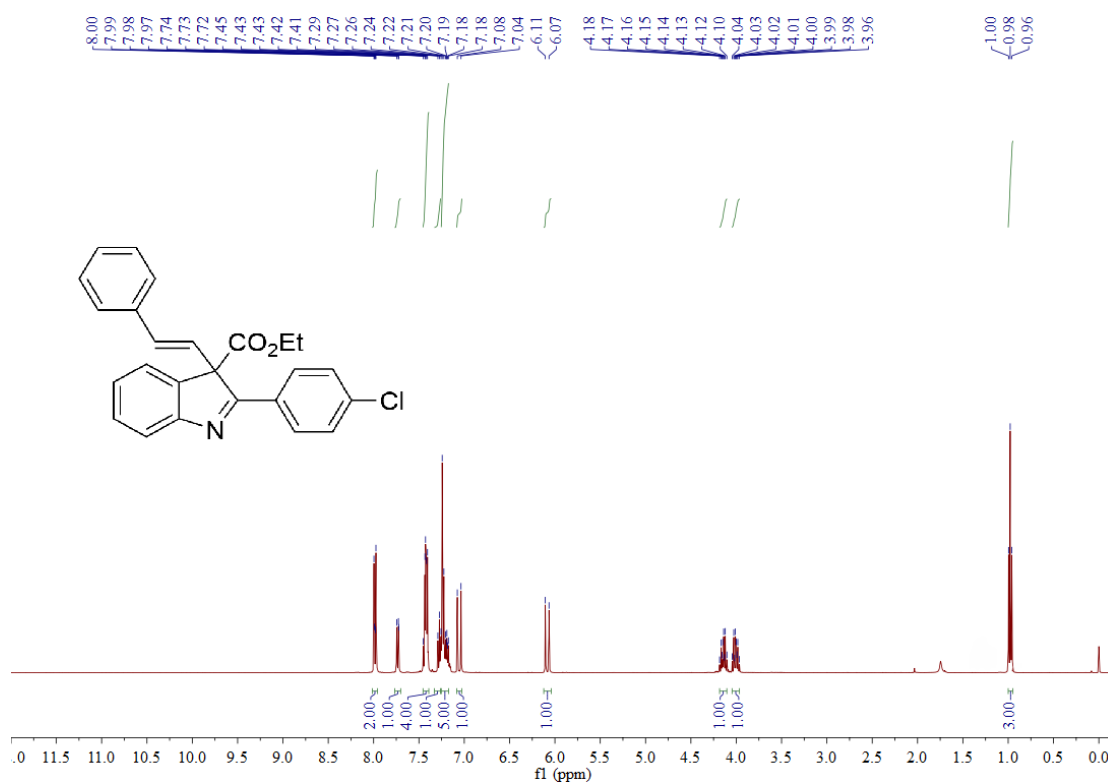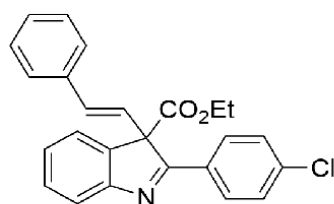

Figure S43  $^1\text{H}$  NMR (400 MHz,  $\text{CDCl}_3$ ) spectra of **3ag**

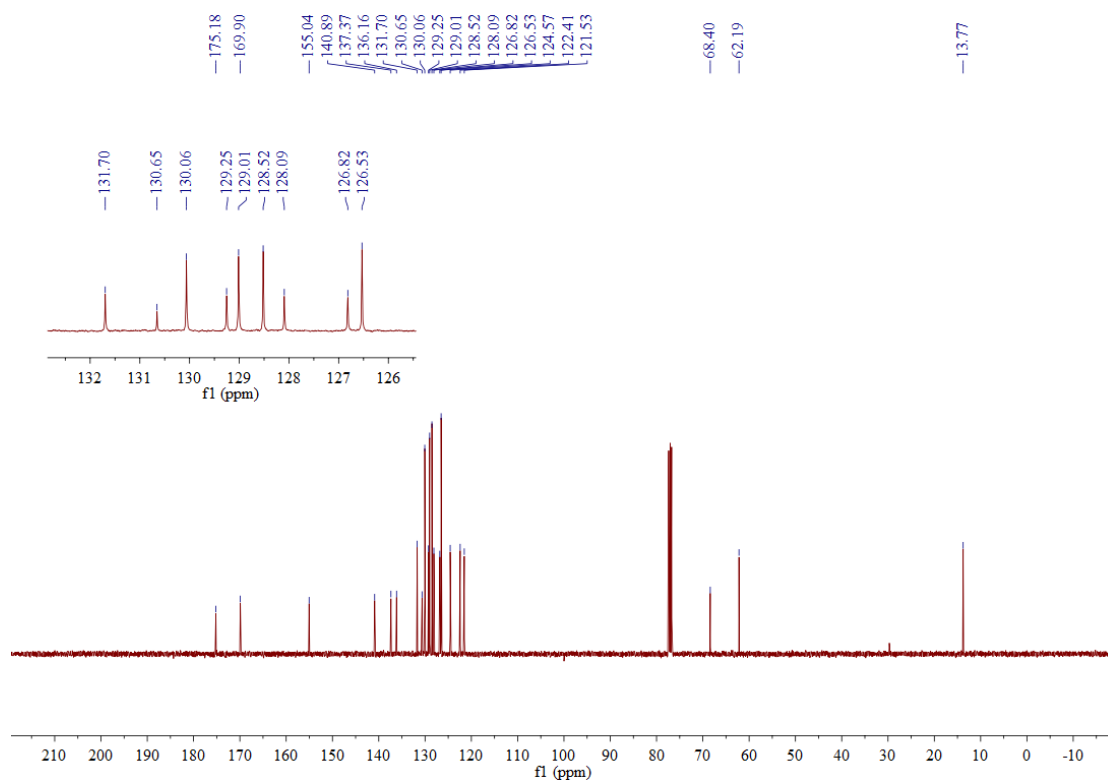

Figure S44  $^{13}\text{C}$  NMR (101 MHz,  $\text{CDCl}_3$ ) spectra of **3ag**

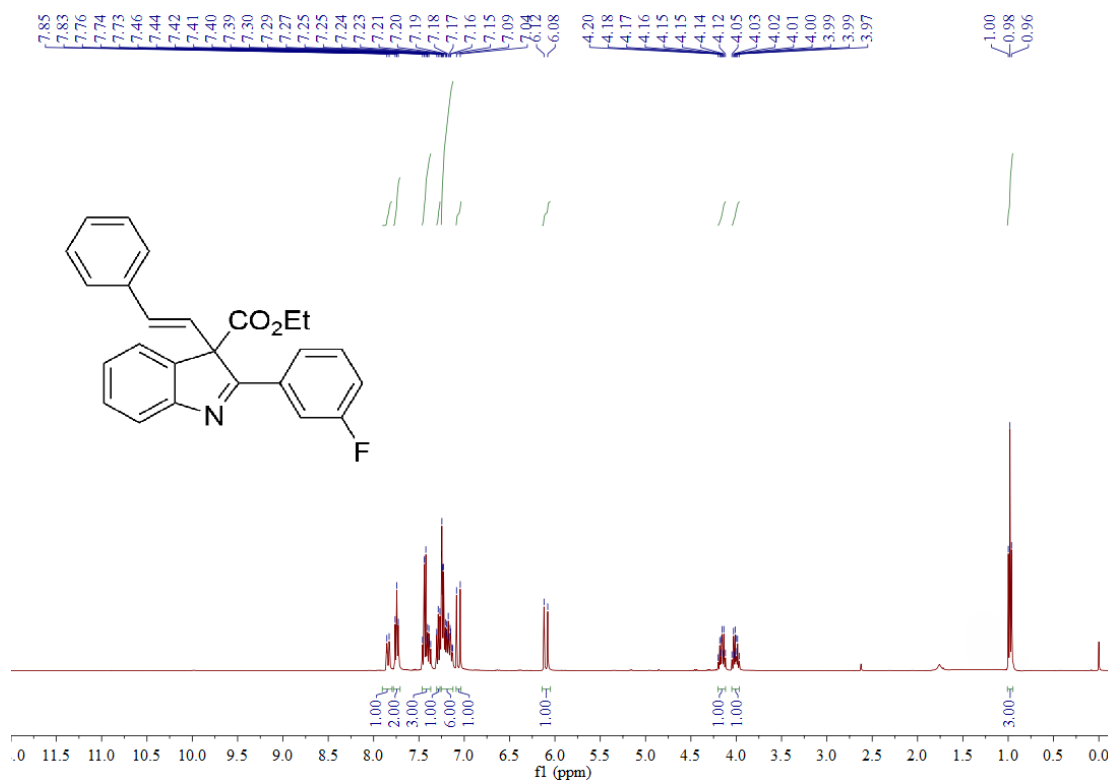

Figure S45  $^1\text{H}$  NMR (400 MHz,  $\text{CDCl}_3$ ) spectra of **3ah**

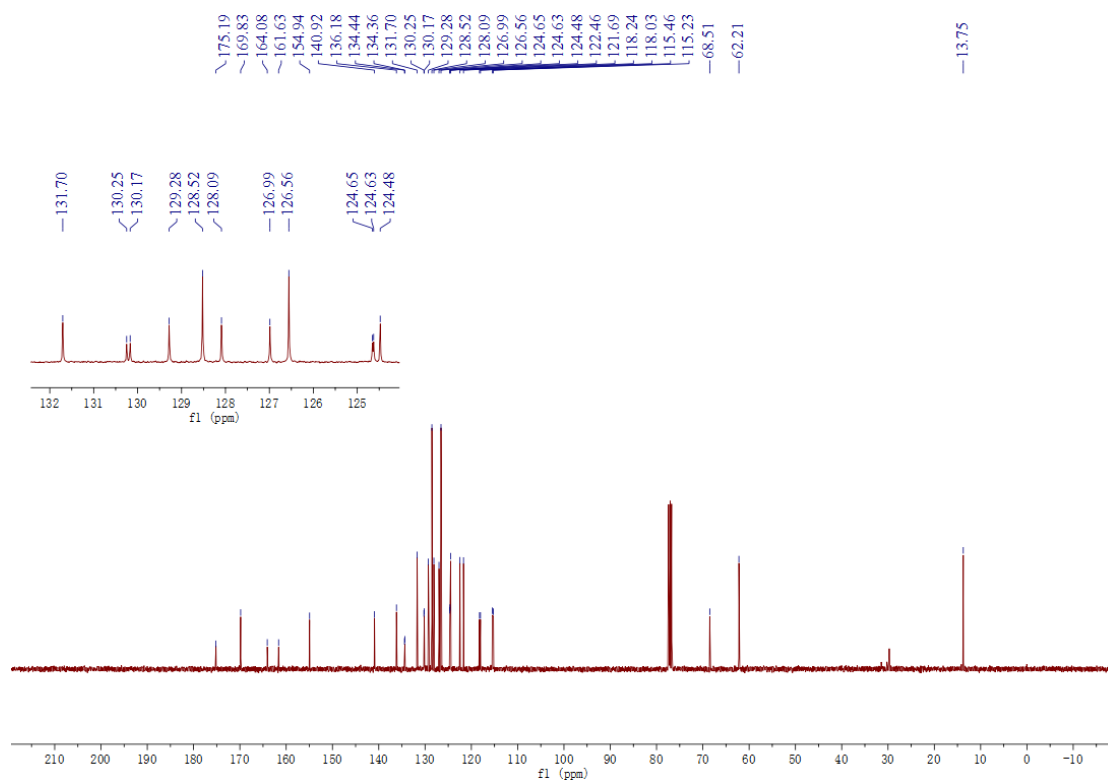

Figure S46  $^{13}\text{C}$  NMR (101 MHz,  $\text{CDCl}_3$ ) spectra of **3ah**

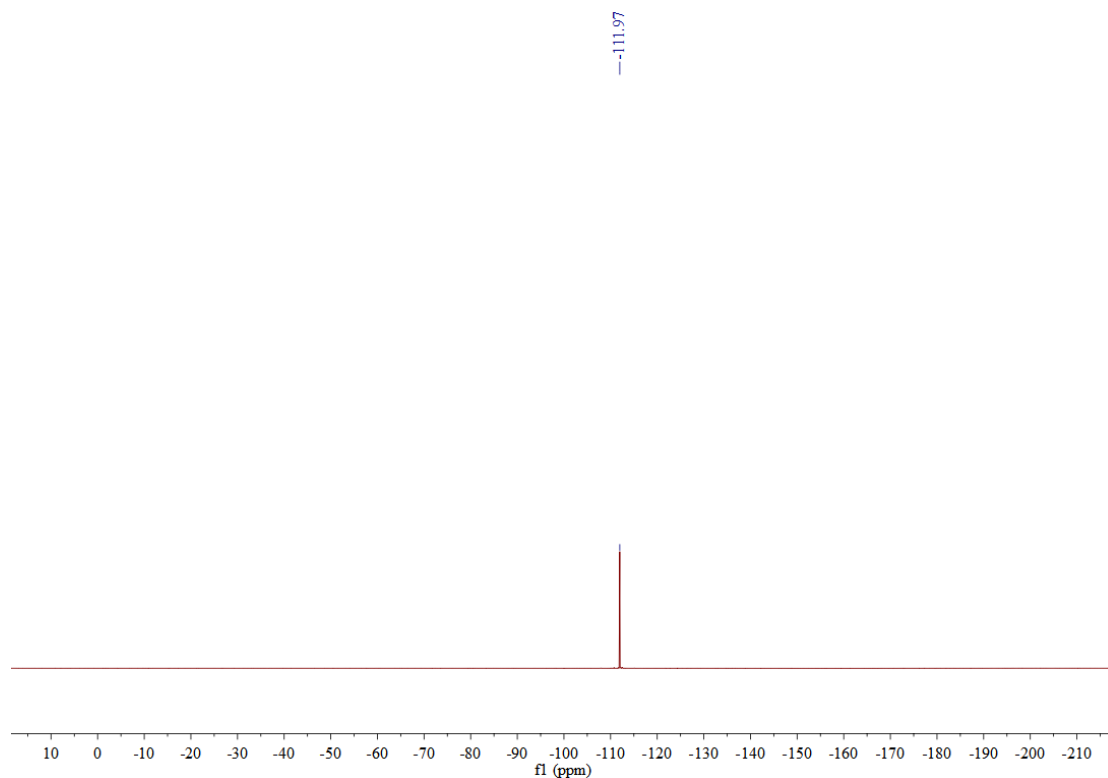

Figure S47  $^{19}\text{F}$  NMR (376 MHz,  $\text{CDCl}_3$ ) spectra of **3ah**

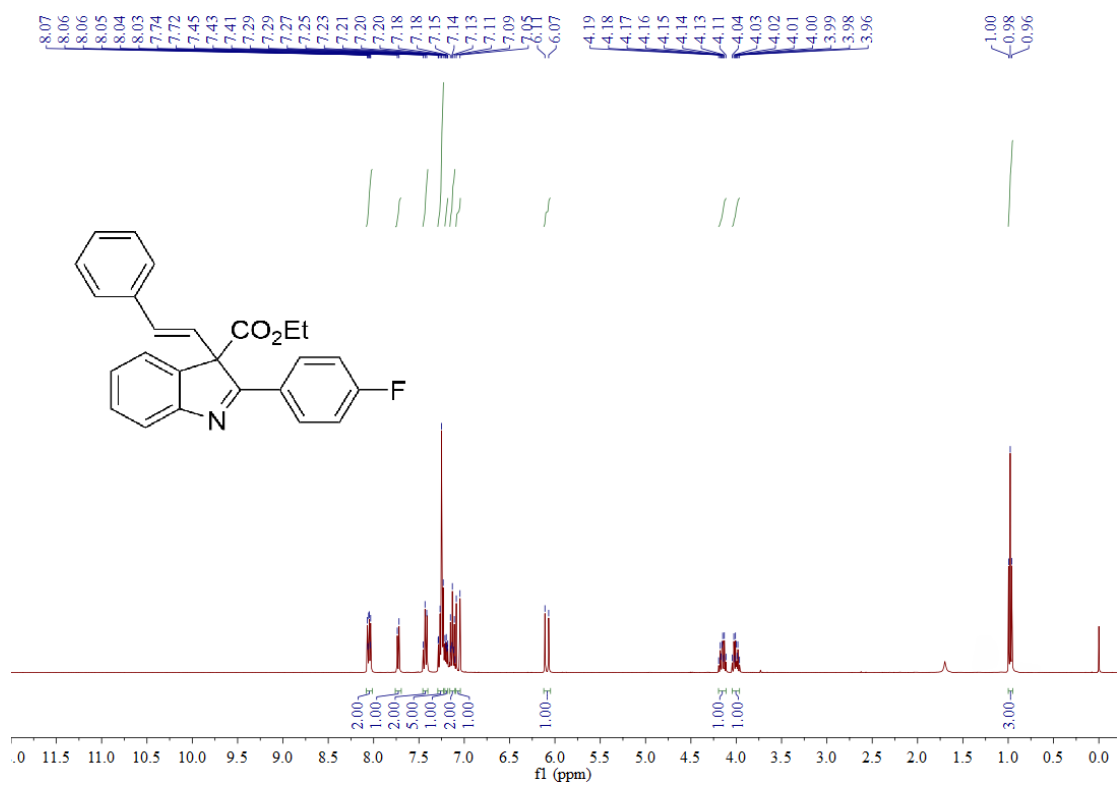

Figure S48 <sup>1</sup>H NMR (400 MHz, CDCl<sub>3</sub>) spectra of **3ai**



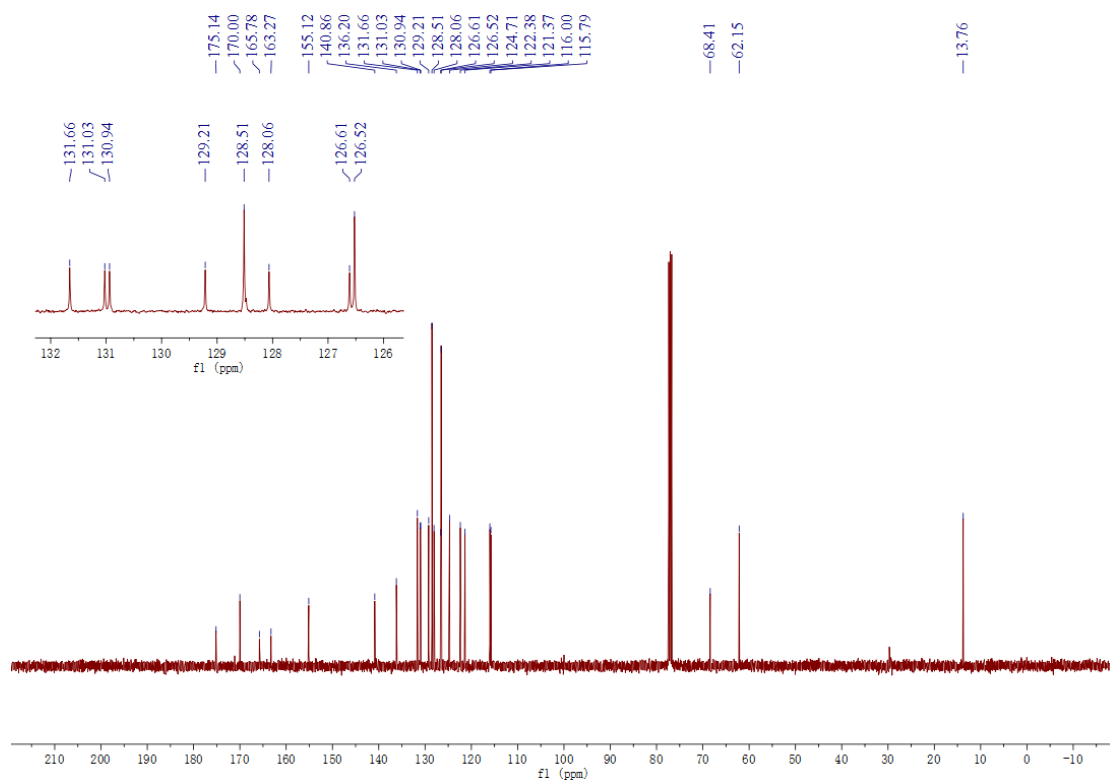

Figure S49  $^{13}\text{C}$  NMR (101 MHz,  $\text{CDCl}_3$ ) spectra of **3ai**

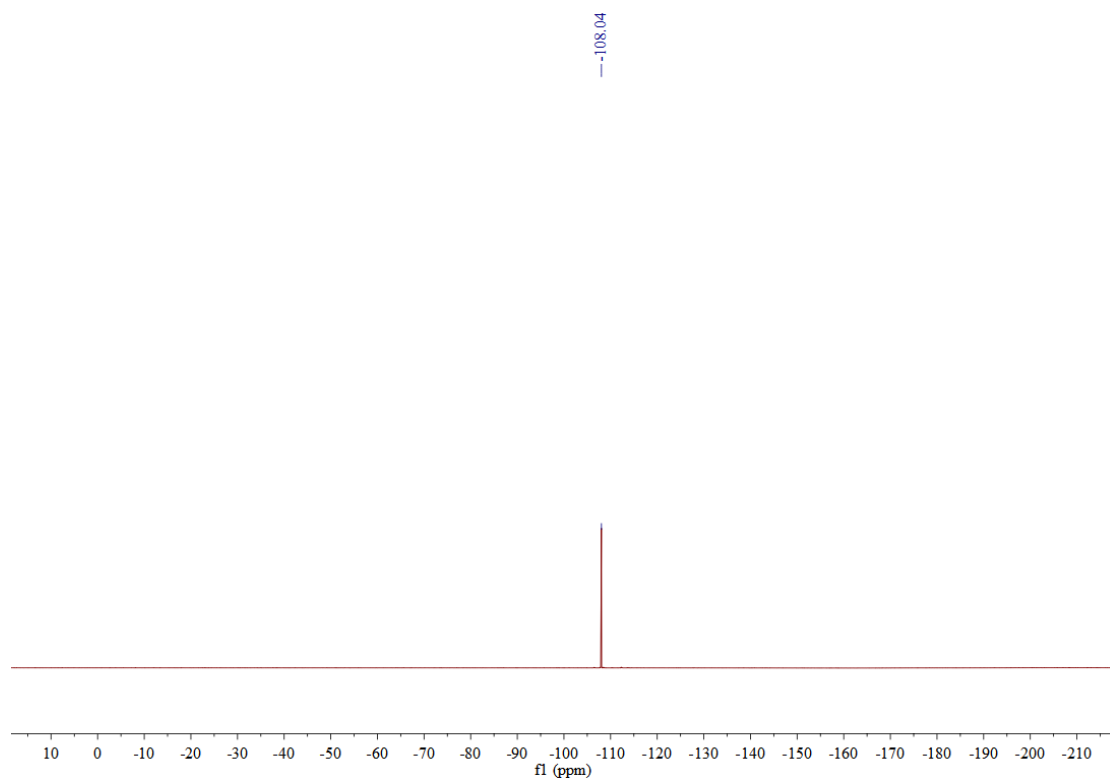

Figure S50  $^{19}\text{F}$  NMR (376 MHz,  $\text{CDCl}_3$ ) spectra of **3ai**

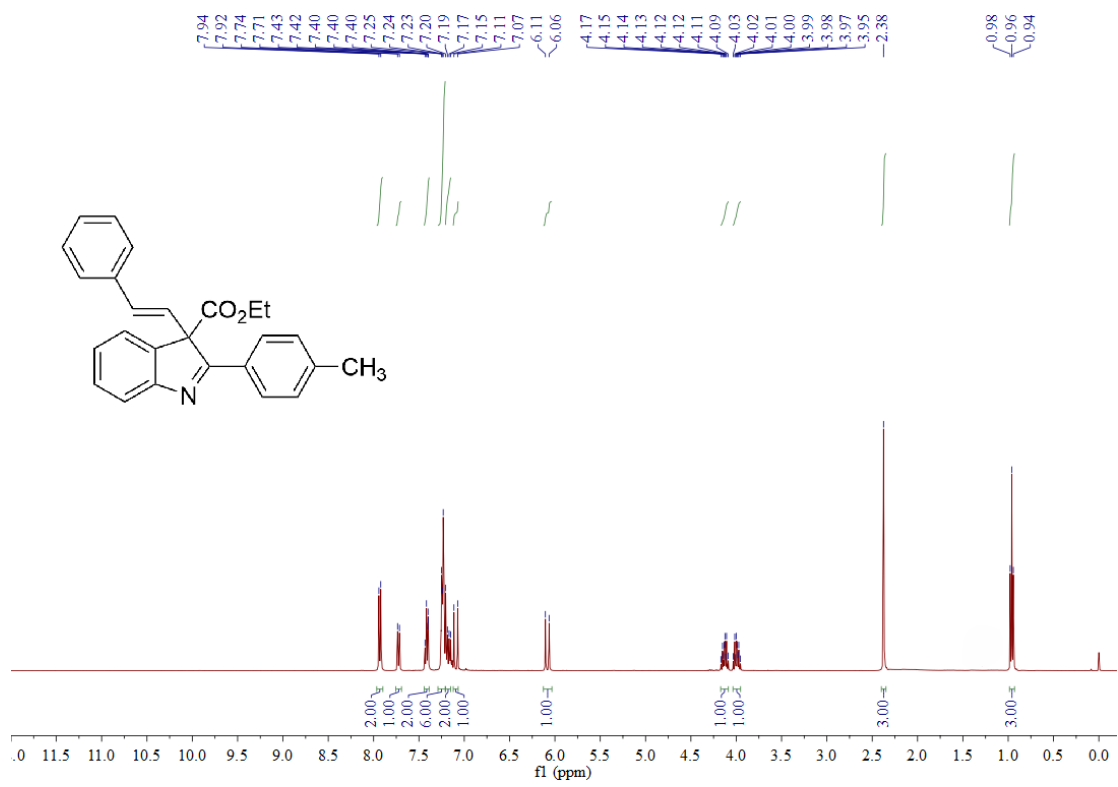

Figure S51 <sup>1</sup>H NMR (400 MHz, CDCl<sub>3</sub>) spectra of **3aj**

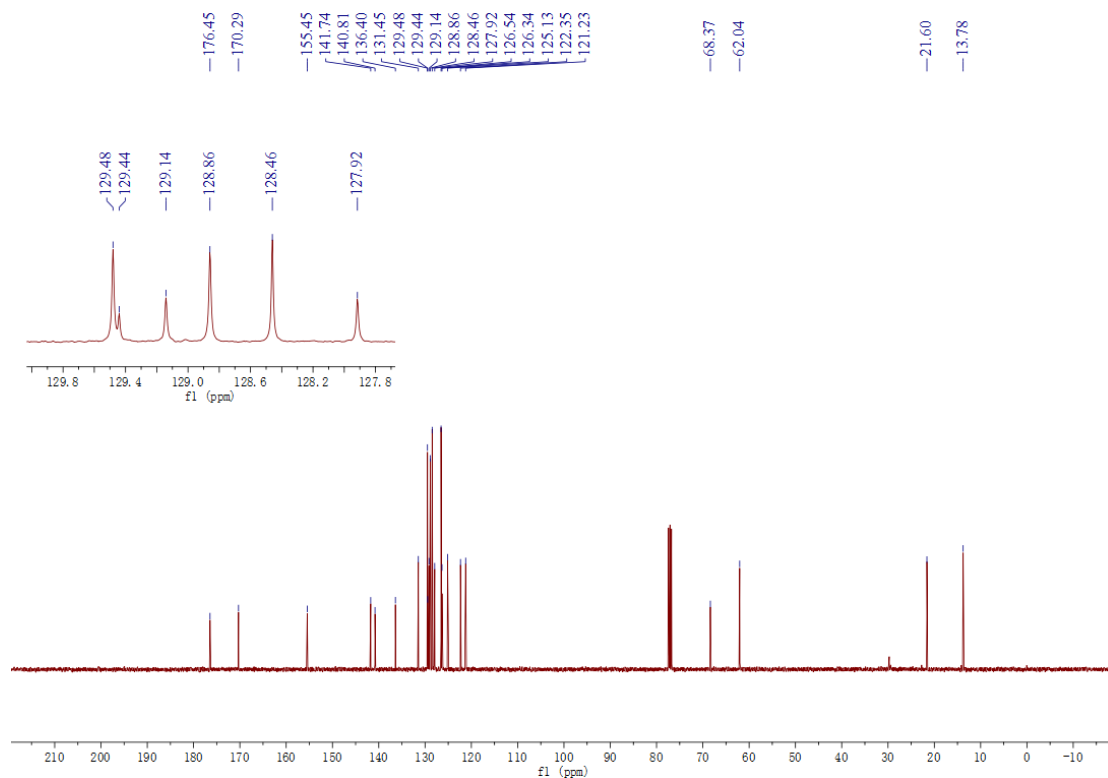

Figure S52  $^{13}\text{C}$  NMR (101 MHz,  $\text{CDCl}_3$ ) spectra of **3aj**

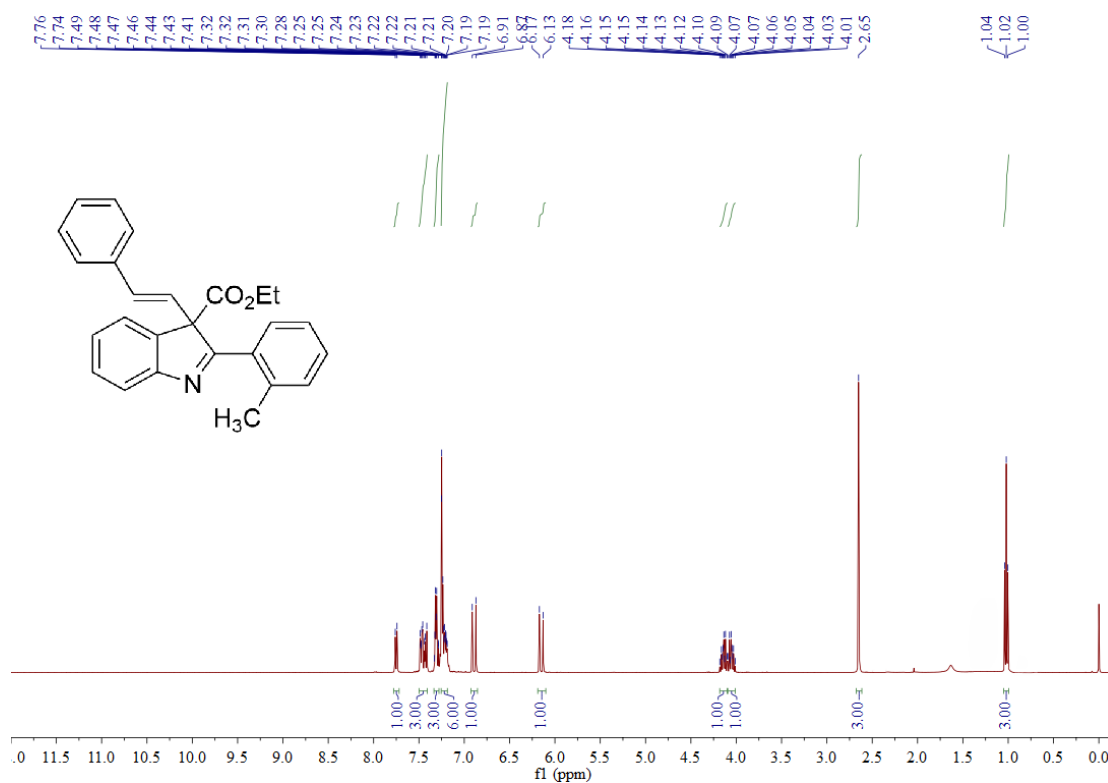

Figure S53  $^1\text{H}$  NMR (400 MHz,  $\text{CDCl}_3$ ) spectra of **3ak**

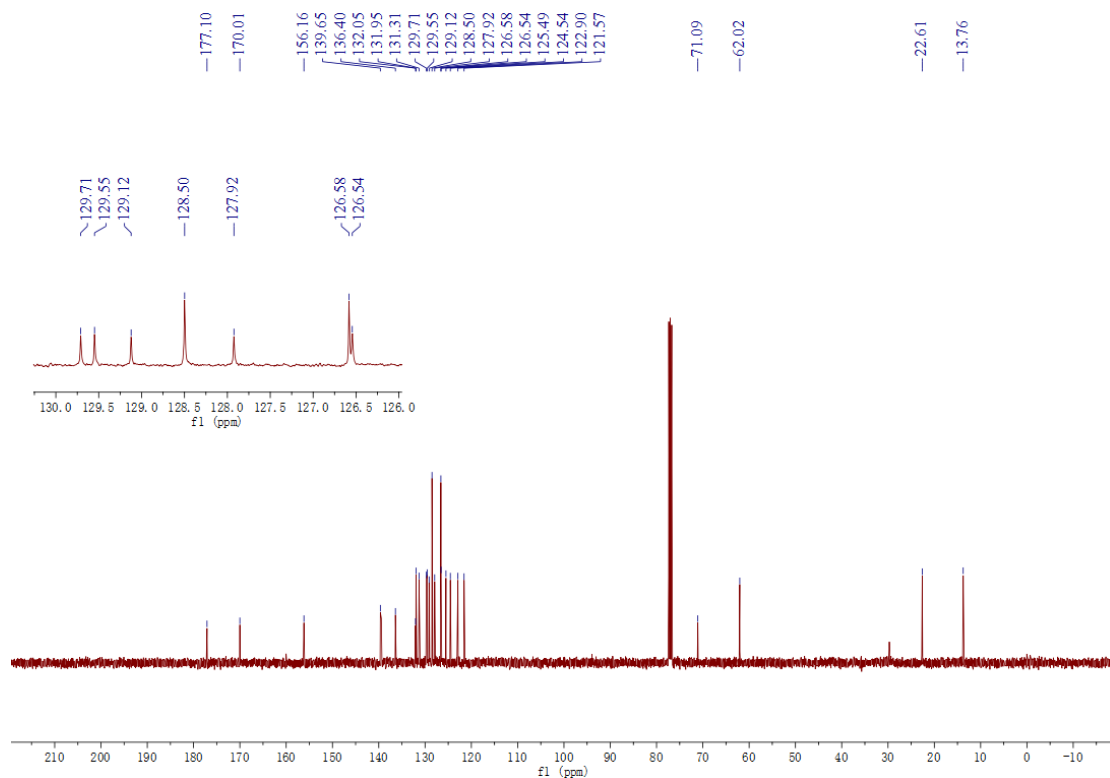

Figure S54 <sup>13</sup>C NMR (101 MHz, CDCl<sub>3</sub>) spectra of **3ak**

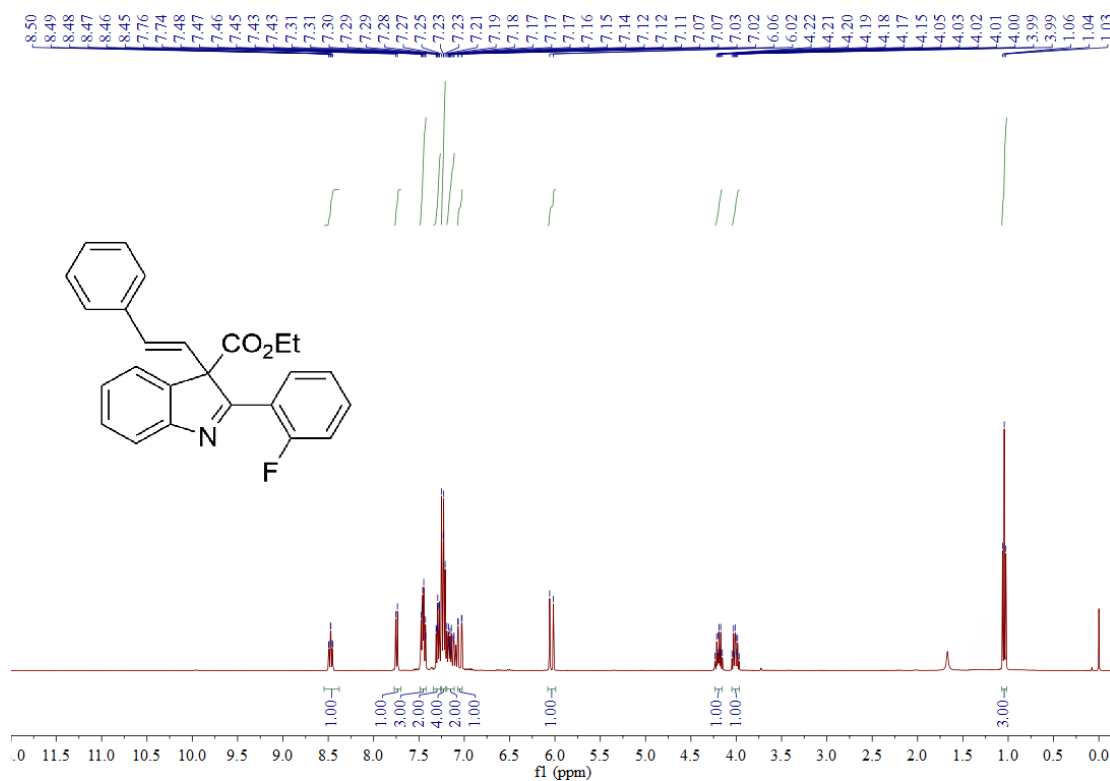

Figure S55 <sup>1</sup>H NMR (400 MHz, CDCl<sub>3</sub>) spectra of **3ao**

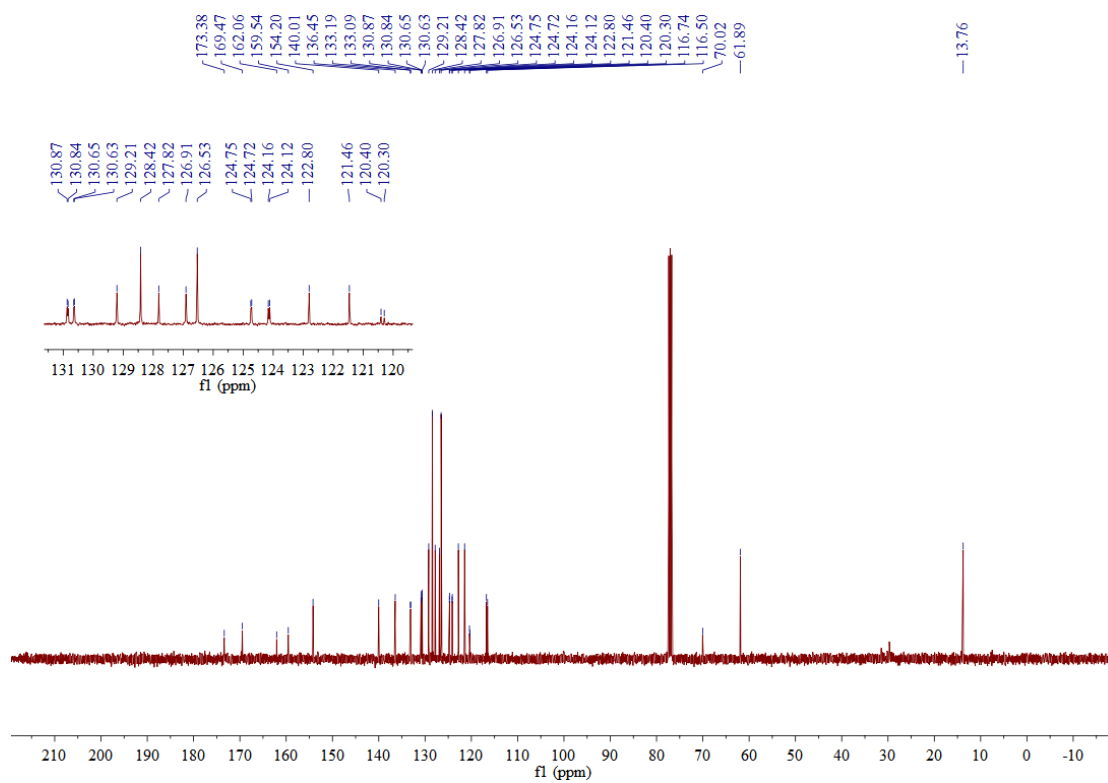

Figure S56  $^{13}\text{C}$  NMR (101 MHz,  $\text{CDCl}_3$ ) spectra of **3ao**

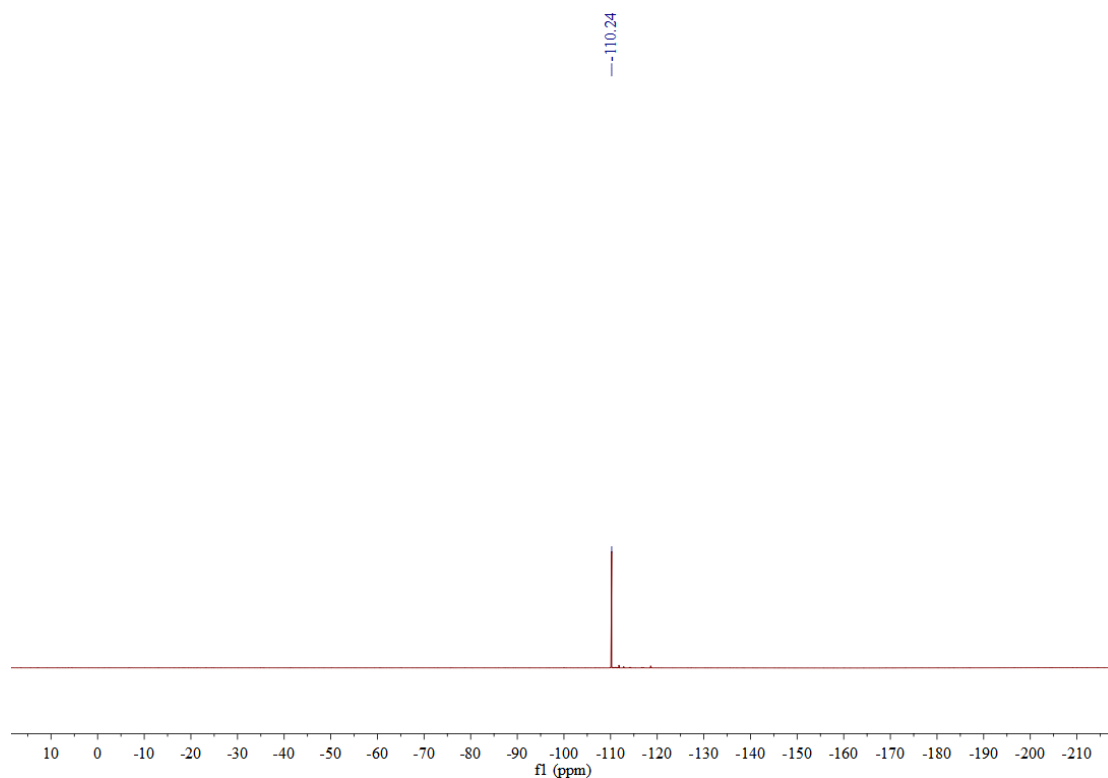

Figure S57  $^{19}\text{F}$  NMR (376 MHz,  $\text{CDCl}_3$ ) spectra of **3ao**

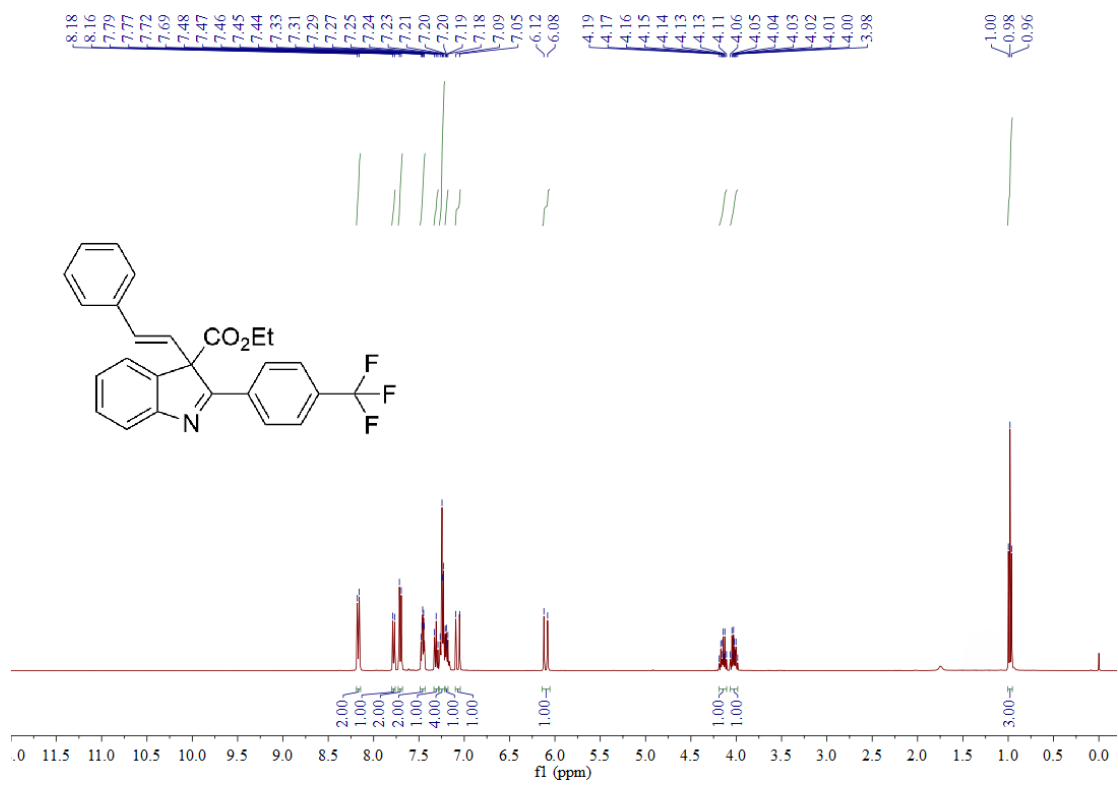

Figure S58 <sup>1</sup>H NMR (400 MHz, CDCl<sub>3</sub>) spectra of **3ap**

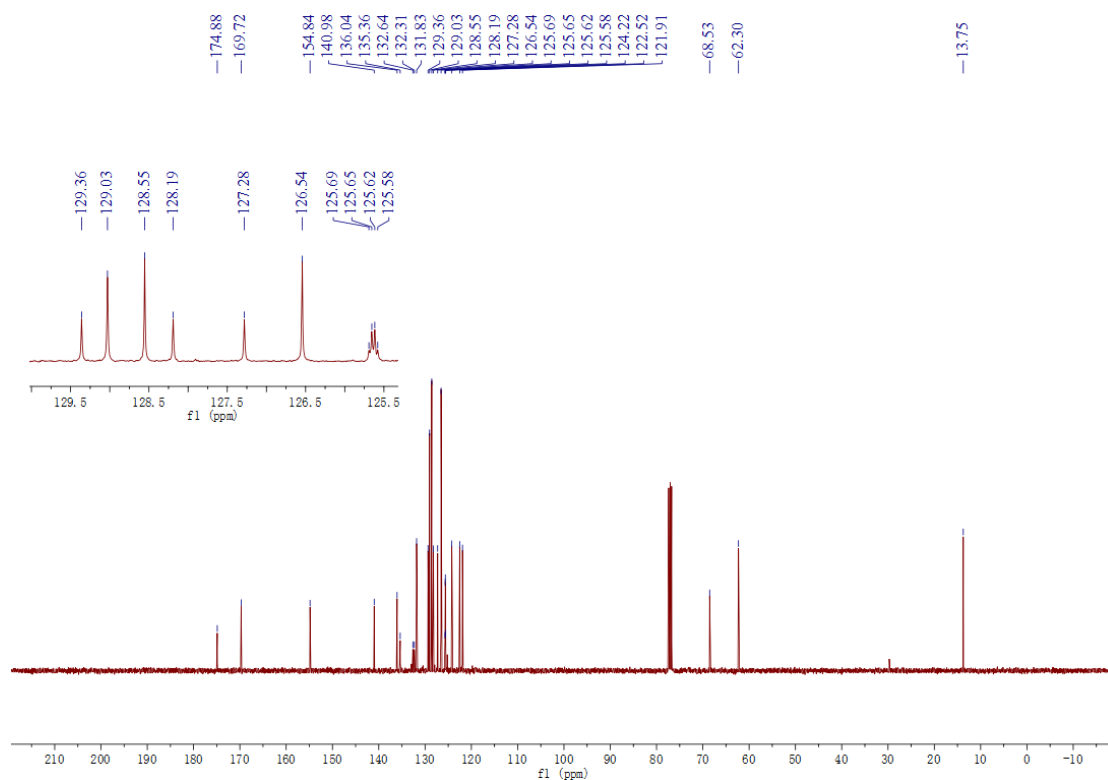

Figure S59  $^{13}\text{C}$  NMR (101 MHz,  $\text{CDCl}_3$ ) spectra of **3ap**

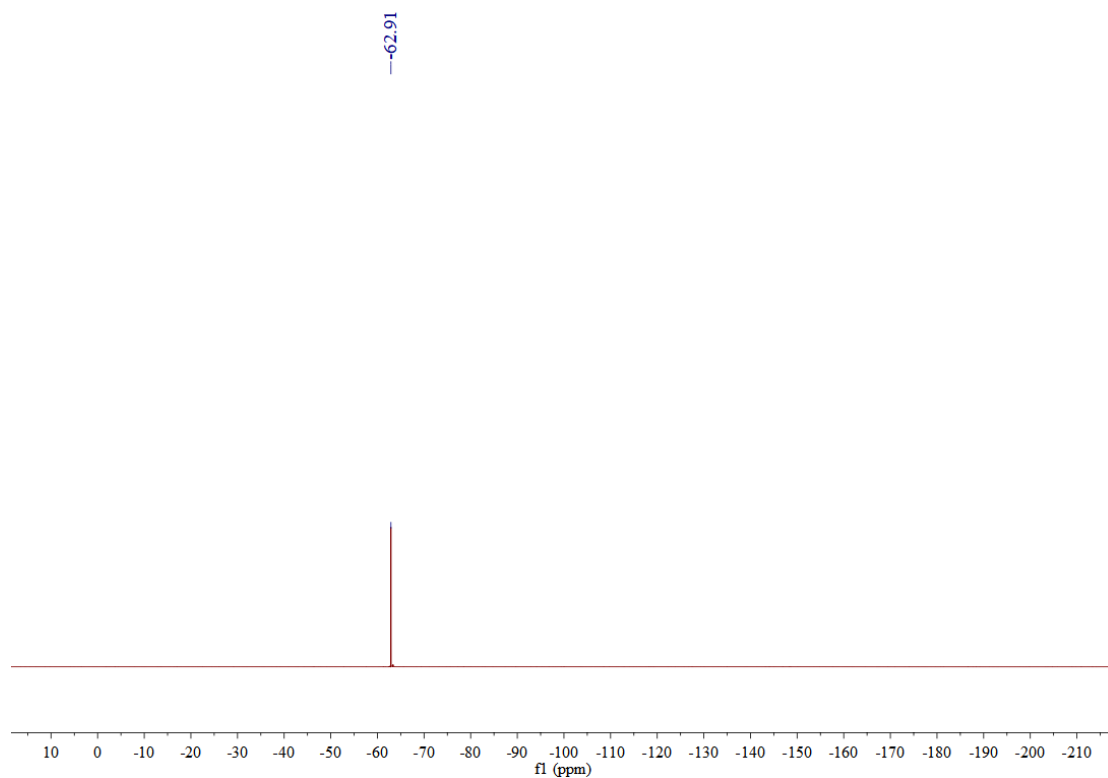

Figure S60  $^{19}\text{F}$  NMR (376 MHz,  $\text{CDCl}_3$ ) spectra of **3ap**

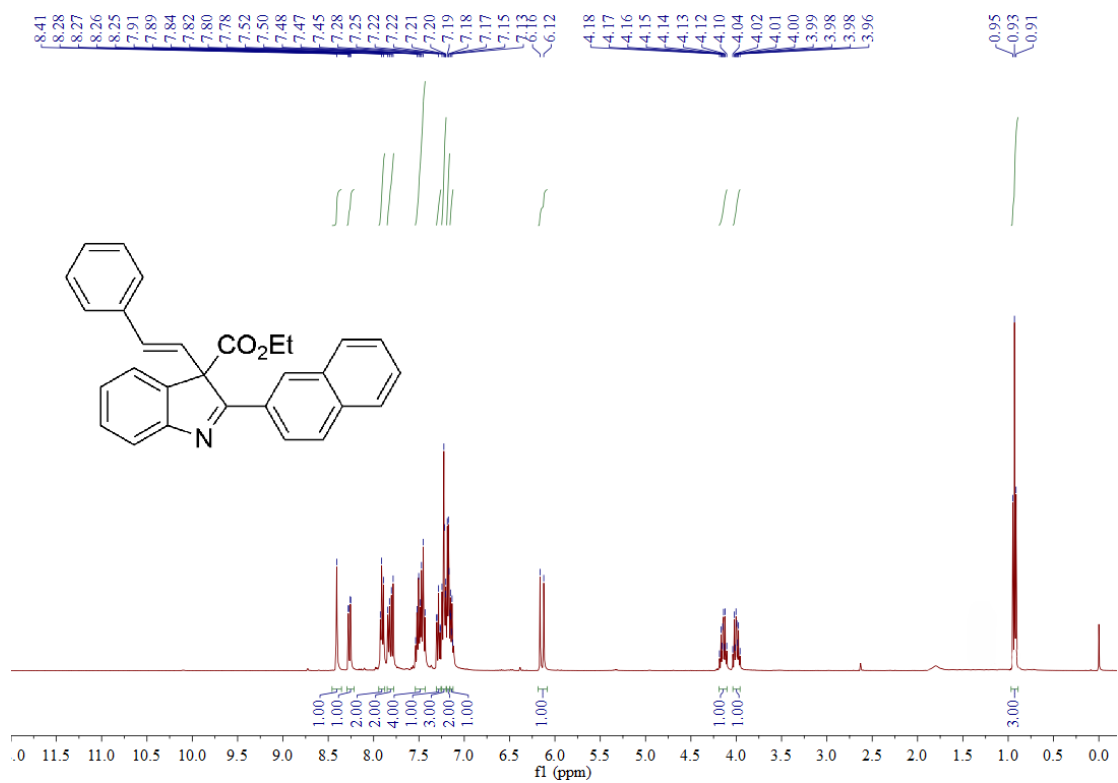

Figure S61 <sup>1</sup>H NMR (400 MHz, CDCl<sub>3</sub>) spectra of **3aq**



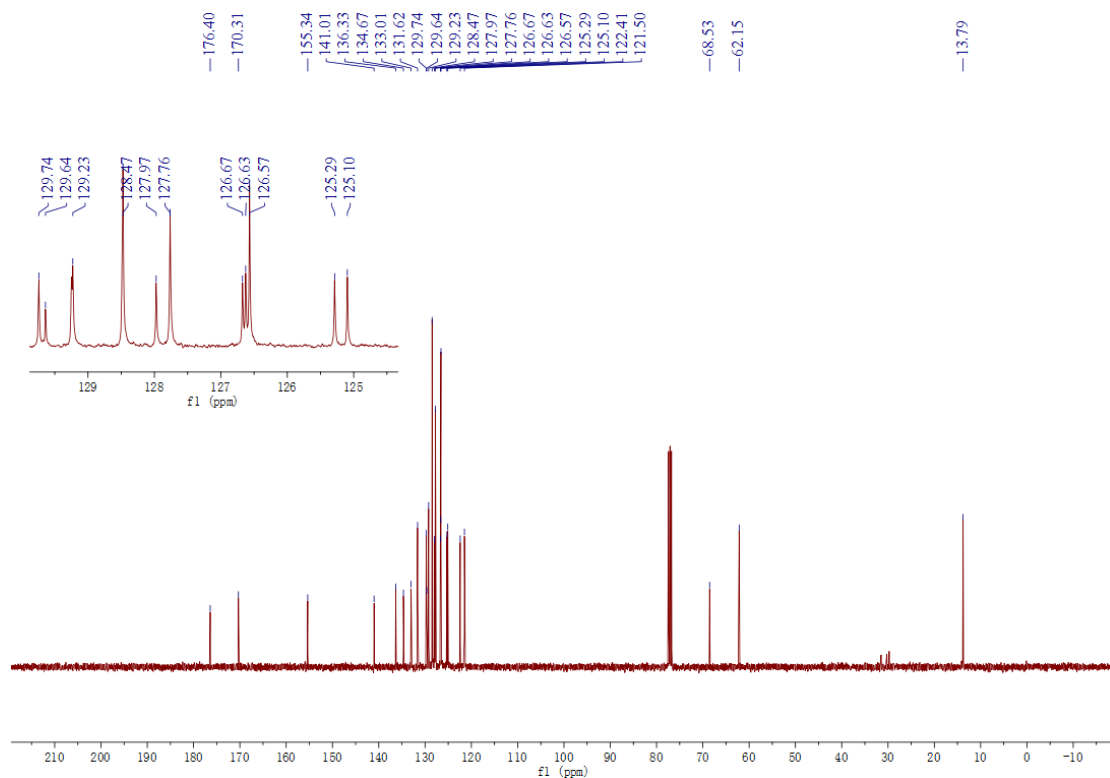

Figure S62  $^{13}\text{C}$  NMR (101 MHz,  $\text{CDCl}_3$ ) spectra of **3aq**

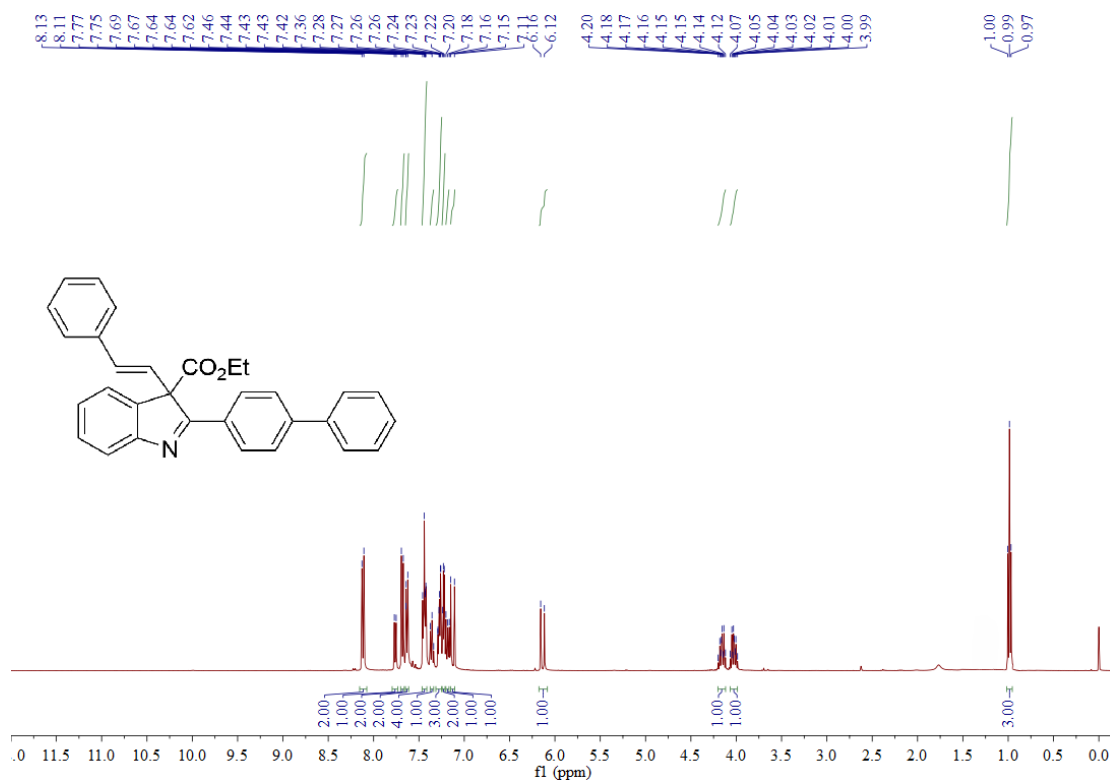

Figure S63  $^1\text{H}$  NMR (400 MHz,  $\text{CDCl}_3$ ) spectra of **3ar**

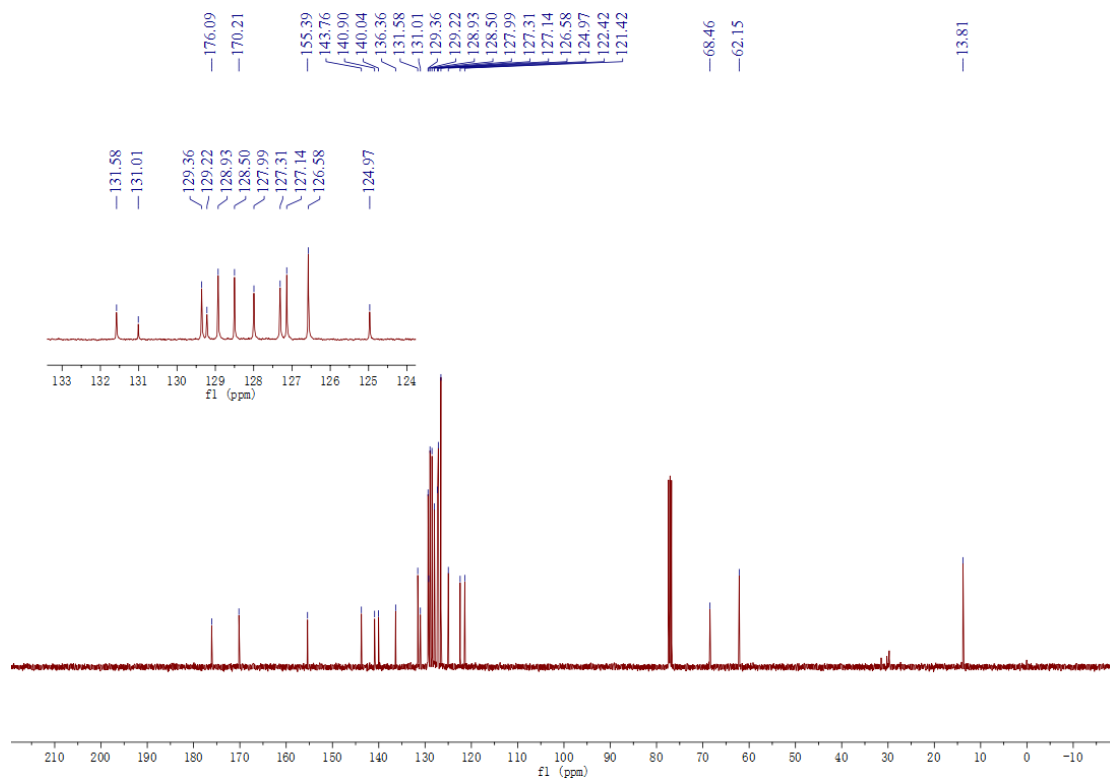

Figure S64  $^{13}\text{C}$  NMR (101 MHz,  $\text{CDCl}_3$ ) spectra of **3ar**

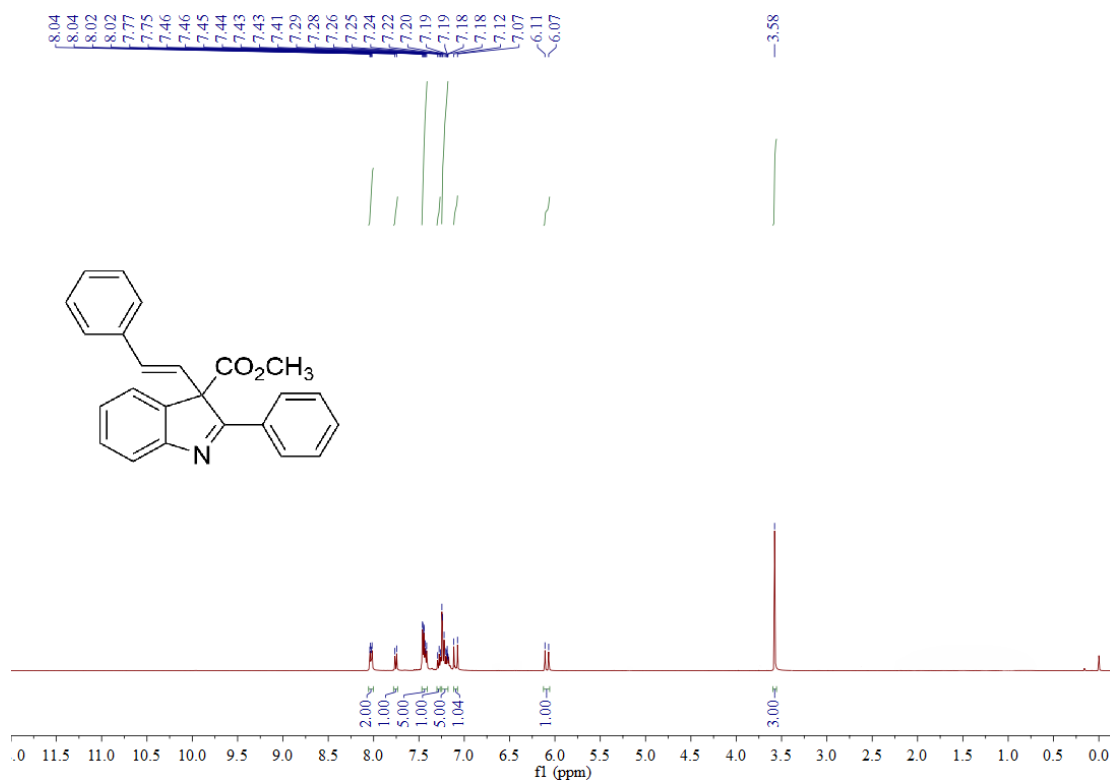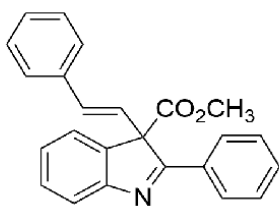

Figure S65  $^1\text{H}$  NMR (400 MHz,  $\text{CDCl}_3$ ) spectra of **3as**

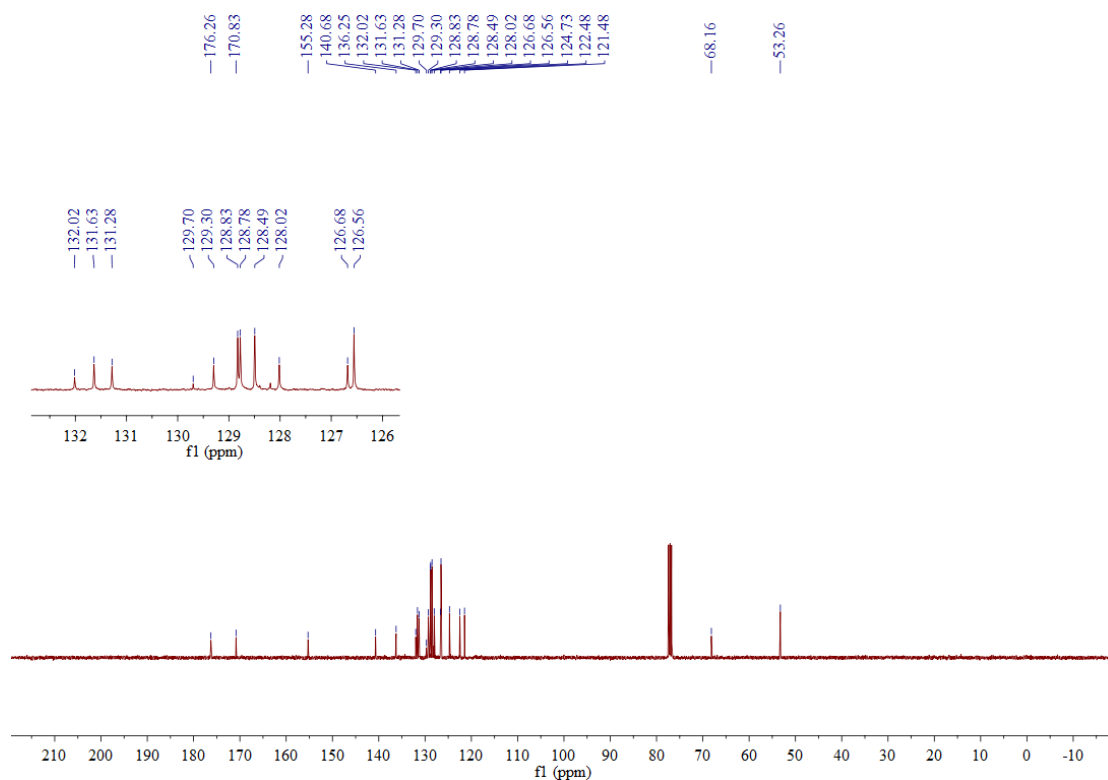

Figure S66 <sup>13</sup>C NMR (101 MHz, CDCl<sub>3</sub>) spectra of 3as

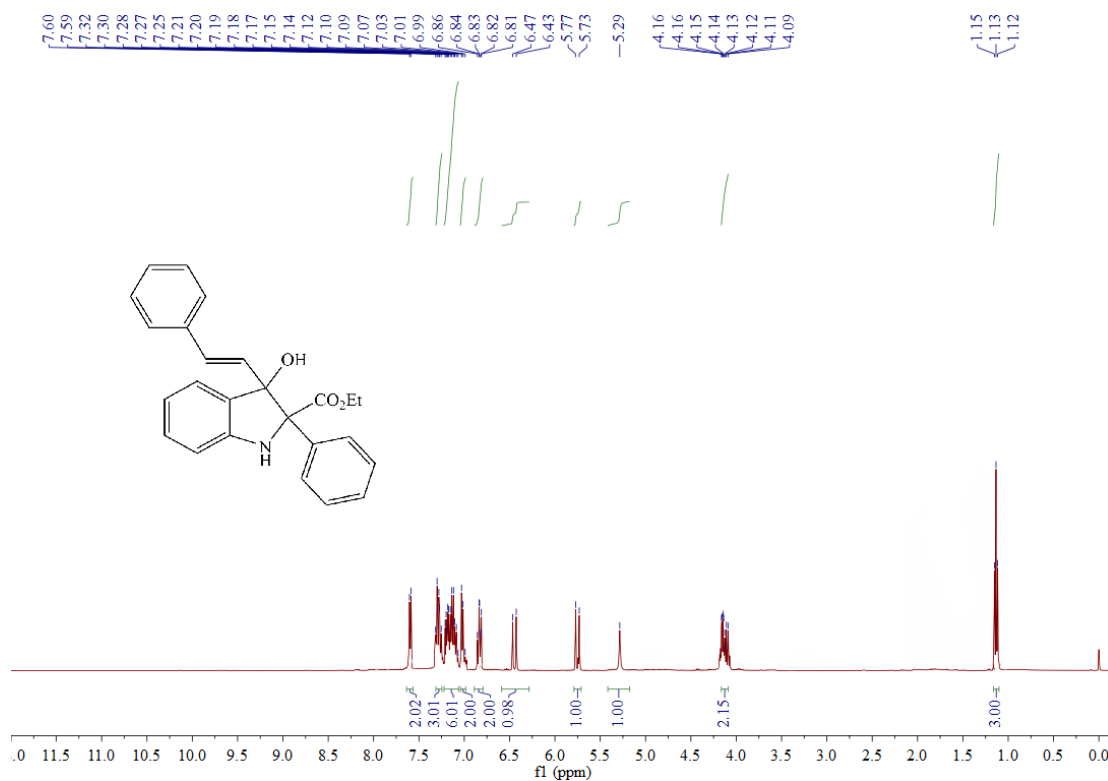

Figure S67 <sup>1</sup>H NMR (400 MHz, CDCl<sub>3</sub>) spectra of 4

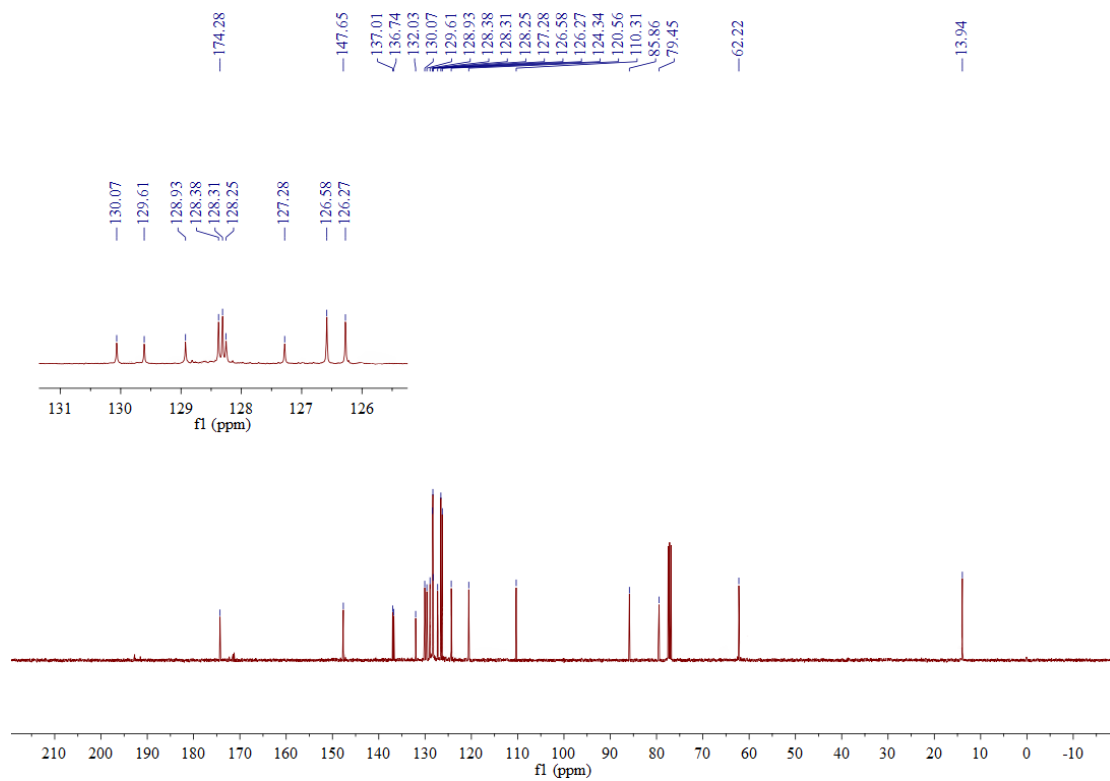

Figure S68  $^{13}\text{C}$  NMR (101 MHz,  $\text{CDCl}_3$ ) spectra of **4**
